# Supplementary material for: Vegetation optimality explains the convergence of catchments on the Budyko curve
Source: Copernicus journal article supplement (doi:10.5194/hess-2022-97), 2022-03-21
Supplement: Supplementary file 2 [file hess-2022-97-supplement.zip]

Archive with 5 entries (5 files):
- S1_VOM_timeseries.pdf
- S2_VOM_meteo_incr.pdf
- S3_catchment_data.pdf
- S4_dryness_index.pdf
- S5_equations.pdf
