# Supplementary material for: Vegetation optimality explains the convergence of catchments on the Budyko curve
Source: Copernicus journal article supplement (doi:10.5194/hess-2022-97), 2022-03-21
Supplement: Supplementary file 2 [file hess-2022-97-supplement.zip › S1_VOM_timeseries.pdf]

# Supplement S1

February 14, 2022

# 1 Time series of the VOM

## 1.1 North Australian Tropical Transect

### 1.1.1 Howard Springs

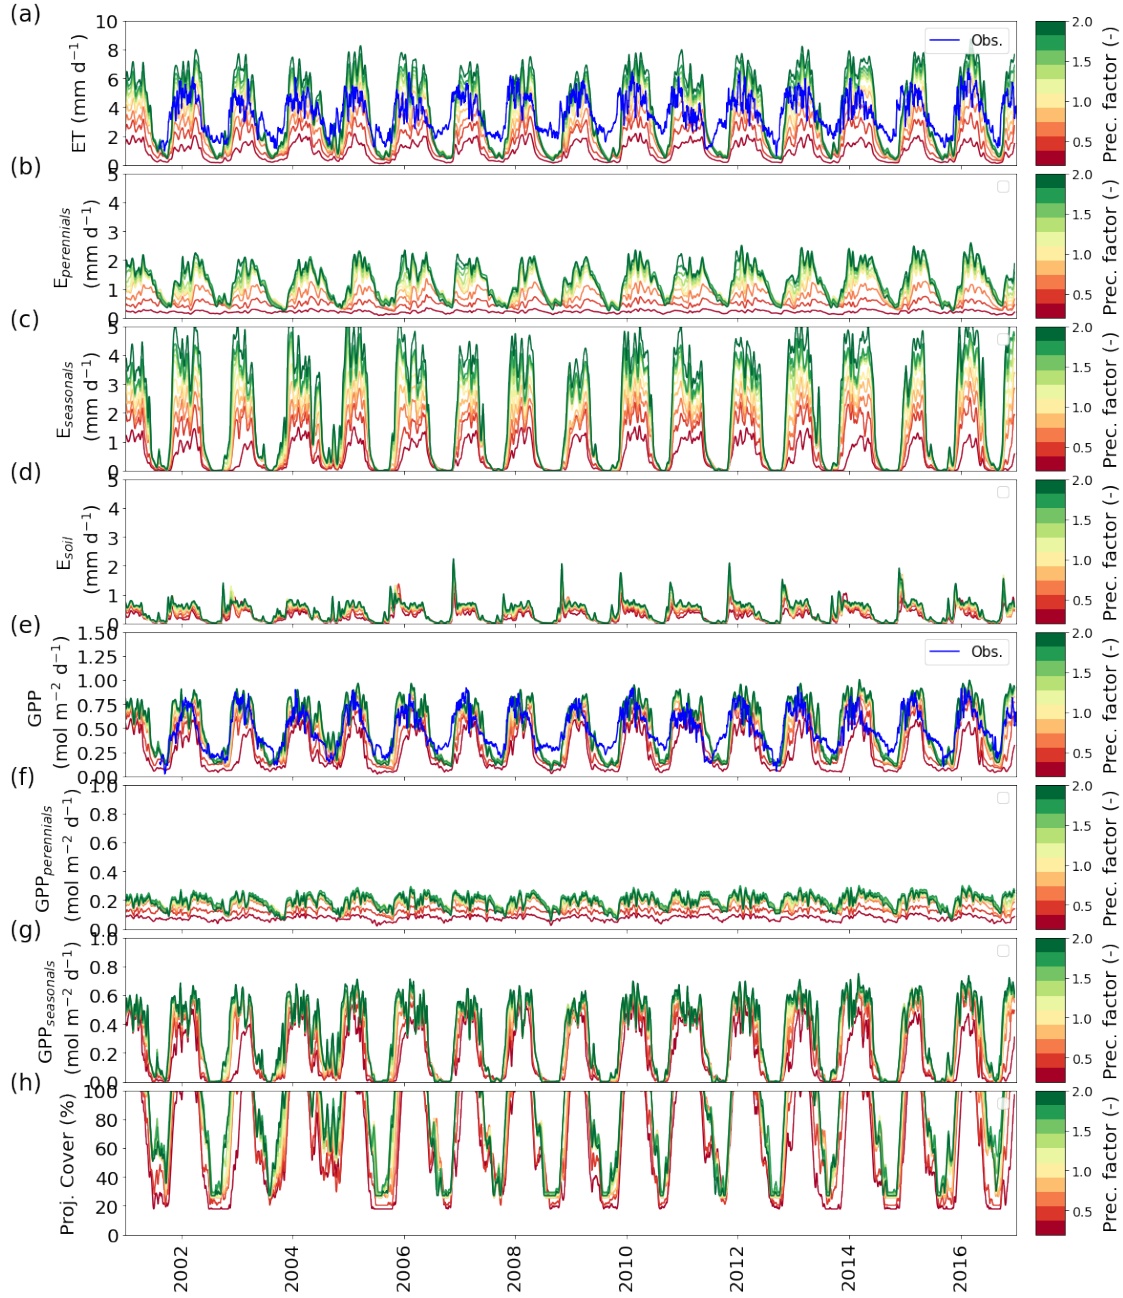

**Figure S1.1.** Fluxes for Howard Springs from 2001-2016 (subset from 1980-2016) for a) ET, b) transpiration perennials (trees), c) transpiration seasonals (grasses), d) soil evaporation, e) GPP, f) GPP perennials (trees), g) GPP seasonals (grasses), all smoothed with a moving average of 7

days, for the optimized VOM with different multiplications of the precipitation (color scale).

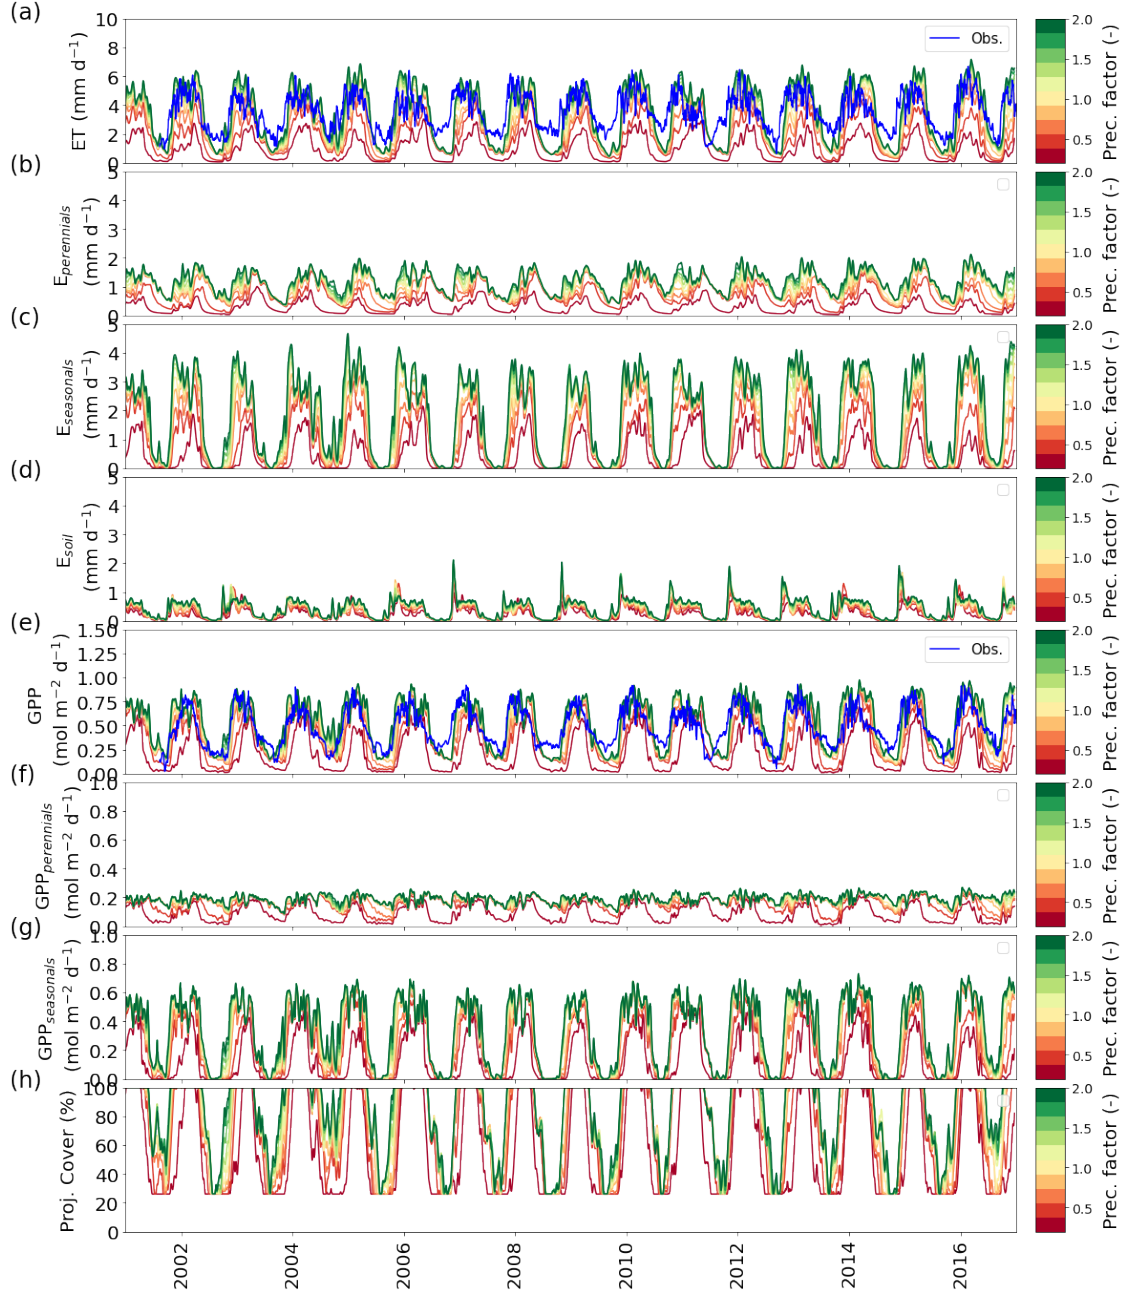

**Figure S1.2.** Fluxes for Howard Springs from 2001-2016 (subset from 1980-2016) for a) ET, b) transpiration perennials (trees), c) transpiration seasonals (grasses), d) soil evaporation, e) GPP, f) GPP perennials (trees), g) GPP seasonals (grasses), all smoothed with a moving average of 7 days, for the VOM with different multiplications of the precipitation (color scale) and the same vegetation parameters.

### 1.1.2 Adelaide River

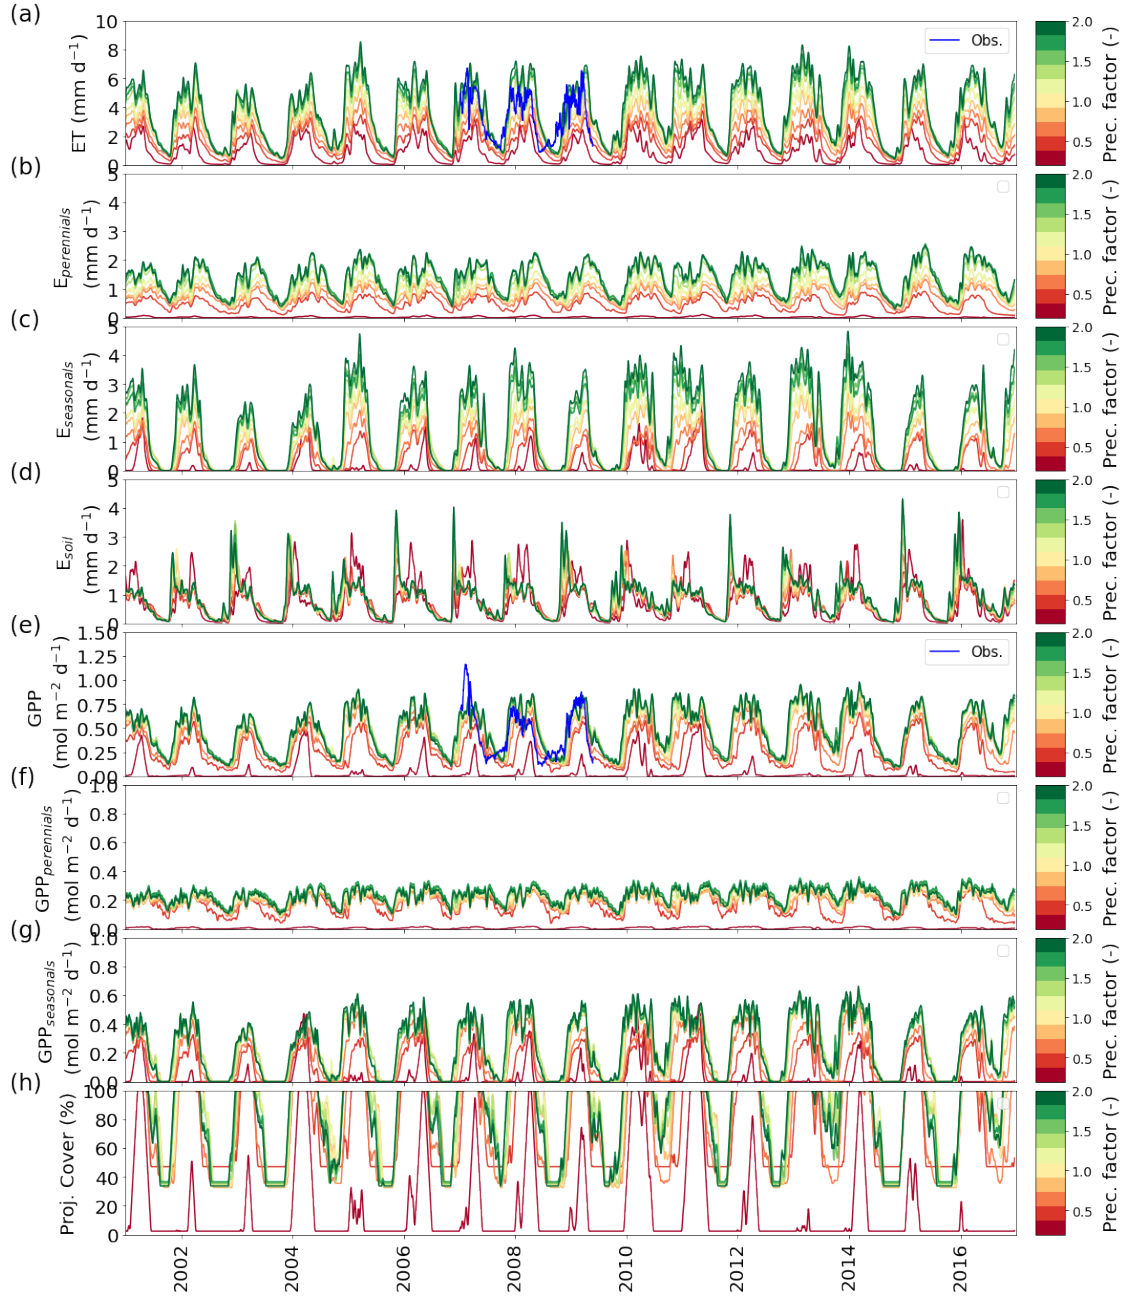

**Figure S1.3.** Fluxes for Adelaide River from 2001-2016 (subset from 1980-2016) for a) ET, b) transpiration perennials (trees), c) transpiration seasonals (grasses), d) soil evaporation, e) GPP, f) GPP perennials (trees), g) GPP seasonals (grasses), all smoothed with a moving average of 7 days, for the optimized VOM with different multiplications of the precipitation (color scale).

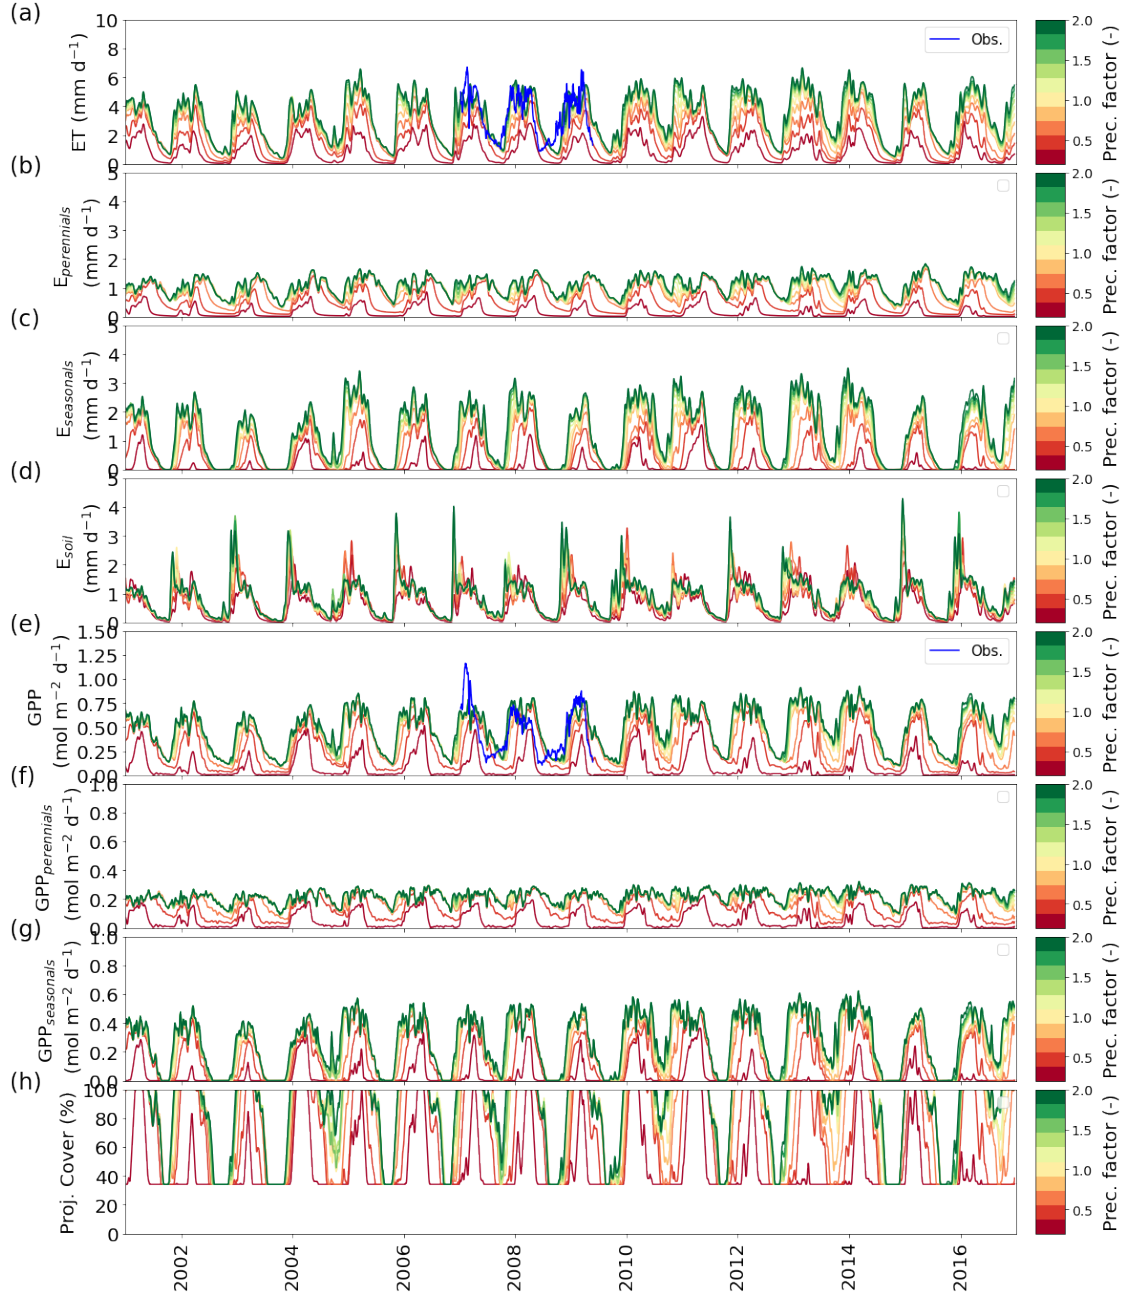

**Figure S1.4.** Fluxes for Adelaide River from 2001-2016 (subset from 1980-2016) for a) ET, b) transpiration perennials (trees), c) transpiration seasonals (grasses), d) soil evaporation, e) GPP, f) GPP perennials (trees), g) GPP seasonals (grasses), all smoothed with a moving average of 7 days, for the VOM with different multiplications of the precipitation (color scale) and the same vegetation parameters.

### 1.1.3 Daly Uncleared

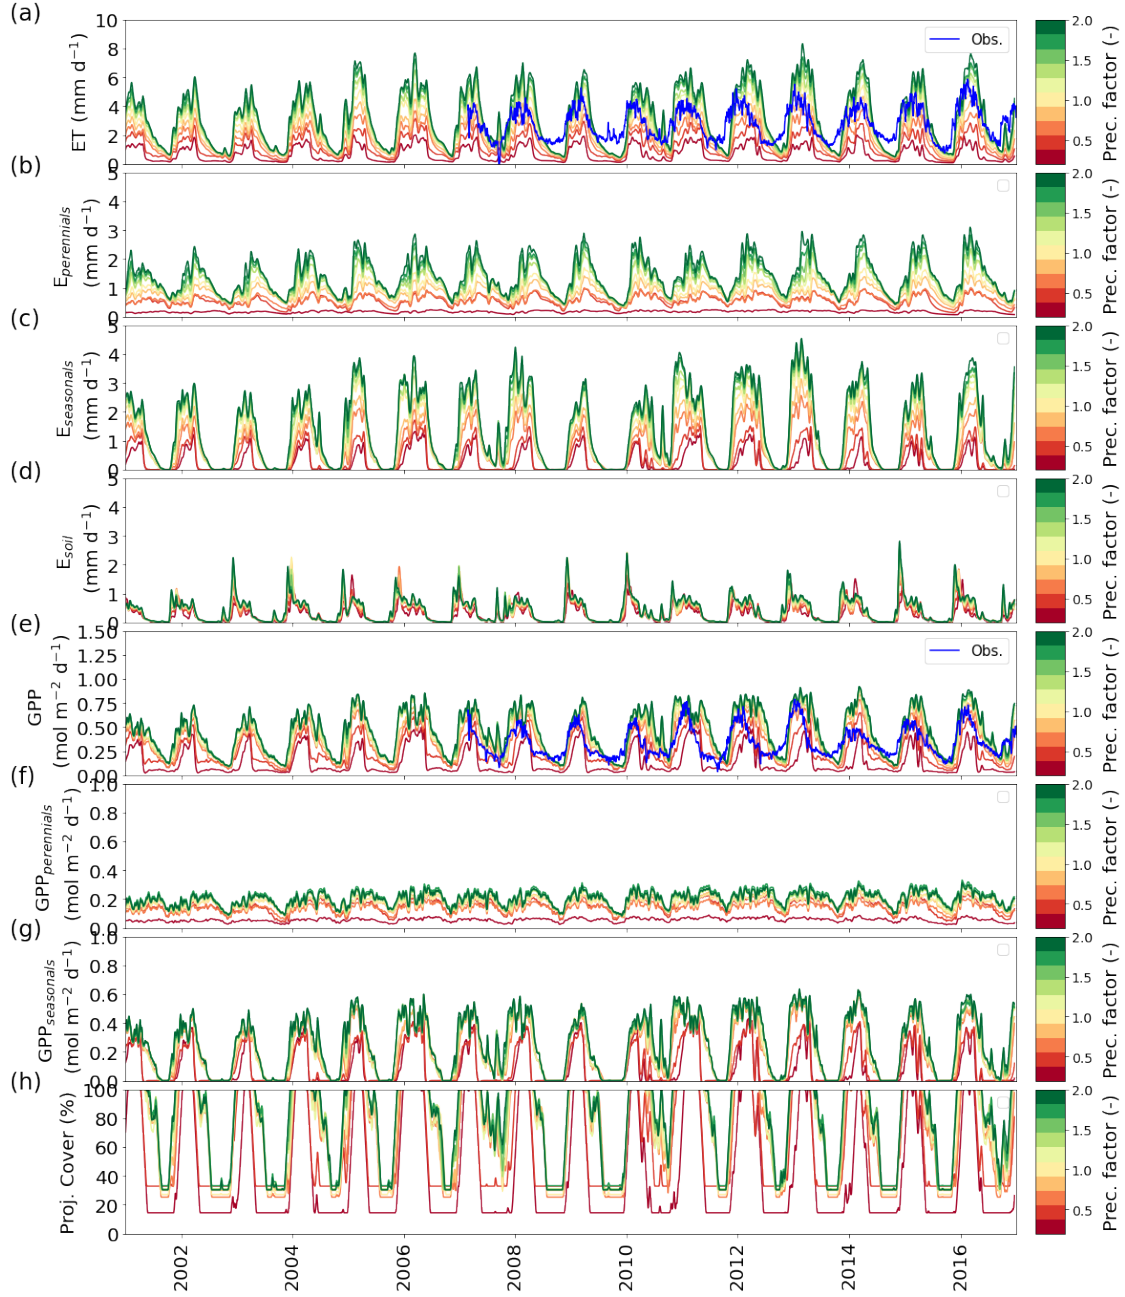

**Figure S1.5.** Fluxes for Daly Uncleared from 2001-2016 (subset from 1980-2016) for a) ET, b) transpiration perennials (trees), c) transpiration seasonals (grasses), d) soil evaporation, e) GPP, f) GPP perennials (trees), g) GPP seasonals (grasses), all smoothed with a moving average of 7 days, for the optimized VOM with different multiplications of the precipitation (color scale).

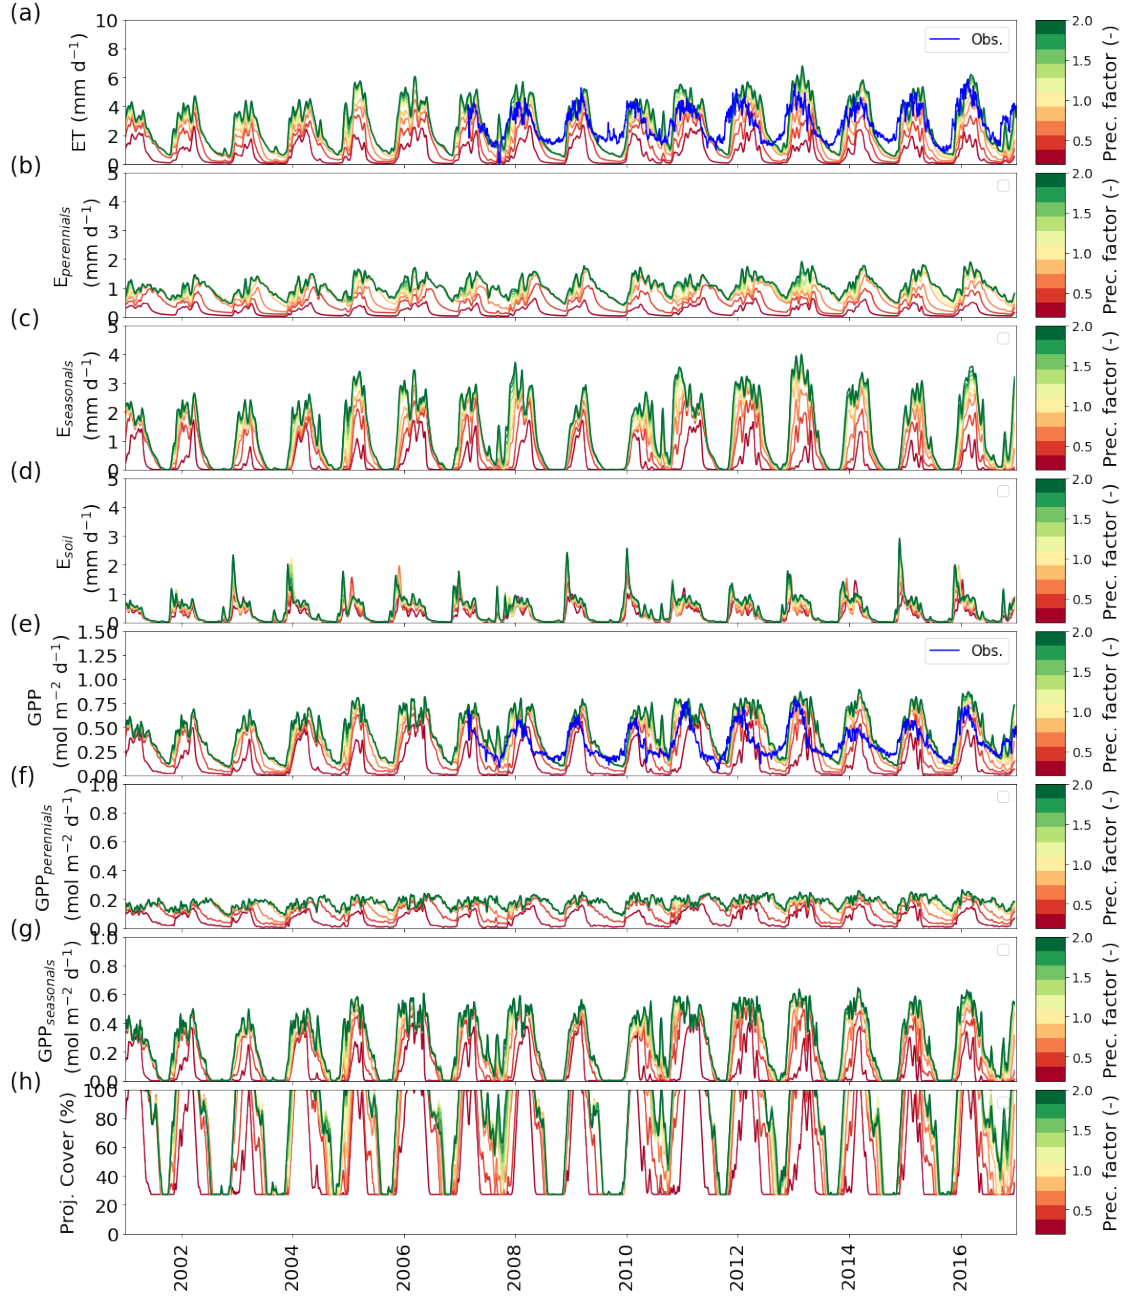

**Figure S1.6.** Fluxes for Daly Uncleared from 2001-2016 (subset from 1980-2016) for a) ET, b) transpiration perennials (trees), c) transpiration seasonals (grasses), d) soil evaporation, e) GPP, f) GPP perennials (trees), g) GPP seasonals (grasses), all smoothed with a moving average of 7 days, for the VOM with different multiplications of the precipitation (color scale) and the same vegetation parameters.

### 1.1.4 Dry River

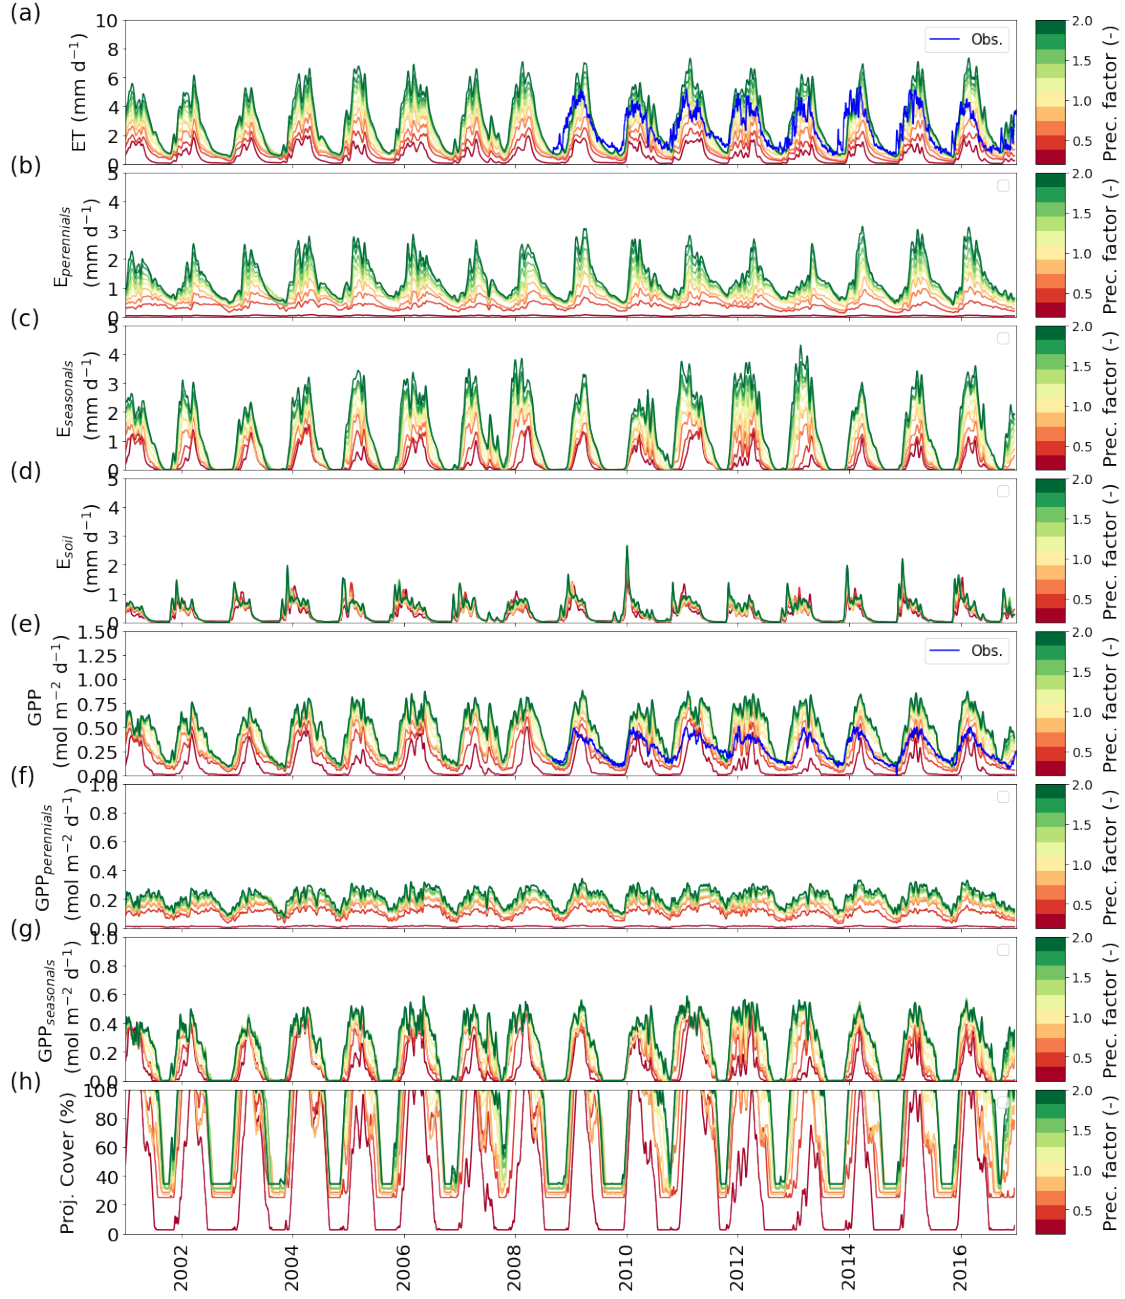

**Figure S1.7.** Fluxes for Dry River from 2001-2016 (subset from 1980-2016) for a) ET, b) transpiration perennials (trees), c) transpiration seasonals (grasses), d) soil evaporation, e) GPP, f) GPP perennials (trees), g) GPP seasonals (grasses), all smoothed with a moving average of 7 days, for the optimized VOM with different multiplications of the precipitation (color scale).

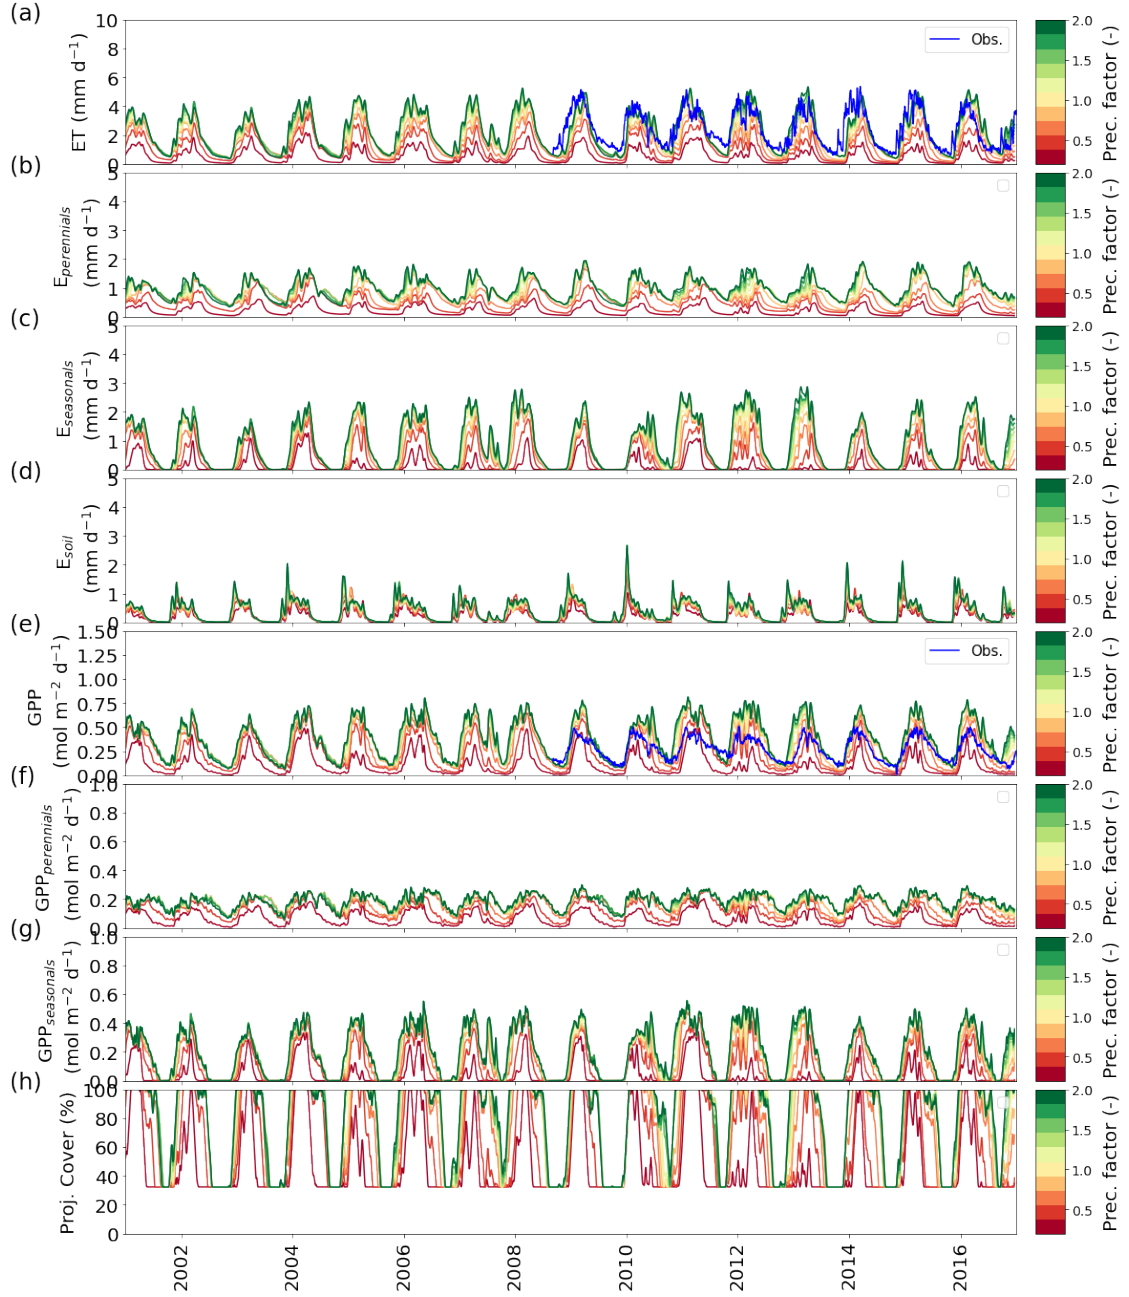

**Figure S1.8.** Fluxes for Daly Uncleared from 2001-2016 (subset from 1980-2016) for a) ET, b) transpiration perennials (trees), c) transpiration seasonals (grasses), d) soil evaporation, e) GPP, f) GPP perennials (trees), g) GPP seasonals (grasses), all smoothed with a moving average of 7 days, for the VOM with different multiplications of the precipitation (color scale) and the same vegetation parameters.

### 1.1.5 Sturt Plains

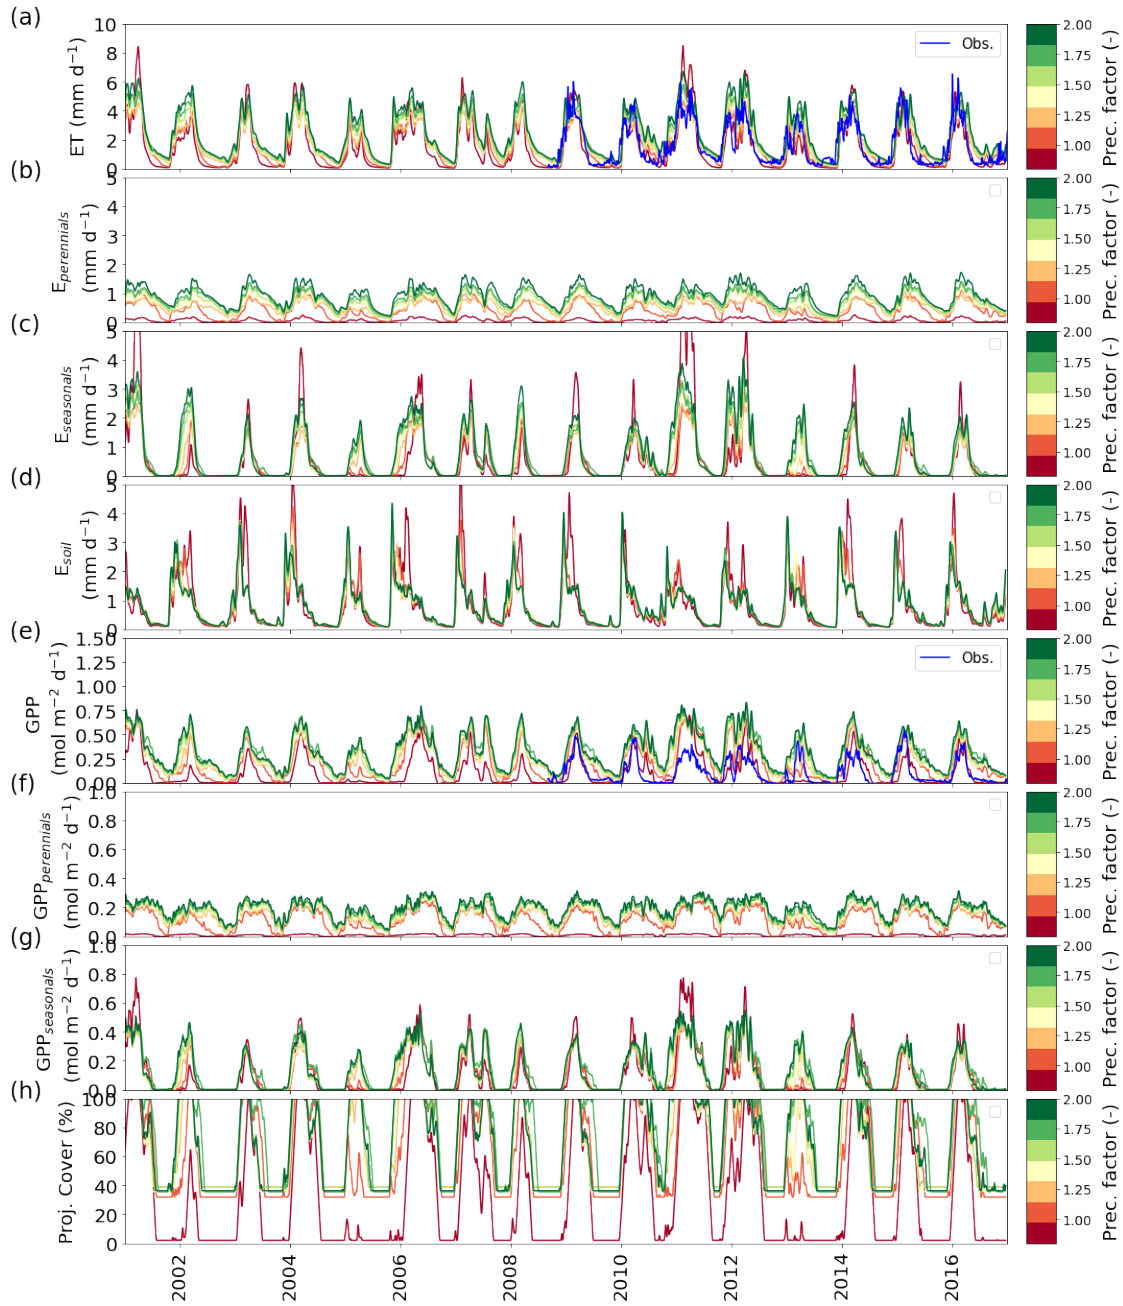

**Figure S1.9.** Fluxes for Sturt Plains from 2001-2016 (subset from 1980-2016) for a) ET, b) transpiration perennials (trees), c) transpiration seasonals (grasses), d) soil evaporation, e) GPP, f) GPP perennials (trees), g) GPP seasonals (grasses), all smoothed with a moving average of 7 days, for the optimized VOM with different multiplications of the precipitation (color scale).

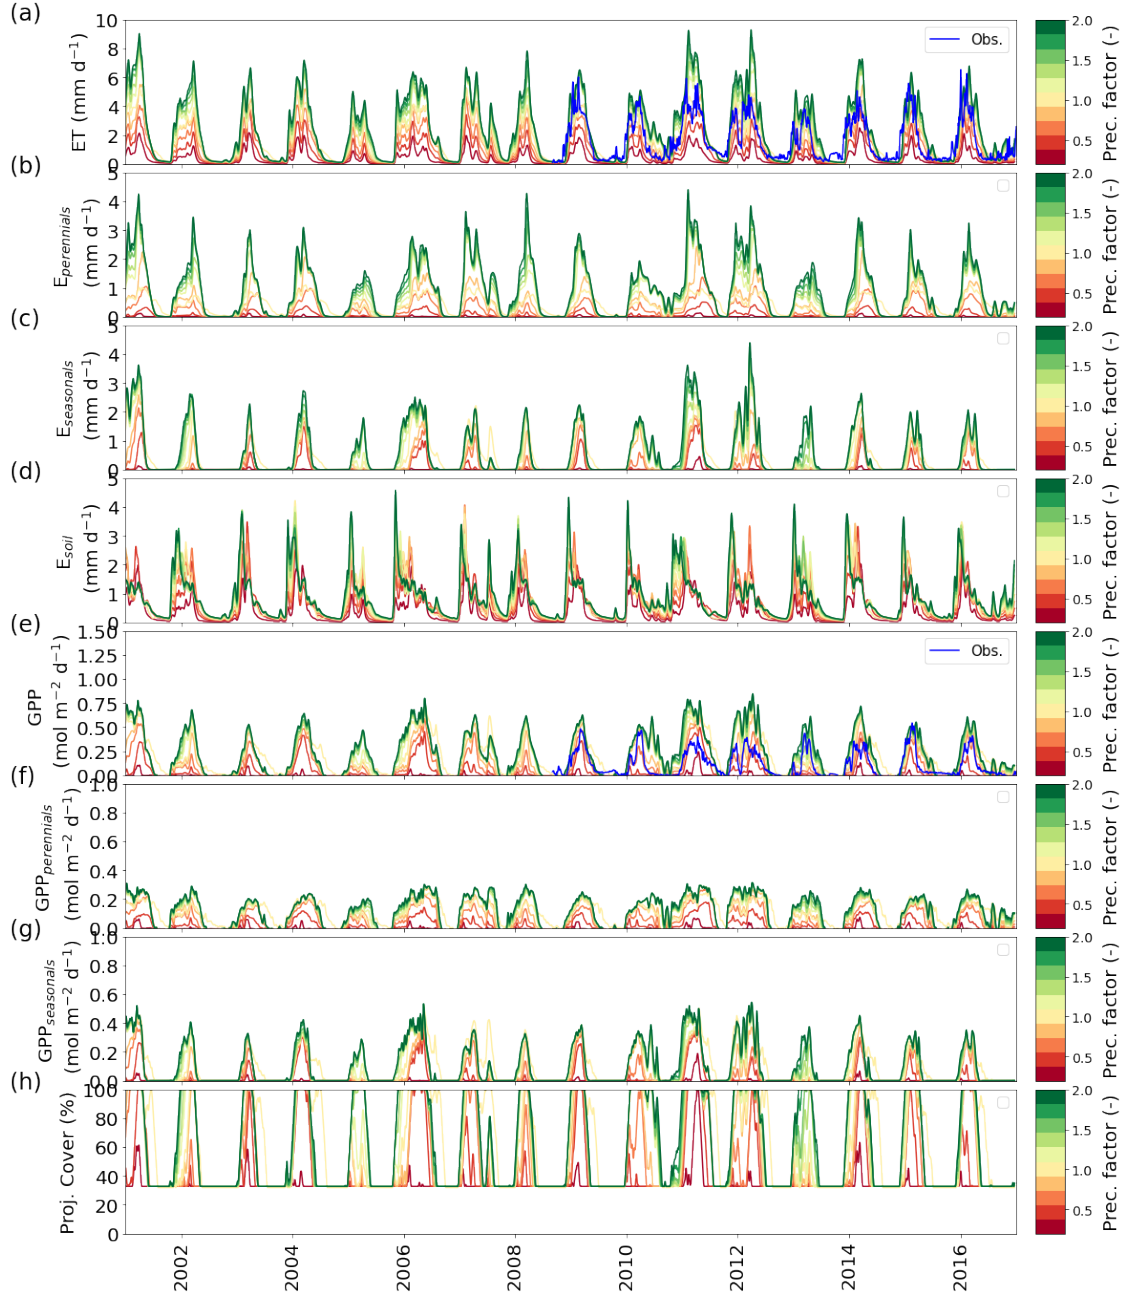

**Figure S1.10.** Fluxes for Sturt Plains from 2001-2016 (subset from 1980-2016) for a) ET, b) transpiration perennials (trees), c) transpiration seasonals (grasses), d) soil evaporation, e) GPP, f) GPP perennials (trees), g) GPP seasonals (grasses), all smoothed with a moving average of 7 days, for the VOM with different multiplications of the precipitation (color scale) and the same vegetation parameters.

## 1.2 Virtual points

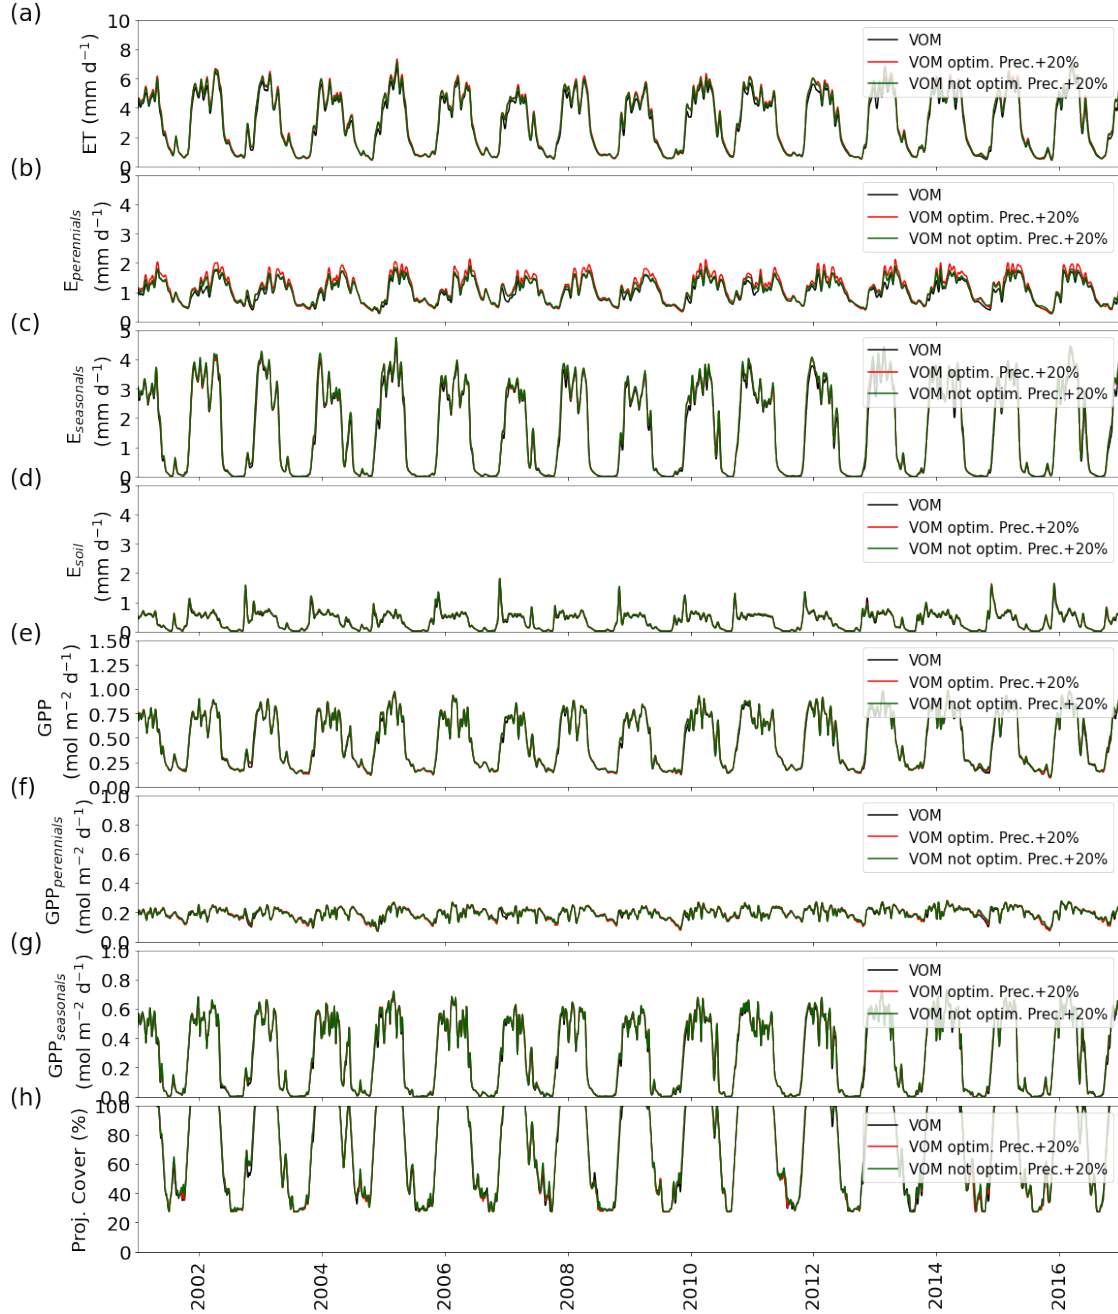

**Figure S1.11.** Fluxes for point 12.5S,131.0E from 2001-2016 (subset from 1980-2016) for a) ET, b) transpiration perennials (trees), c) transpiration seasonals (grasses), d) soil evaporation, e) GPP, f) GPP perennials (trees), g) GPP seasonals (grasses), all smoothed with a moving average of 7 days, for the optimized VOM (black), optimized VOM with increased precipitation (red), and the VOM without optimization and increased precipitation (green).

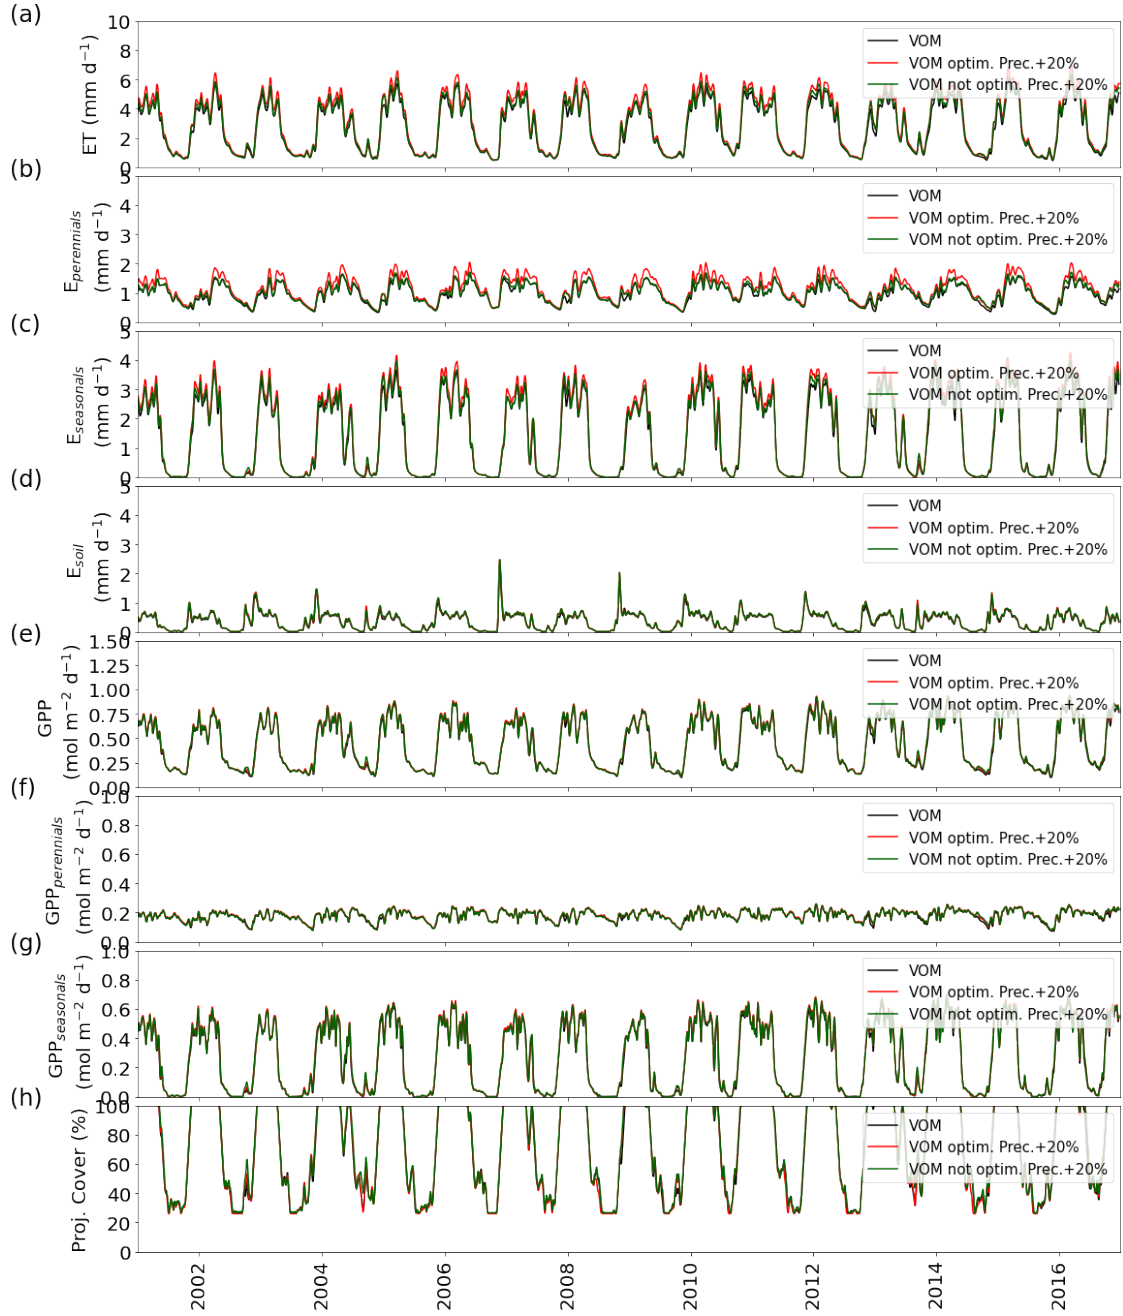

**Figure S1.12.** Fluxes for point 12.5S,131.5E from 2001-2016 (subset from 1980-2016) for a) ET, b) transpiration perennials (trees), c) transpiration seasonals (grasses), d) soil evaporation, e) GPP, f) GPP perennials (trees), g) GPP seasonals (grasses), all smoothed with a moving average of 7 days, for the optimized VOM (black), optimized VOM with increased precipitation (red), and the VOM without optimization and increased precipitation (green).

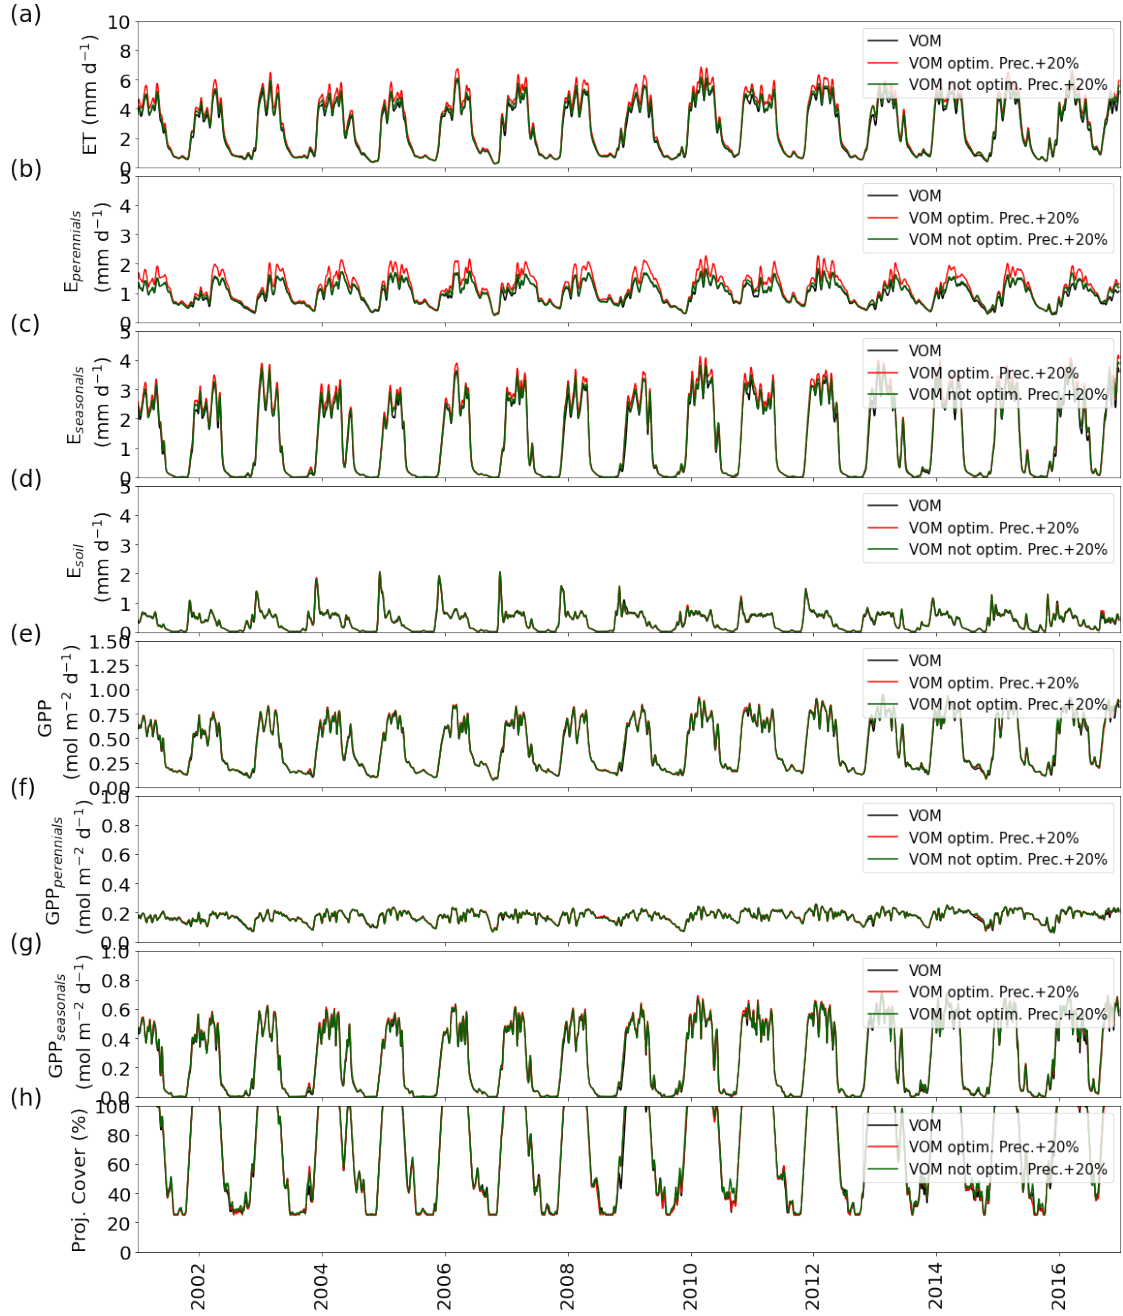

**Figure S1.13.** Fluxes for point 12.5S,132.0E from 2001-2016 (subset from 1980-2016) for a) ET, b) transpiration perennials (trees), c) transpiration seasonals (grasses), d) soil evaporation, e) GPP, f) GPP perennials (trees), g) GPP seasonals (grasses), all smoothed with a moving average of 7 days, for the optimized VOM (black), optimized VOM with increased precipitation (red), and the VOM without optimization and increased precipitation (green).

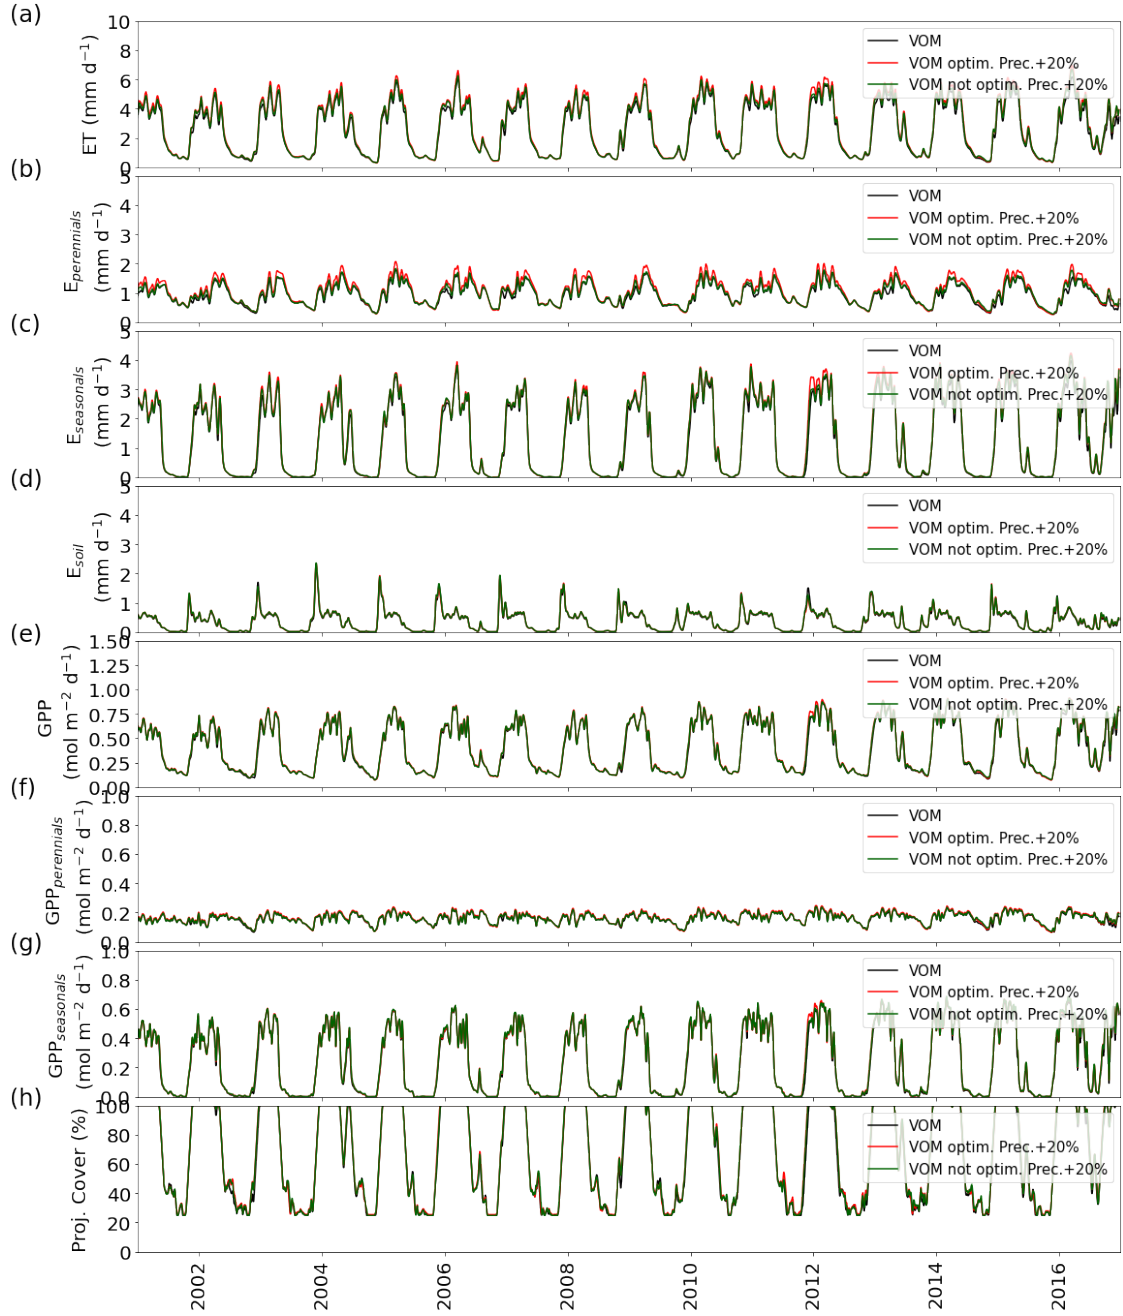

**Figure S1.14.** Fluxes for point 12.5S,132.5E from 2001-2016 (subset from 1980-2016) for a) ET, b) transpiration perennials (trees), c) transpiration seasonals (grasses), d) soil evaporation, e) GPP, f) GPP perennials (trees), g) GPP seasonals (grasses), all smoothed with a moving average of 7 days, for the optimized VOM (black), optimized VOM with increased precipitation (red), and the VOM without optimization and increased precipitation (green).

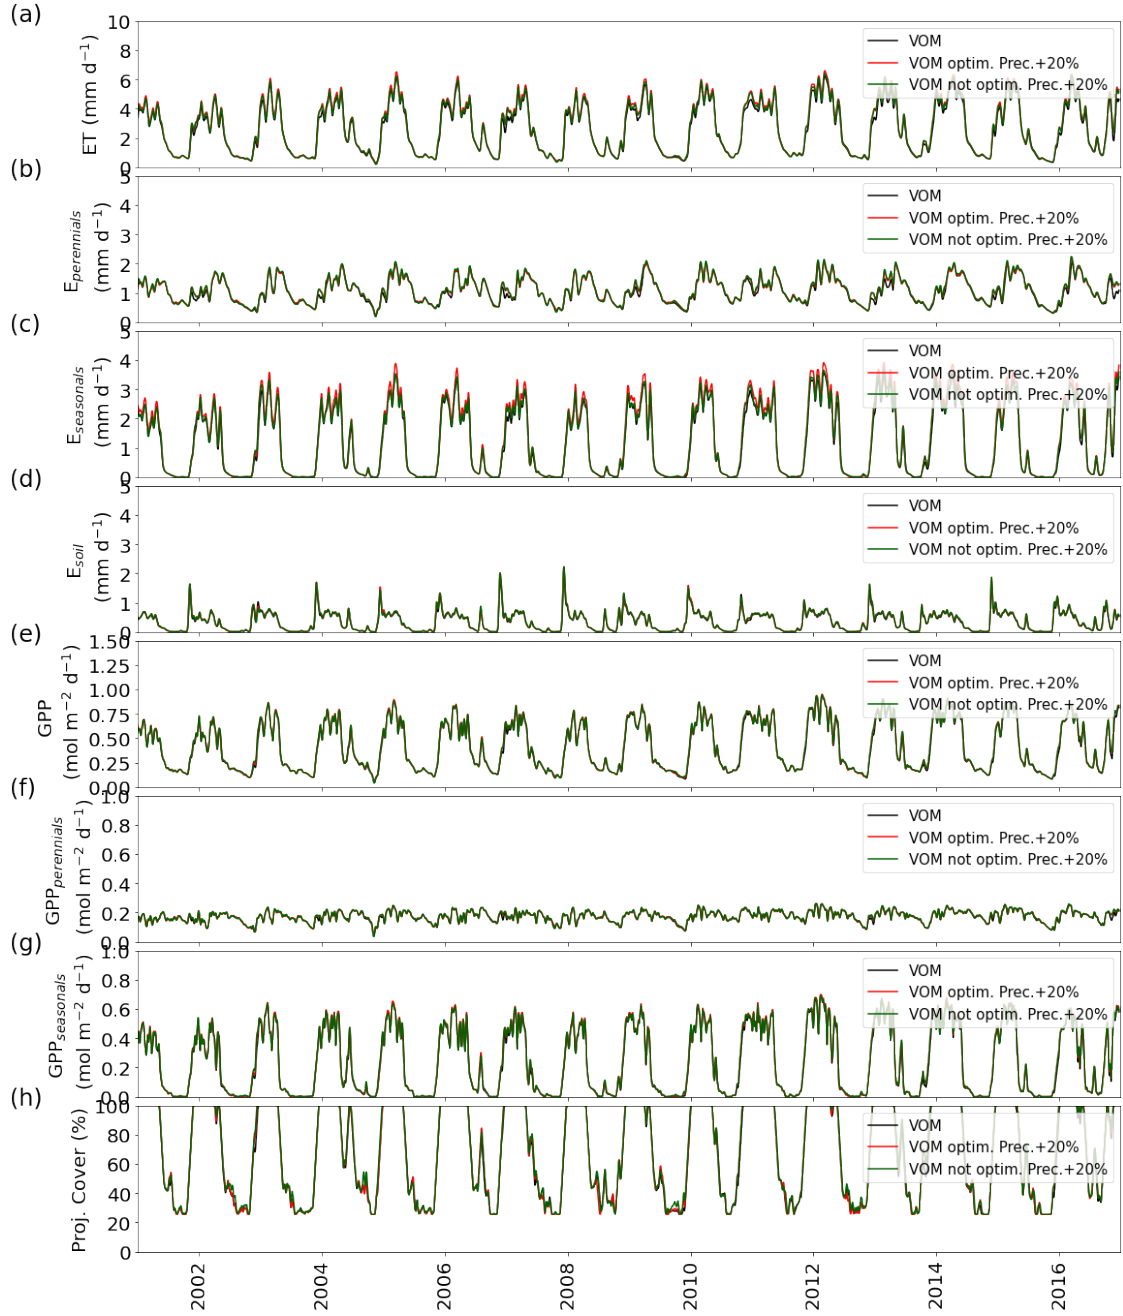

**Figure S1.15.** Fluxes for point 12.5S,133.0E from 2001-2016 (subset from 1980-2016) for a) ET, b) transpiration perennials (trees), c) transpiration seasonals (grasses), d) soil evaporation, e) GPP, f) GPP perennials (trees), g) GPP seasonals (grasses), all smoothed with a moving average of 7 days, for the optimized VOM (black), optimized VOM with increased precipitation (red), and the VOM without optimization and increased precipitation (green).

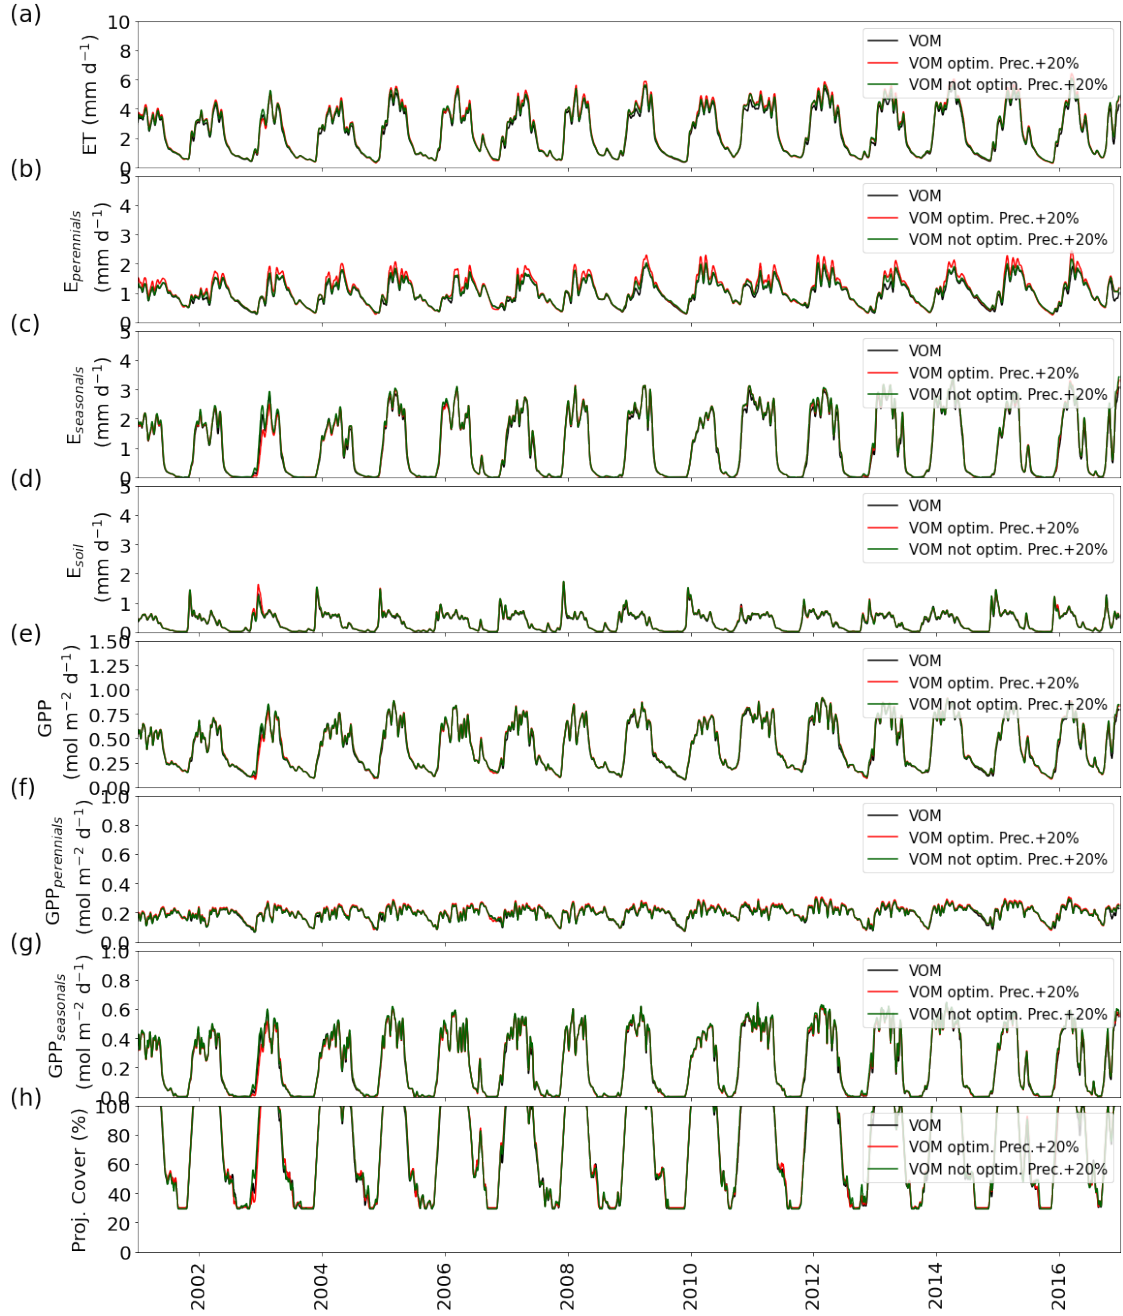

**Figure S1.16.** Fluxes for point 12.5S,133.5E from 2001-2016 (subset from 1980-2016) for a) ET, b) transpiration perennials (trees), c) transpiration seasonals (grasses), d) soil evaporation, e) GPP, f) GPP perennials (trees), g) GPP seasonals (grasses), all smoothed with a moving average of 7 days, for the optimized VOM (black), optimized VOM with increased precipitation (red), and the VOM without optimization and increased precipitation (green).

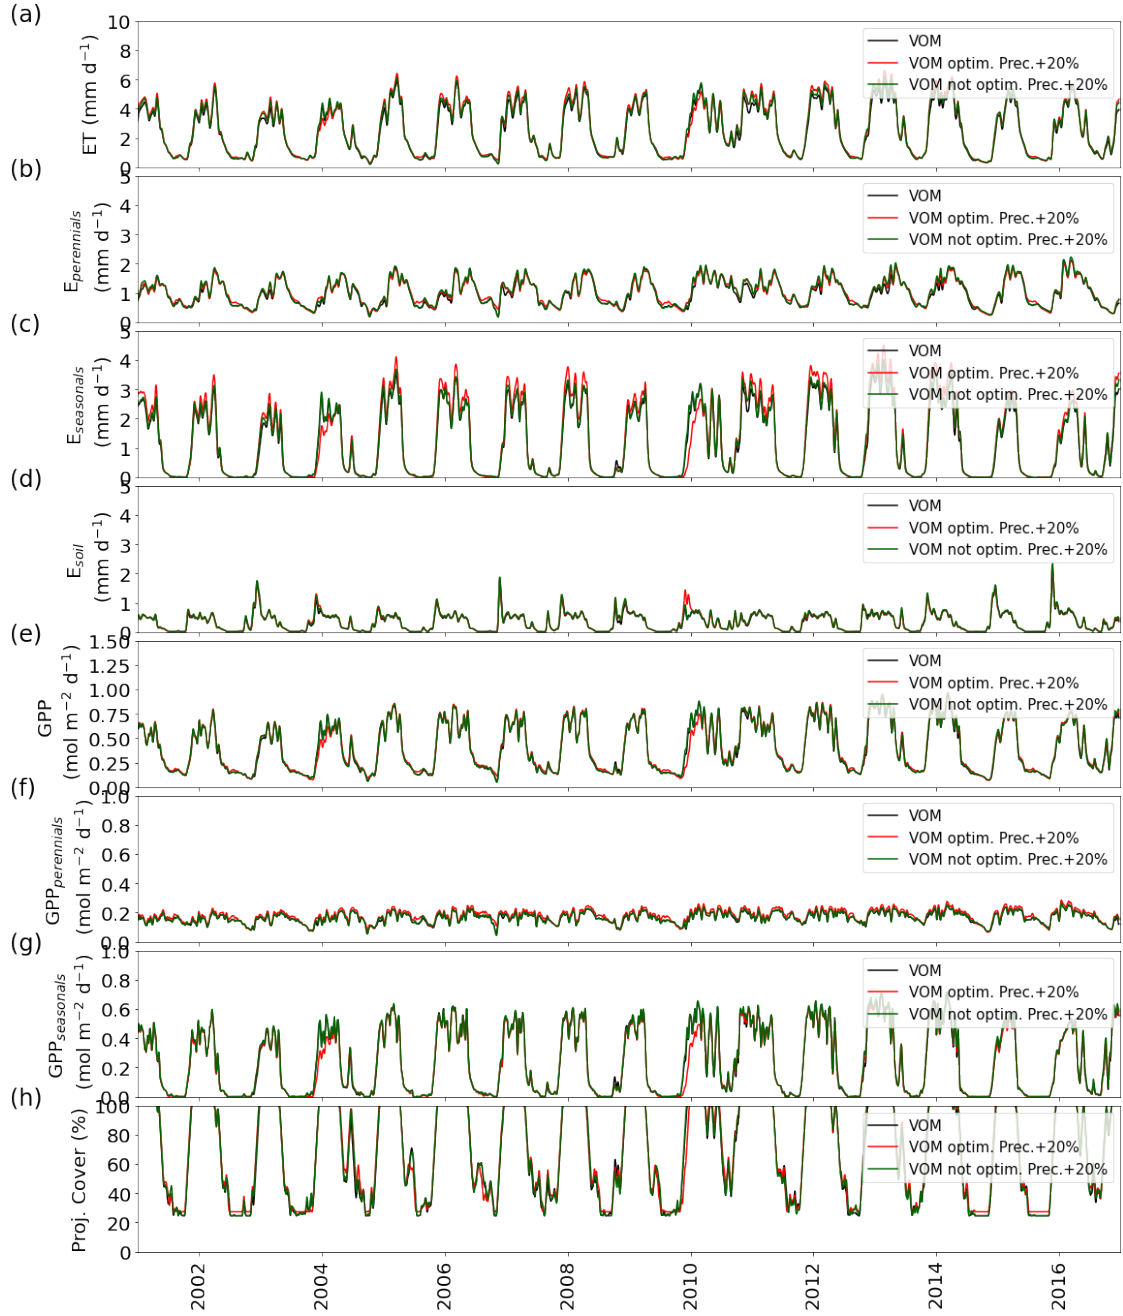

**Figure S1.17.** Fluxes for point 13.5S,131.0E from 2001-2016 (subset from 1980-2016) for a) ET, b) transpiration perennials (trees), c) transpiration seasonals (grasses), d) soil evaporation, e) GPP, f) GPP perennials (trees), g) GPP seasonals (grasses), all smoothed with a moving average of 7 days, for the optimized VOM (black), optimized VOM with increased precipitation (red), and the VOM without optimization and increased precipitation (green).

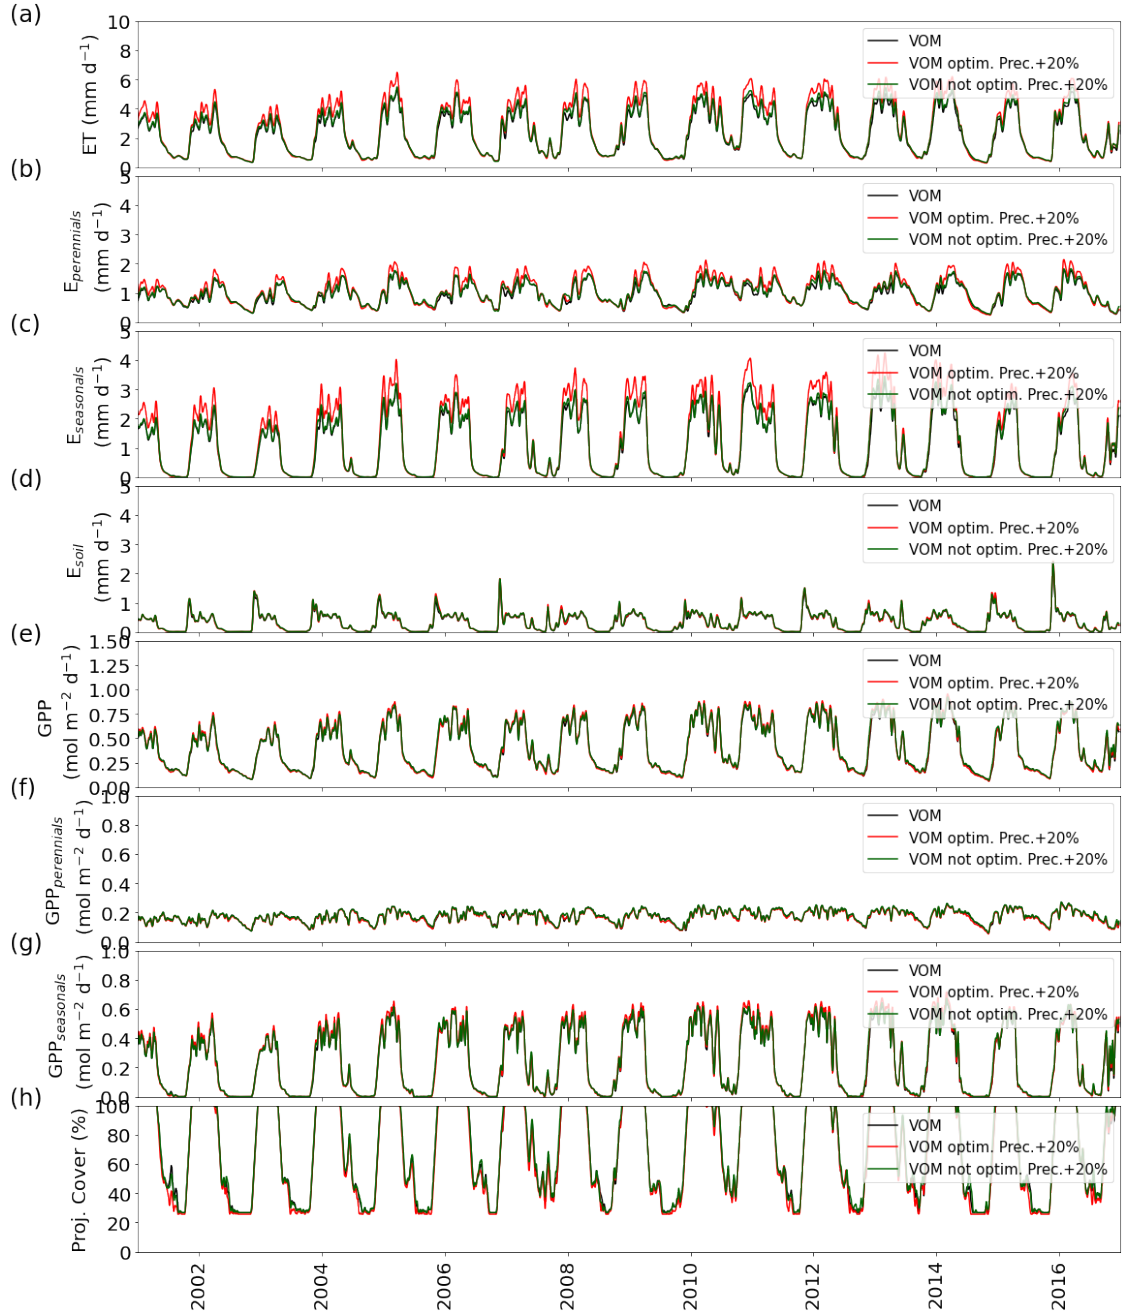

**Figure S1.18.** Fluxes for point 13.5S,131.5E from 2001-2016 (subset from 1980-2016) for a) ET, b) transpiration perennials (trees), c) transpiration seasonals (grasses), d) soil evaporation, e) GPP, f) GPP perennials (trees), g) GPP seasonals (grasses), all smoothed with a moving average of 7 days, for the optimized VOM (black), optimized VOM with increased precipitation (red), and the VOM without optimization and increased precipitation (green).

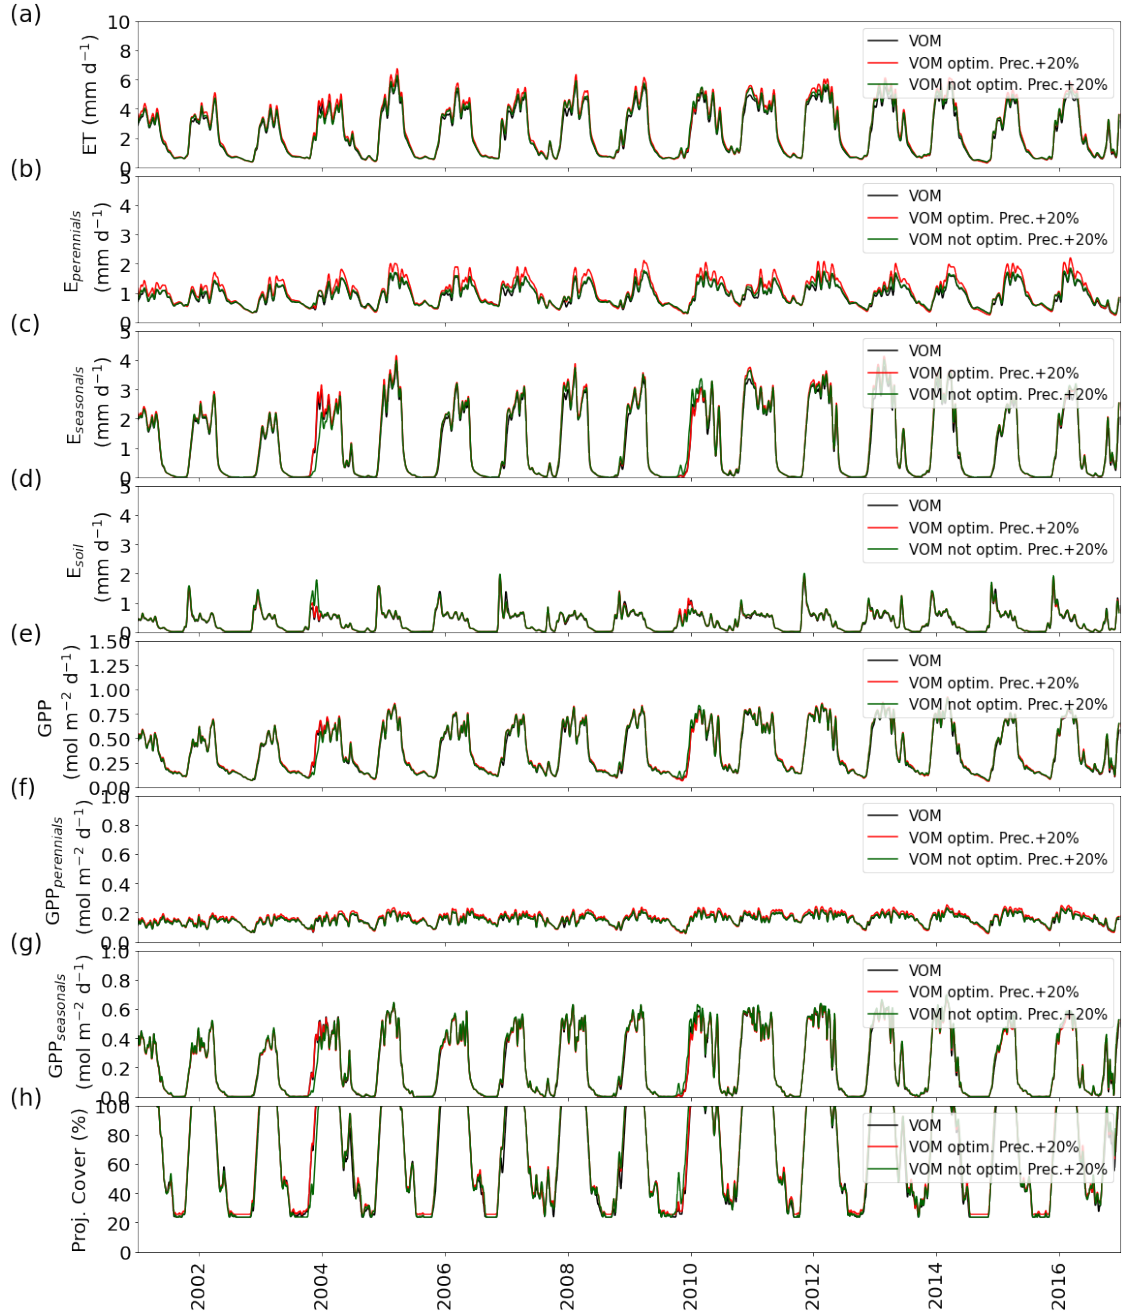

**Figure S1.19.** Fluxes for point 13.5S,132.0E from 2001-2016 (subset from 1980-2016) for a) ET, b) transpiration perennials (trees), c) transpiration seasonals (grasses), d) soil evaporation, e) GPP, f) GPP perennials (trees), g) GPP seasonals (grasses), all smoothed with a moving average of 7 days, for the optimized VOM (black), optimized VOM with increased precipitation (red), and the VOM without optimization and increased precipitation (green).

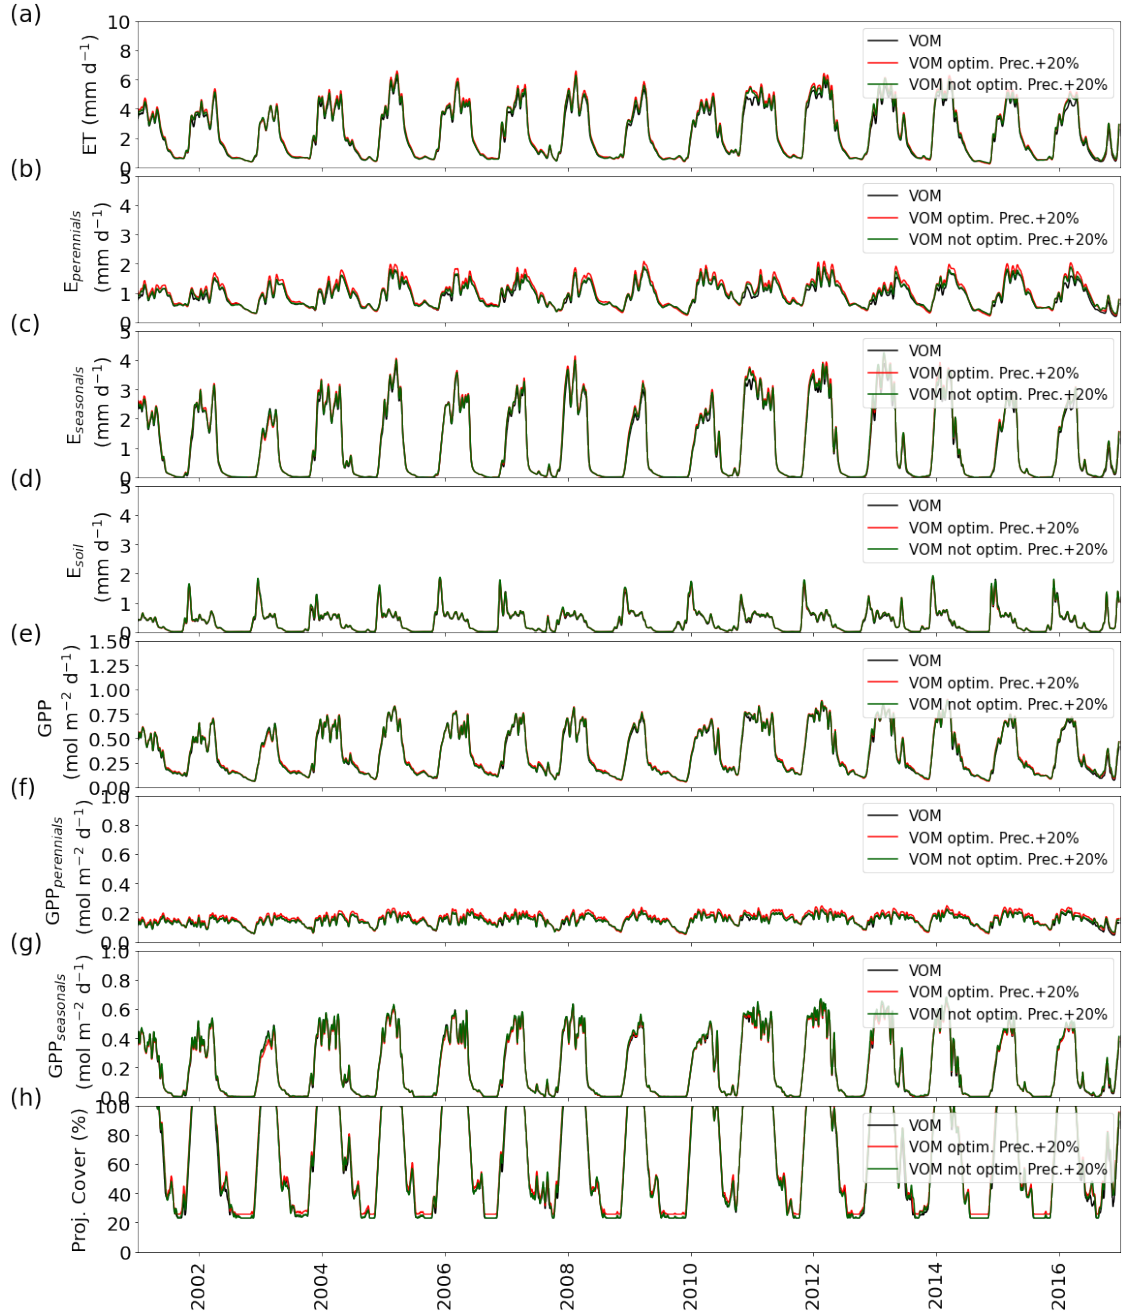

**Figure S1.20.** Fluxes for point 13.5S,132.5E from 2001-2016 (subset from 1980-2016) for a) ET, b) transpiration perennials (trees), c) transpiration seasonals (grasses), d) soil evaporation, e) GPP, f) GPP perennials (trees), g) GPP seasonals (grasses), all smoothed with a moving average of 7 days, for the optimized VOM (black), optimized VOM with increased precipitation (red), and the VOM without optimization and increased precipitation (green).

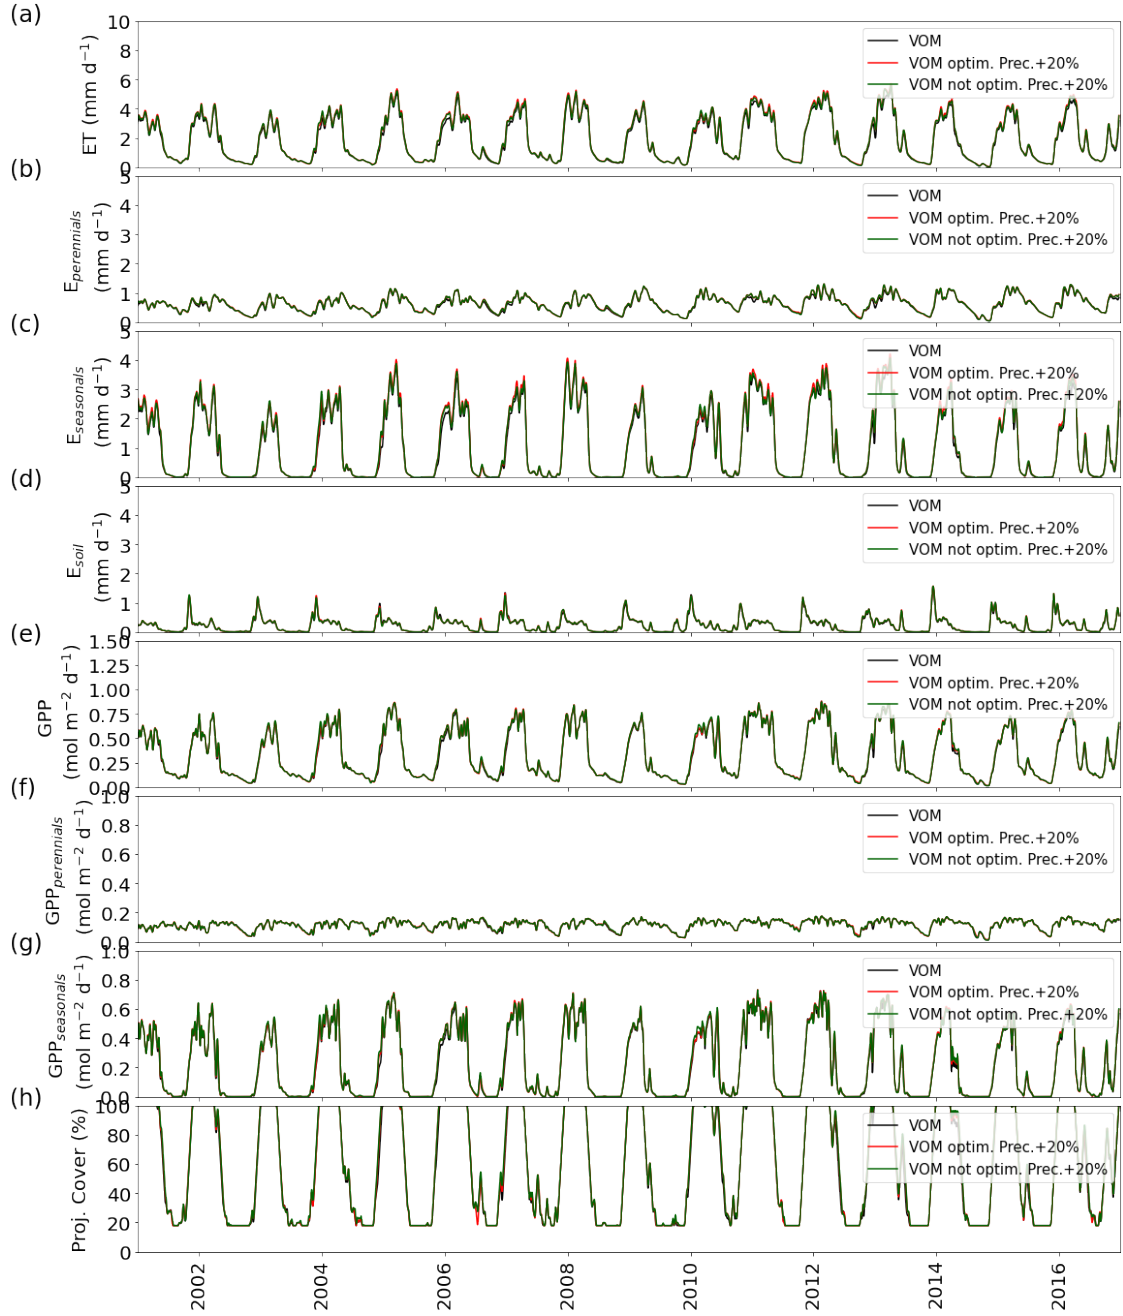

**Figure S1.21.** Fluxes for point 13.5S,133.0E from 2001-2016 (subset from 1980-2016) for a) ET, b) transpiration perennials (trees), c) transpiration seasonals (grasses), d) soil evaporation, e) GPP, f) GPP perennials (trees), g) GPP seasonals (grasses), all smoothed with a moving average of 7 days, for the optimized VOM (black), optimized VOM with increased precipitation (red), and the VOM without optimization and increased precipitation (green).

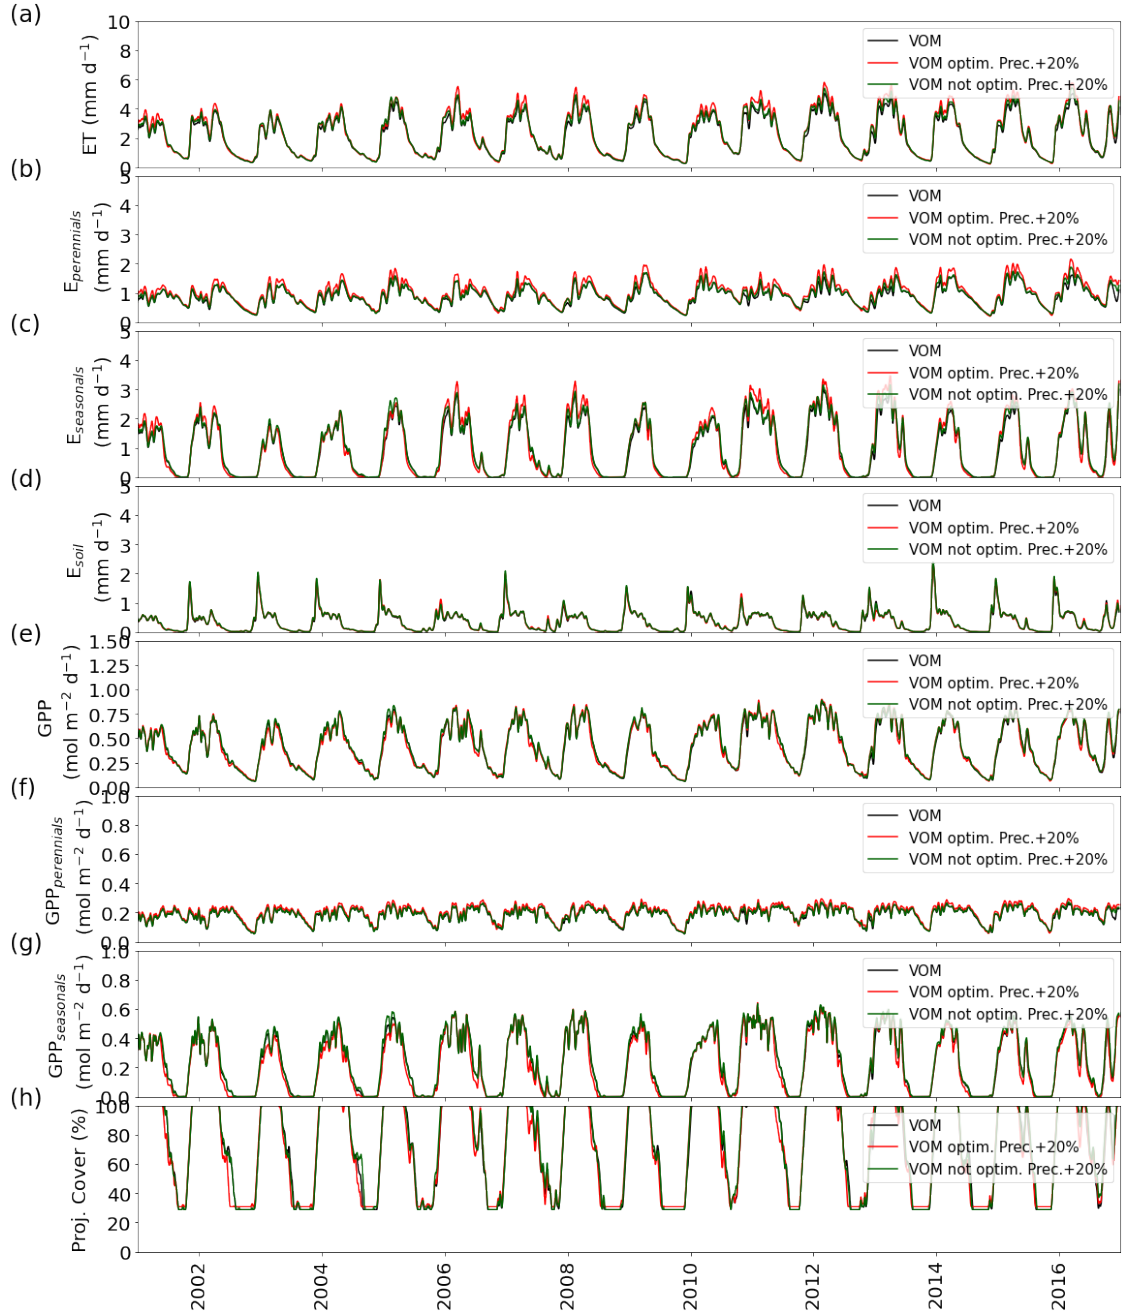

**Figure S1.22.** Fluxes for point 13.5S,133.5E from 2001-2016 (subset from 1980-2016) for a) ET, b) transpiration perennials (trees), c) transpiration seasonals (grasses), d) soil evaporation, e) GPP, f) GPP perennials (trees), g) GPP seasonals (grasses), all smoothed with a moving average of 7 days, for the optimized VOM (black), optimized VOM with increased precipitation (red), and the VOM without optimization and increased precipitation (green).

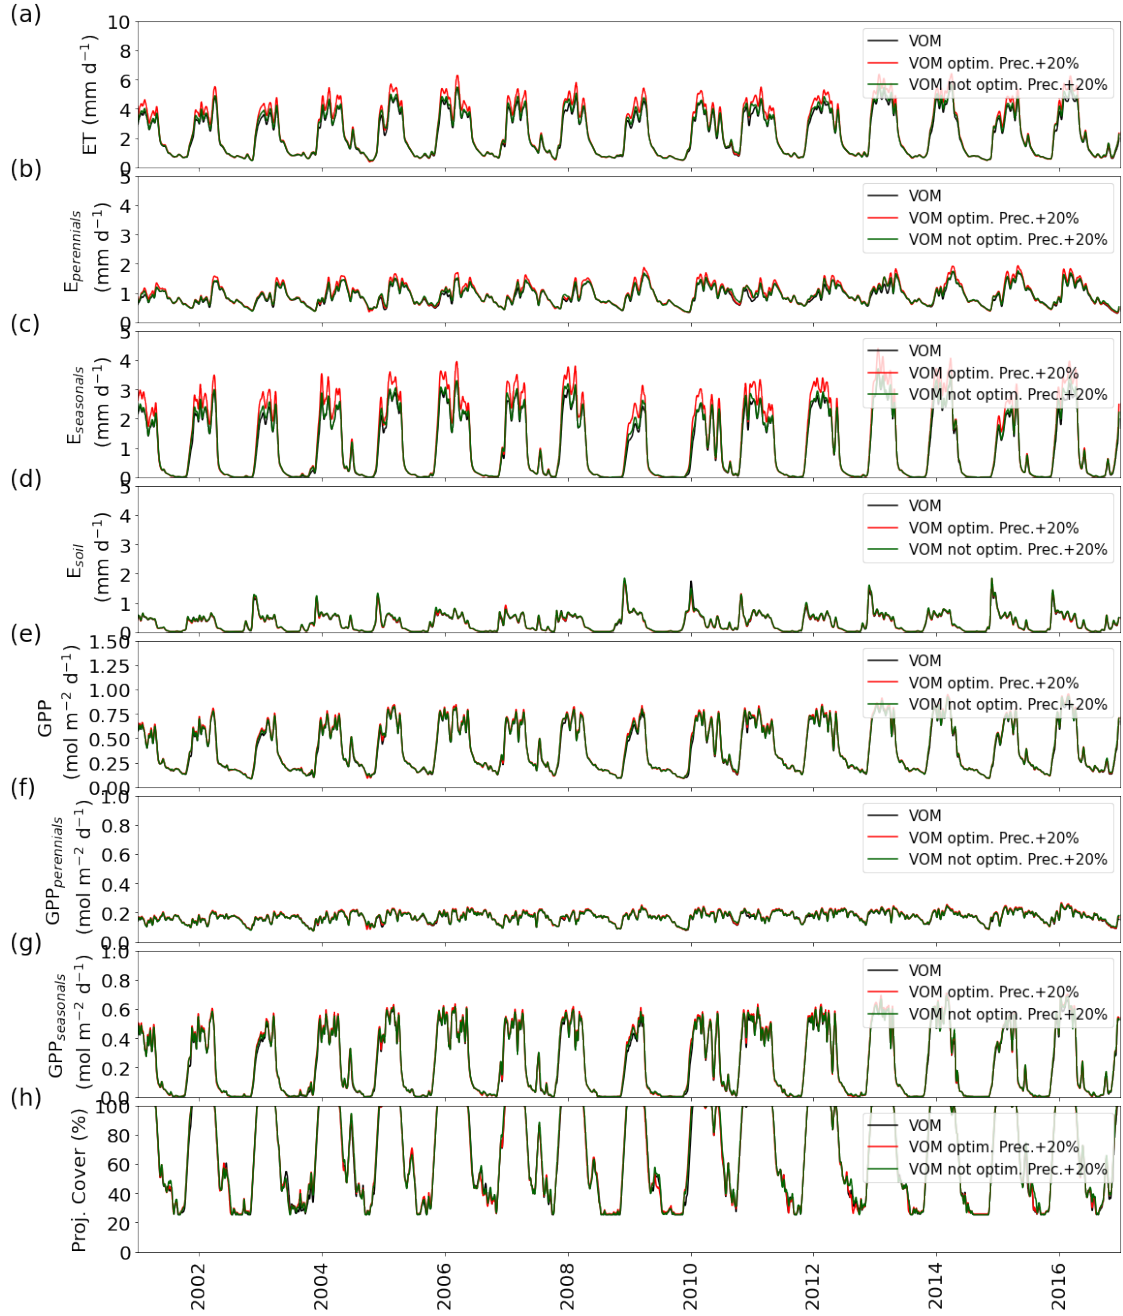

**Figure S1.23.** Fluxes for point 14.5S,131.0E from 2001-2016 (subset from 1980-2016) for a) ET, b) transpiration perennials (trees), c) transpiration seasonals (grasses), d) soil evaporation, e) GPP, f) GPP perennials (trees), g) GPP seasonals (grasses), all smoothed with a moving average of 7 days, for the optimized VOM (black), optimized VOM with increased precipitation (red), and the VOM without optimization and increased precipitation (green).

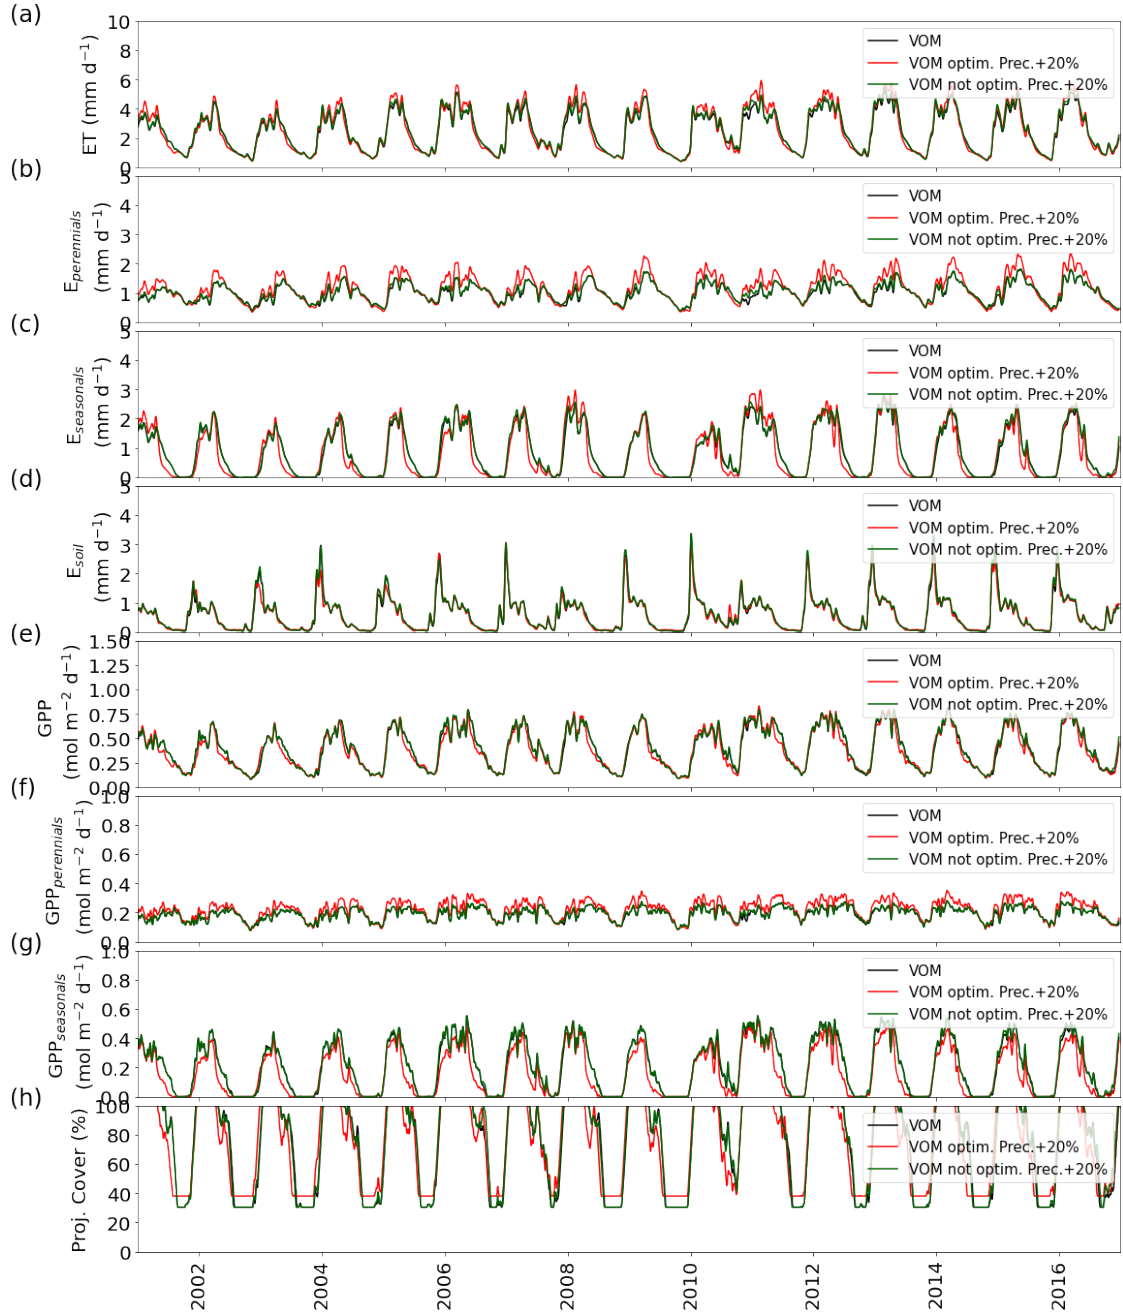

**Figure S1.24.** Fluxes for point 14.5S,131.5E from 2001-2016 (subset from 1980-2016) for a) ET, b) transpiration perennials (trees), c) transpiration seasonals (grasses), d) soil evaporation, e) GPP, f) GPP perennials (trees), g) GPP seasonals (grasses), all smoothed with a moving average of 7 days, for the optimized VOM (black), optimized VOM with increased precipitation (red), and the VOM without optimization and increased precipitation (green).

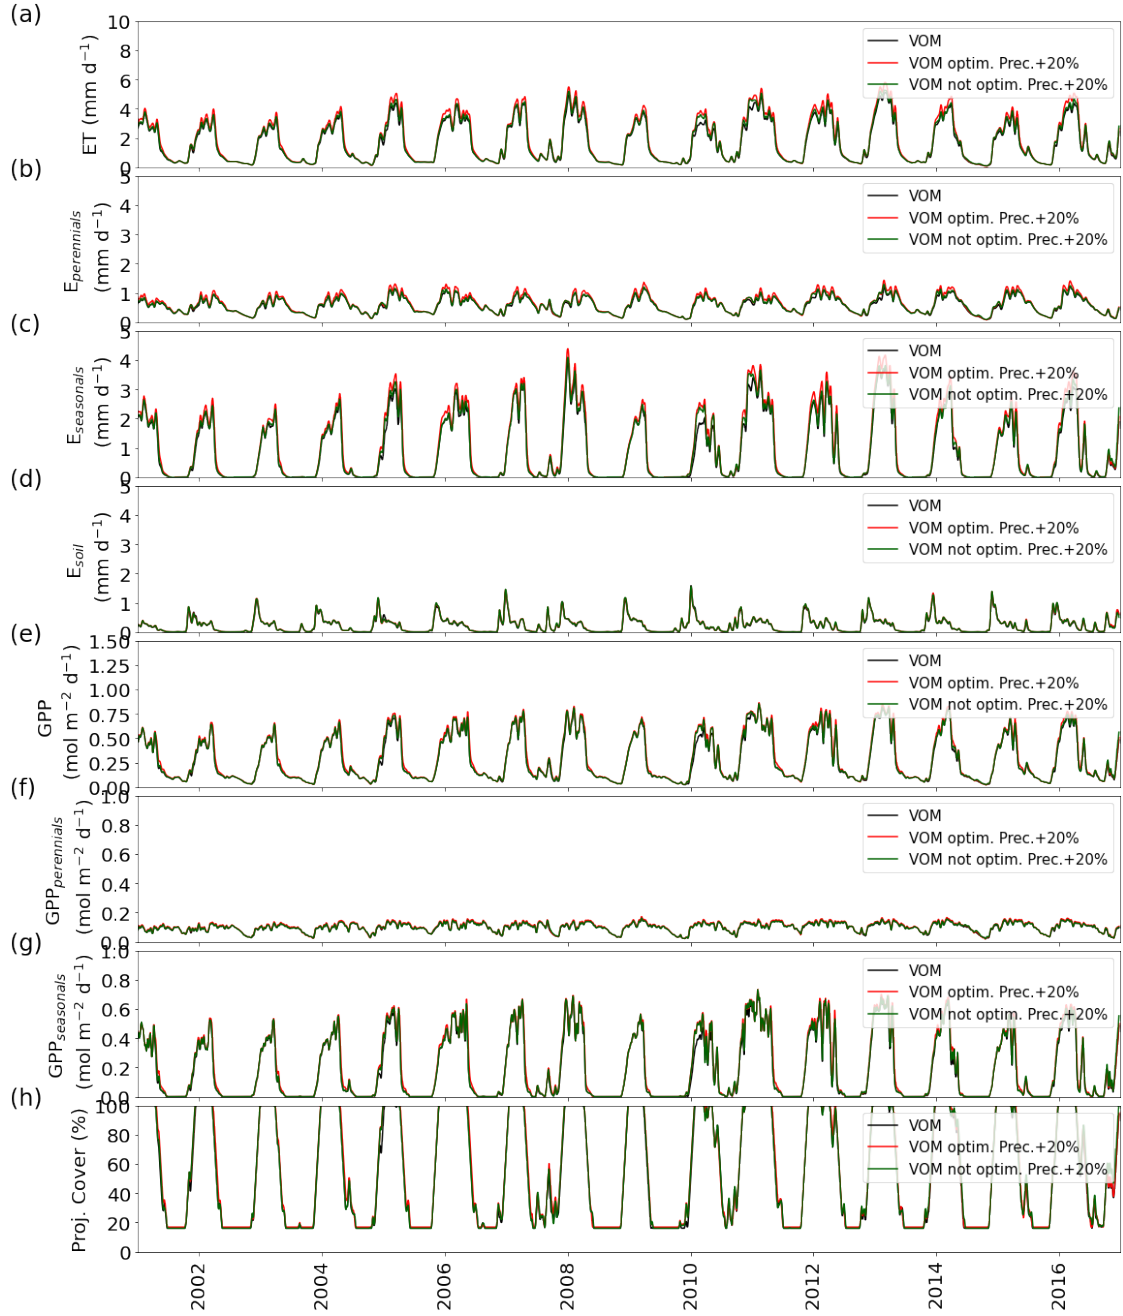

**Figure S1.25.** Fluxes for point 14.5S,132.0E from 2001-2016 (subset from 1980-2016) for a) ET, b) transpiration perennials (trees), c) transpiration seasonals (grasses), d) soil evaporation, e) GPP, f) GPP perennials (trees), g) GPP seasonals (grasses), all smoothed with a moving average of 7 days, for the optimized VOM (black), optimized VOM with increased precipitation (red), and the VOM without optimization and increased precipitation (green).

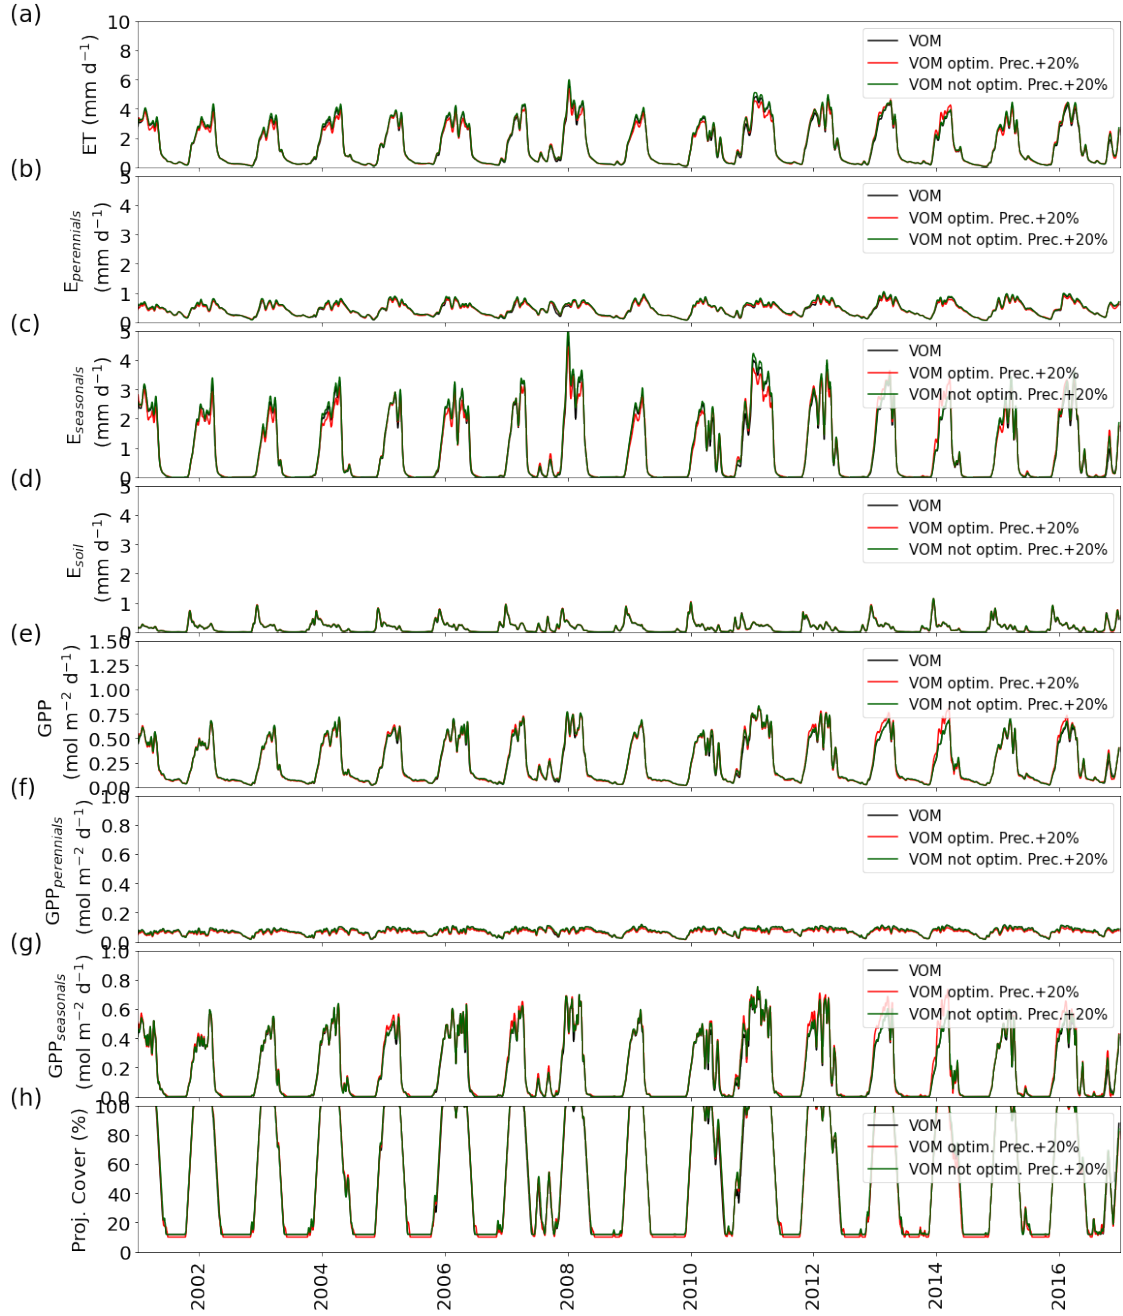

**Figure S1.26.** Fluxes for point 14.5S,132.5E from 2001-2016 (subset from 1980-2016) for a) ET, b) transpiration perennials (trees), c) transpiration seasonals (grasses), d) soil evaporation, e) GPP, f) GPP perennials (trees), g) GPP seasonals (grasses), all smoothed with a moving average of 7 days, for the optimized VOM (black), optimized VOM with increased precipitation (red), and the VOM without optimization and increased precipitation (green).

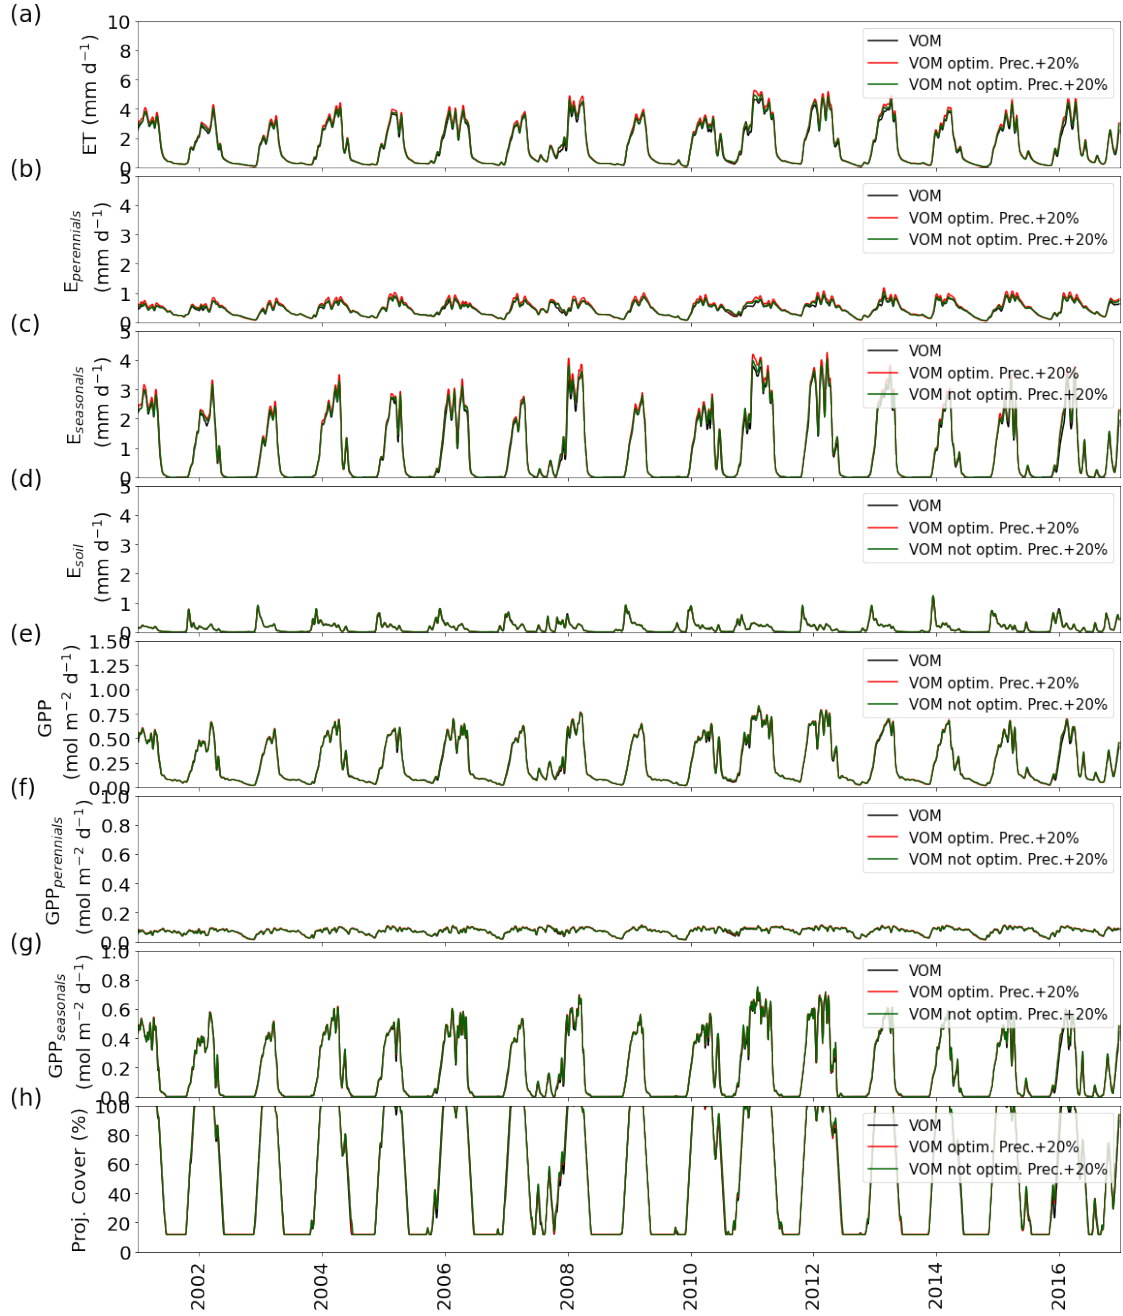

**Figure S1.27.** Fluxes for point 14.5S,133.0E from 2001-2016 (subset from 1980-2016) for a) ET, b) transpiration perennials (trees), c) transpiration seasonals (grasses), d) soil evaporation, e) GPP, f) GPP perennials (trees), g) GPP seasonals (grasses), all smoothed with a moving average of 7 days, for the optimized VOM (black), optimized VOM with increased precipitation (red), and the VOM without optimization and increased precipitation (green).

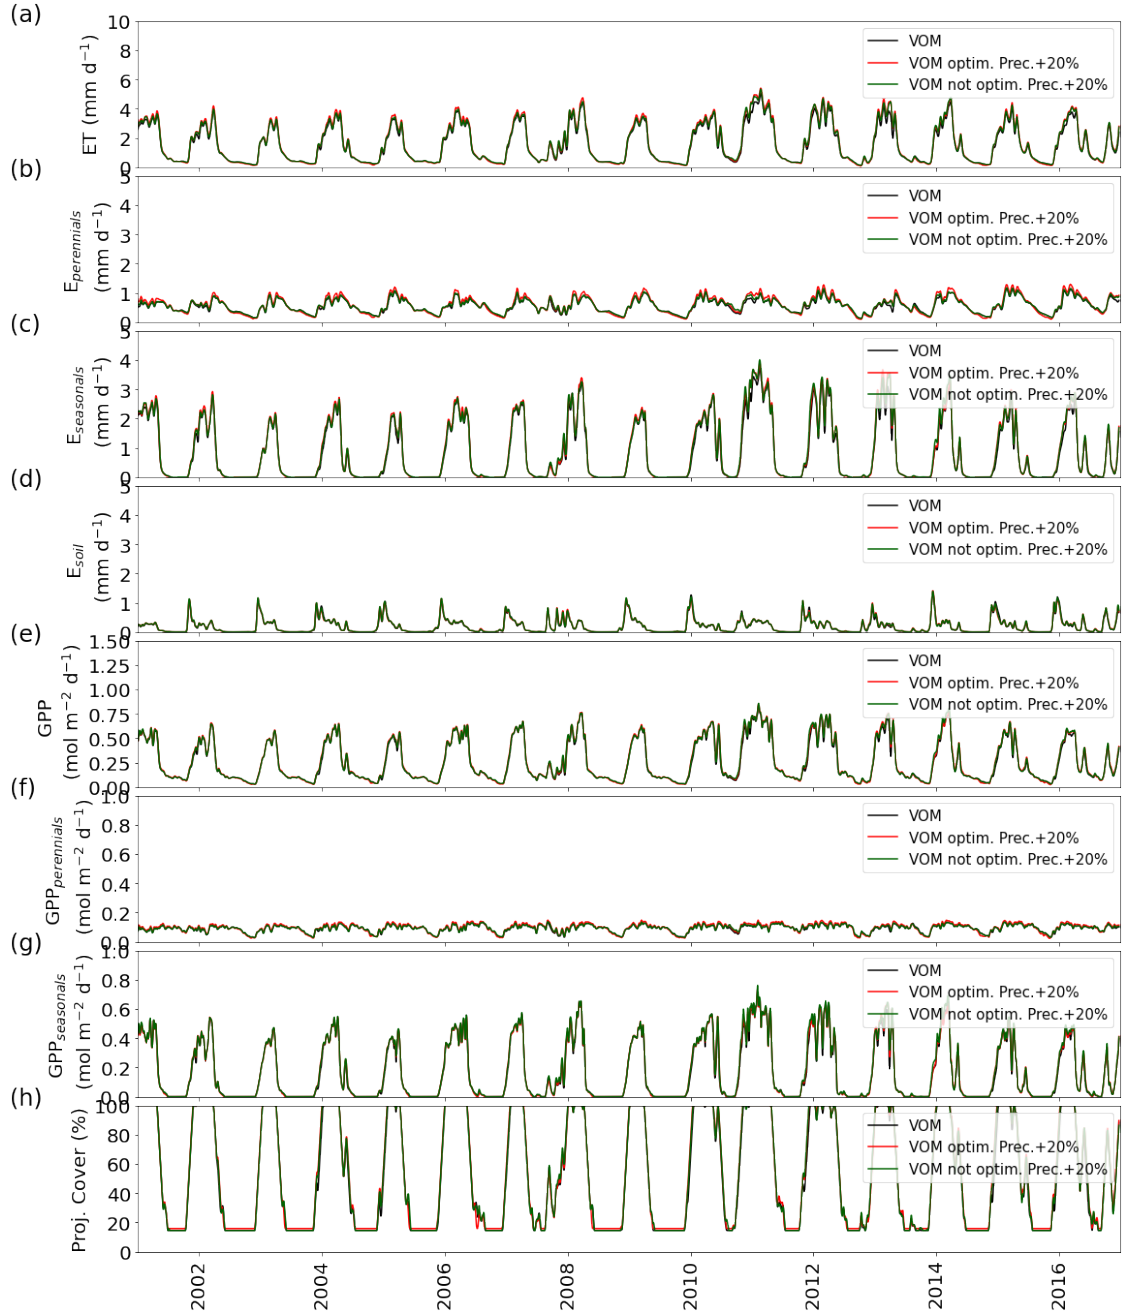

**Figure S1.28.** Fluxes for point 14.5S,133.5E from 2001-2016 (subset from 1980-2016) for a) ET, b) transpiration perennials (trees), c) transpiration seasonals (grasses), d) soil evaporation, e) GPP, f) GPP perennials (trees), g) GPP seasonals (grasses), all smoothed with a moving average of 7 days, for the optimized VOM (black), optimized VOM with increased precipitation (red), and the VOM without optimization and increased precipitation (green).

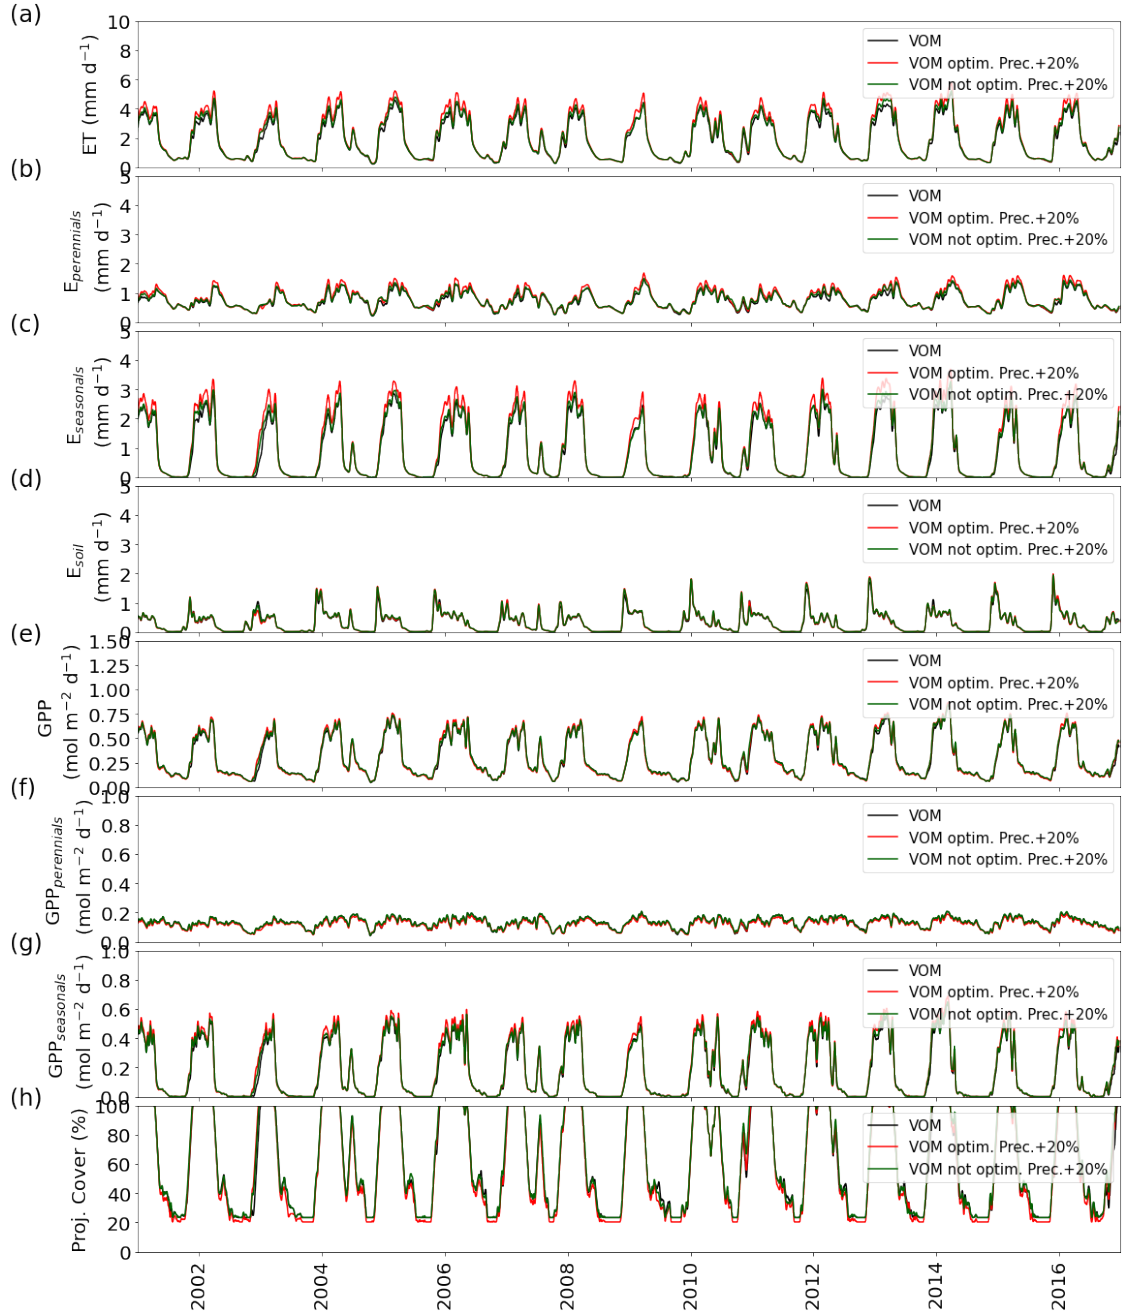

**Figure S1.29.** Fluxes for point 15.5S,131.0E from 2001-2016 (subset from 1980-2016) for a) ET, b) transpiration perennials (trees), c) transpiration seasonals (grasses), d) soil evaporation, e) GPP, f) GPP perennials (trees), g) GPP seasonals (grasses), all smoothed with a moving average of 7 days, for the optimized VOM (black), optimized VOM with increased precipitation (red), and the VOM without optimization and increased precipitation (green).

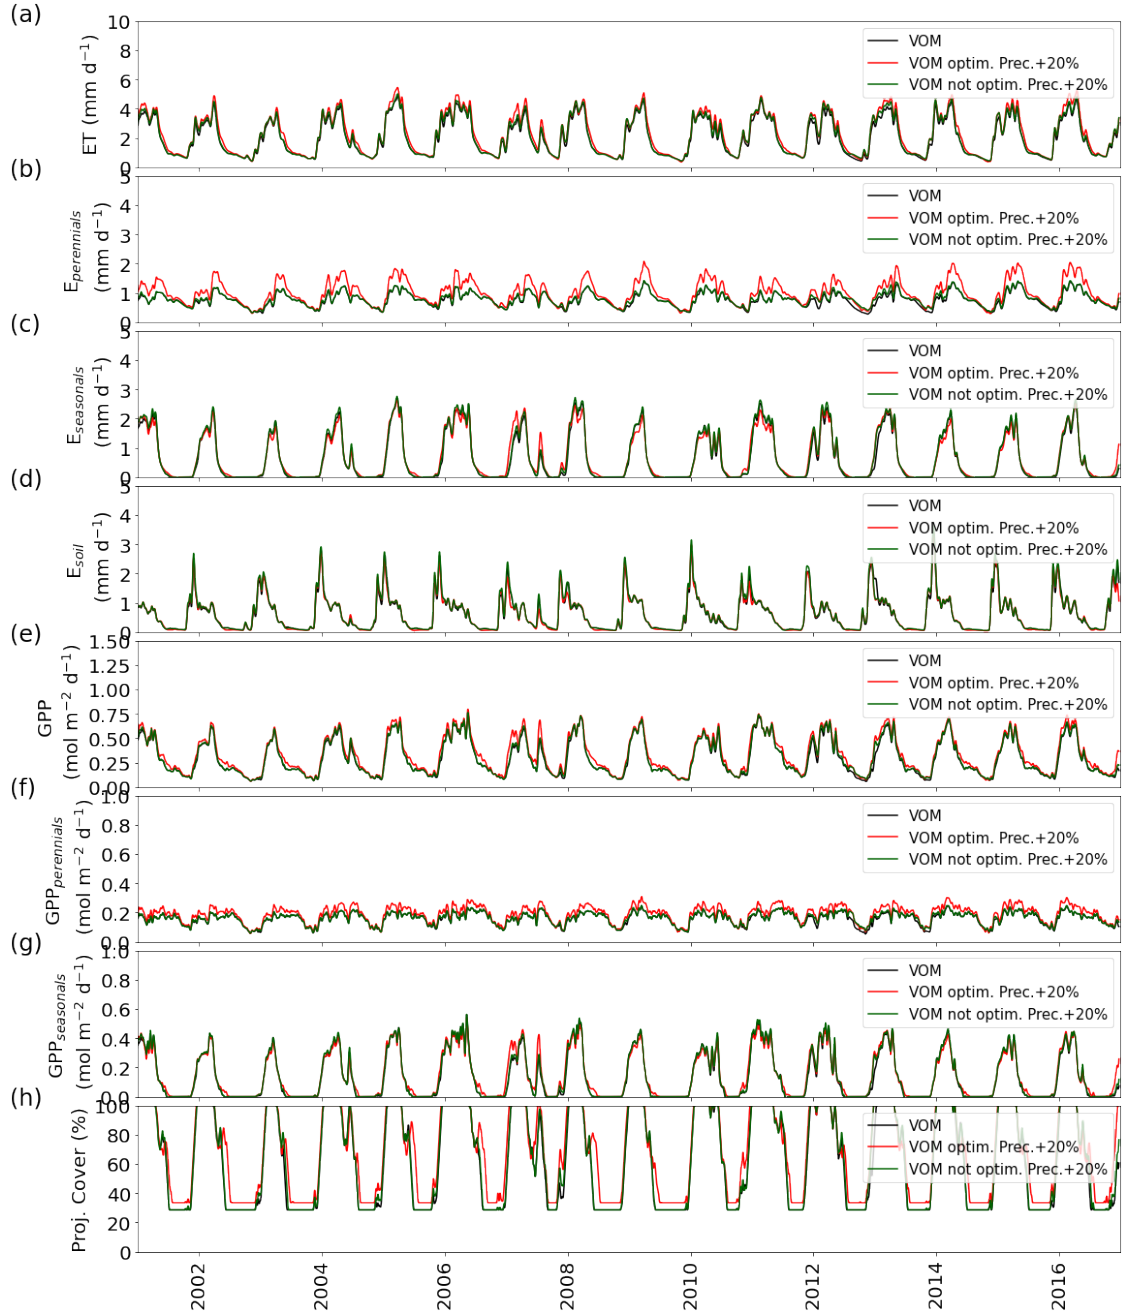

**Figure S1.30.** Fluxes for point 15.5S,131.5E from 2001-2016 (subset from 1980-2016) for a) ET, b) transpiration perennials (trees), c) transpiration seasonals (grasses), d) soil evaporation, e) GPP, f) GPP perennials (trees), g) GPP seasonals (grasses), all smoothed with a moving average of 7 days, for the optimized VOM (black), optimized VOM with increased precipitation (red), and the VOM without optimization and increased precipitation (green).

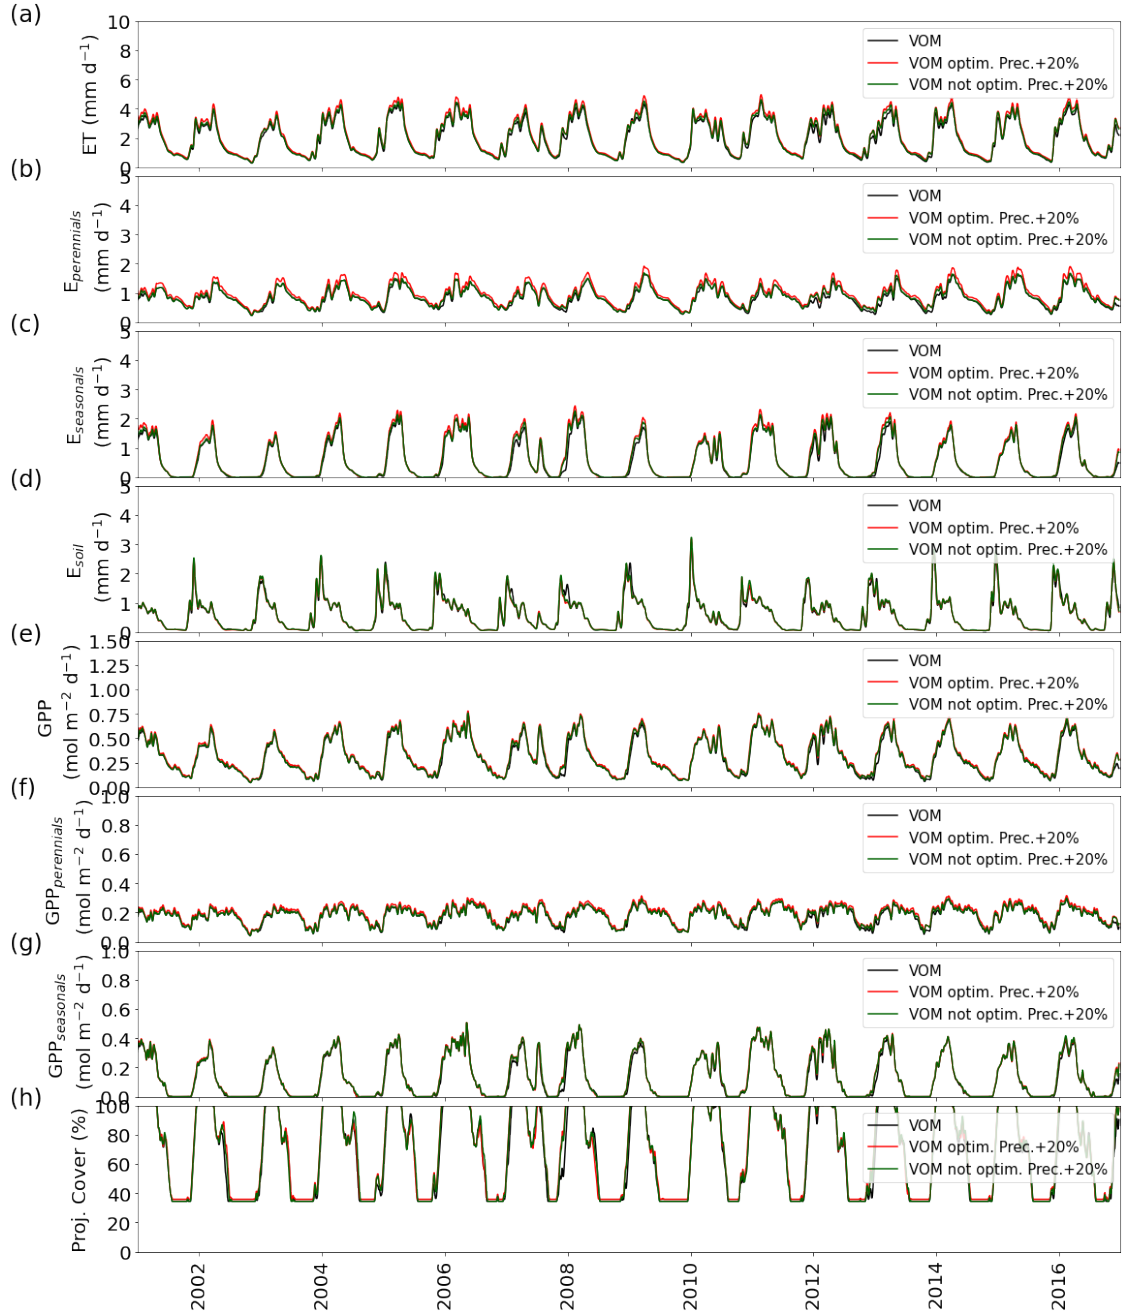

**Figure S1.31.** Fluxes for point 15.5S,132.0E from 2001-2016 (subset from 1980-2016) for a) ET, b) transpiration perennials (trees), c) transpiration seasonals (grasses), d) soil evaporation, e) GPP, f) GPP perennials (trees), g) GPP seasonals (grasses), all smoothed with a moving average of 7 days, for the optimized VOM (black), optimized VOM with increased precipitation (red), and the VOM without optimization and increased precipitation (green).

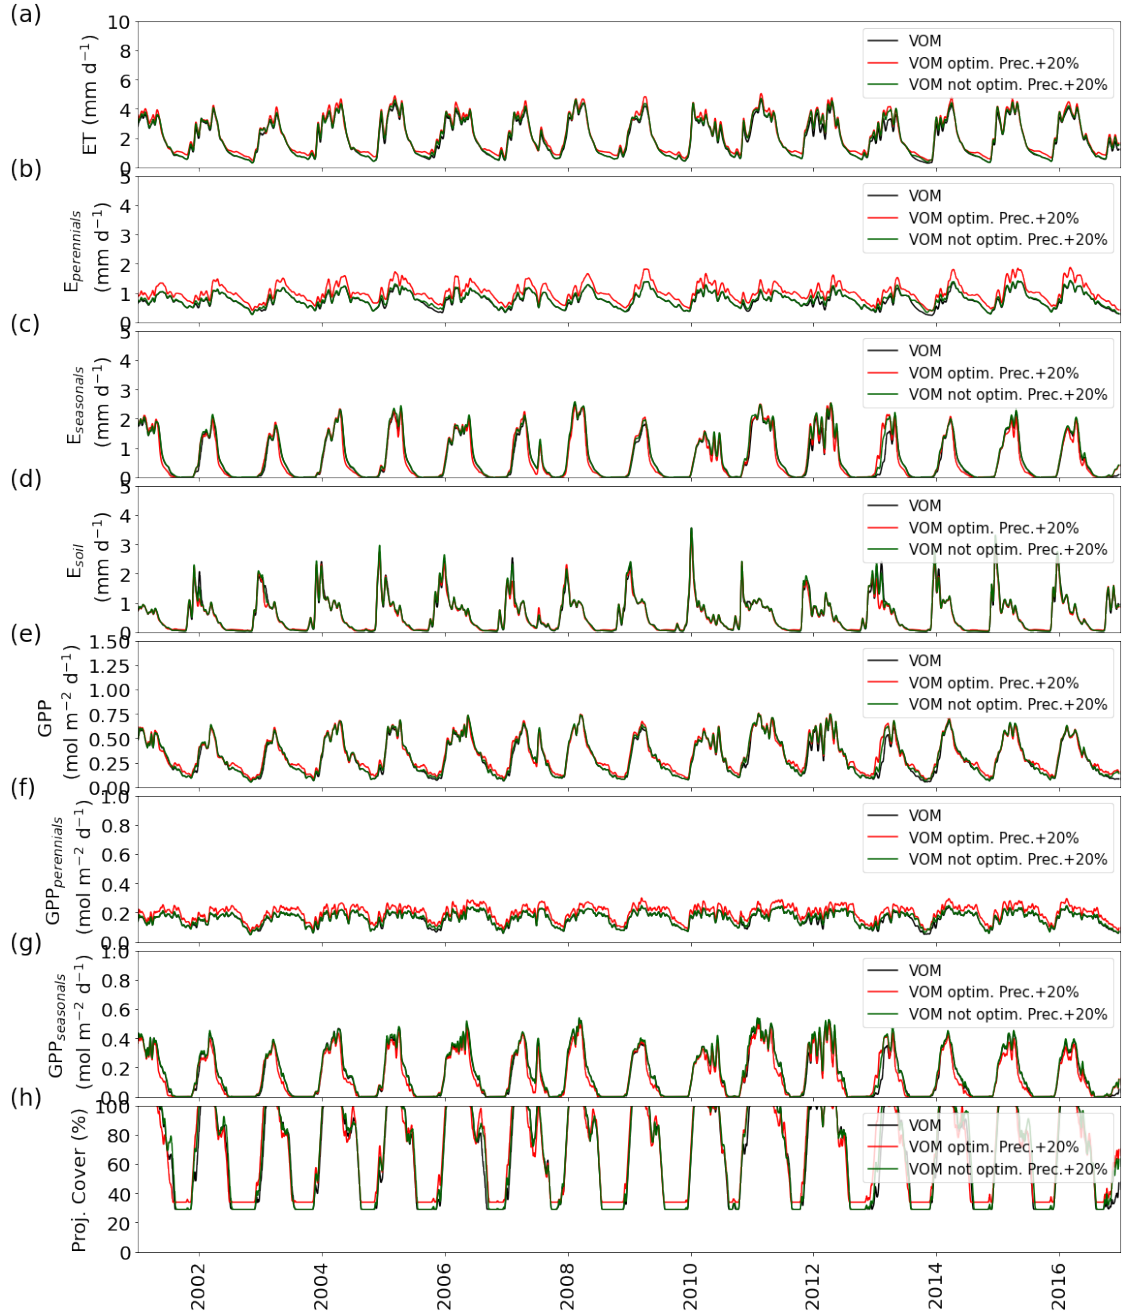

**Figure S1.32.** Fluxes for point 15.5S,132.5E from 2001-2016 (subset from 1980-2016) for a) ET, b) transpiration perennials (trees), c) transpiration seasonals (grasses), d) soil evaporation, e) GPP, f) GPP perennials (trees), g) GPP seasonals (grasses), all smoothed with a moving average of 7 days, for the optimized VOM (black), optimized VOM with increased precipitation (red), and the VOM without optimization and increased precipitation (green).

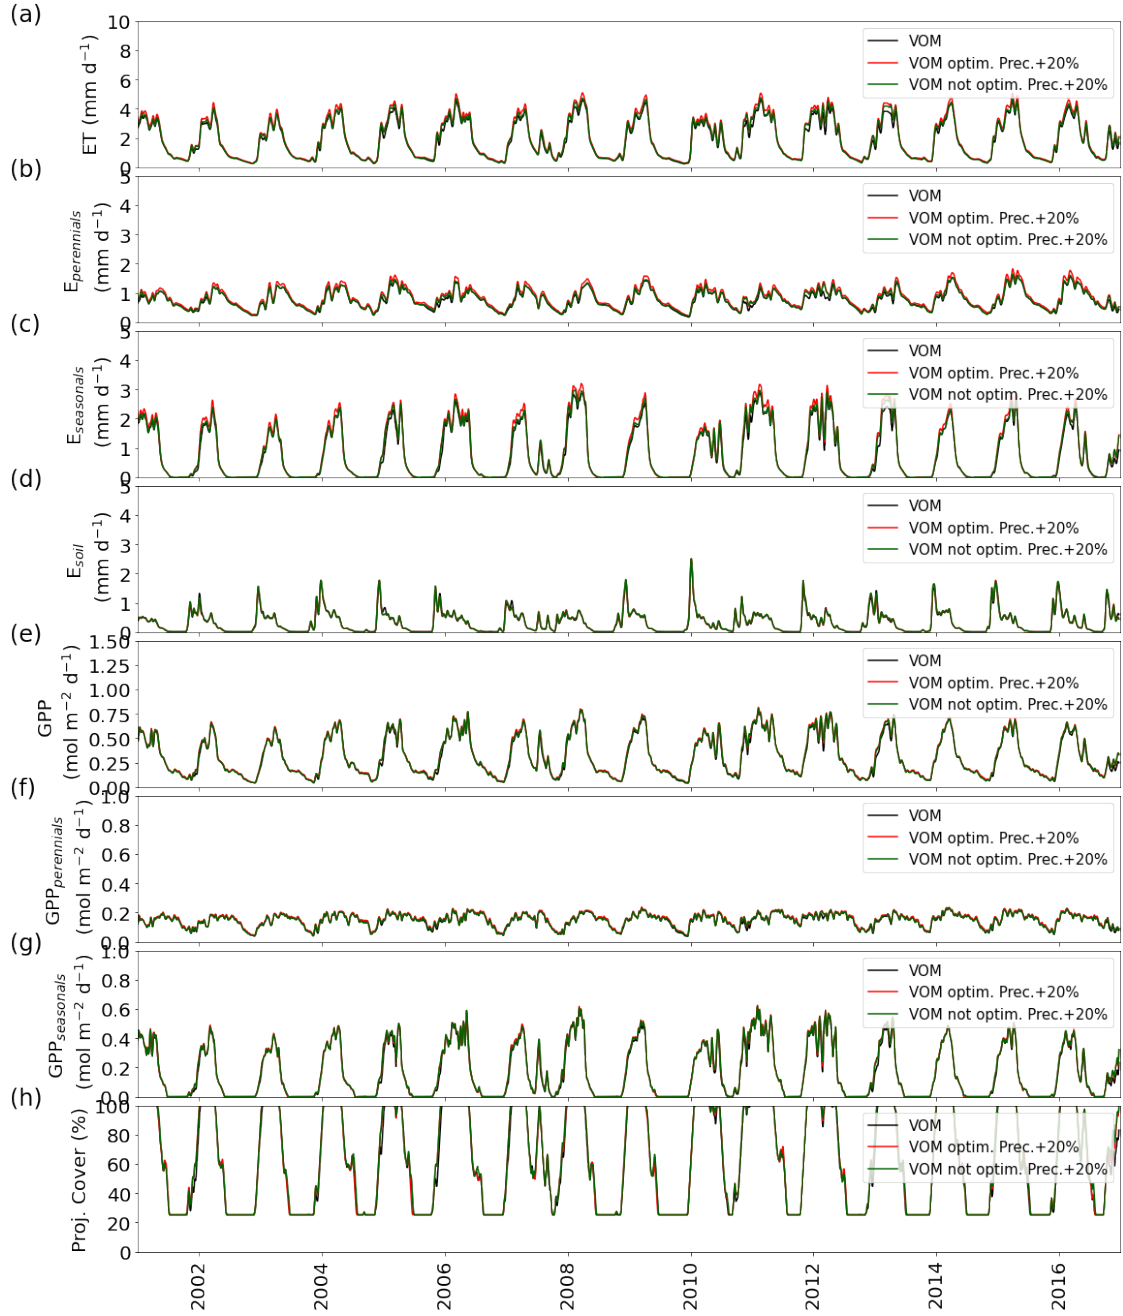

**Figure S1.33.** Fluxes for point 15.5S,133.0E from 2001-2016 (subset from 1980-2016) for a) ET, b) transpiration perennials (trees), c) transpiration seasonals (grasses), d) soil evaporation, e) GPP, f) GPP perennials (trees), g) GPP seasonals (grasses), all smoothed with a moving average of 7 days, for the optimized VOM (black), optimized VOM with increased precipitation (red), and the VOM without optimization and increased precipitation (green).

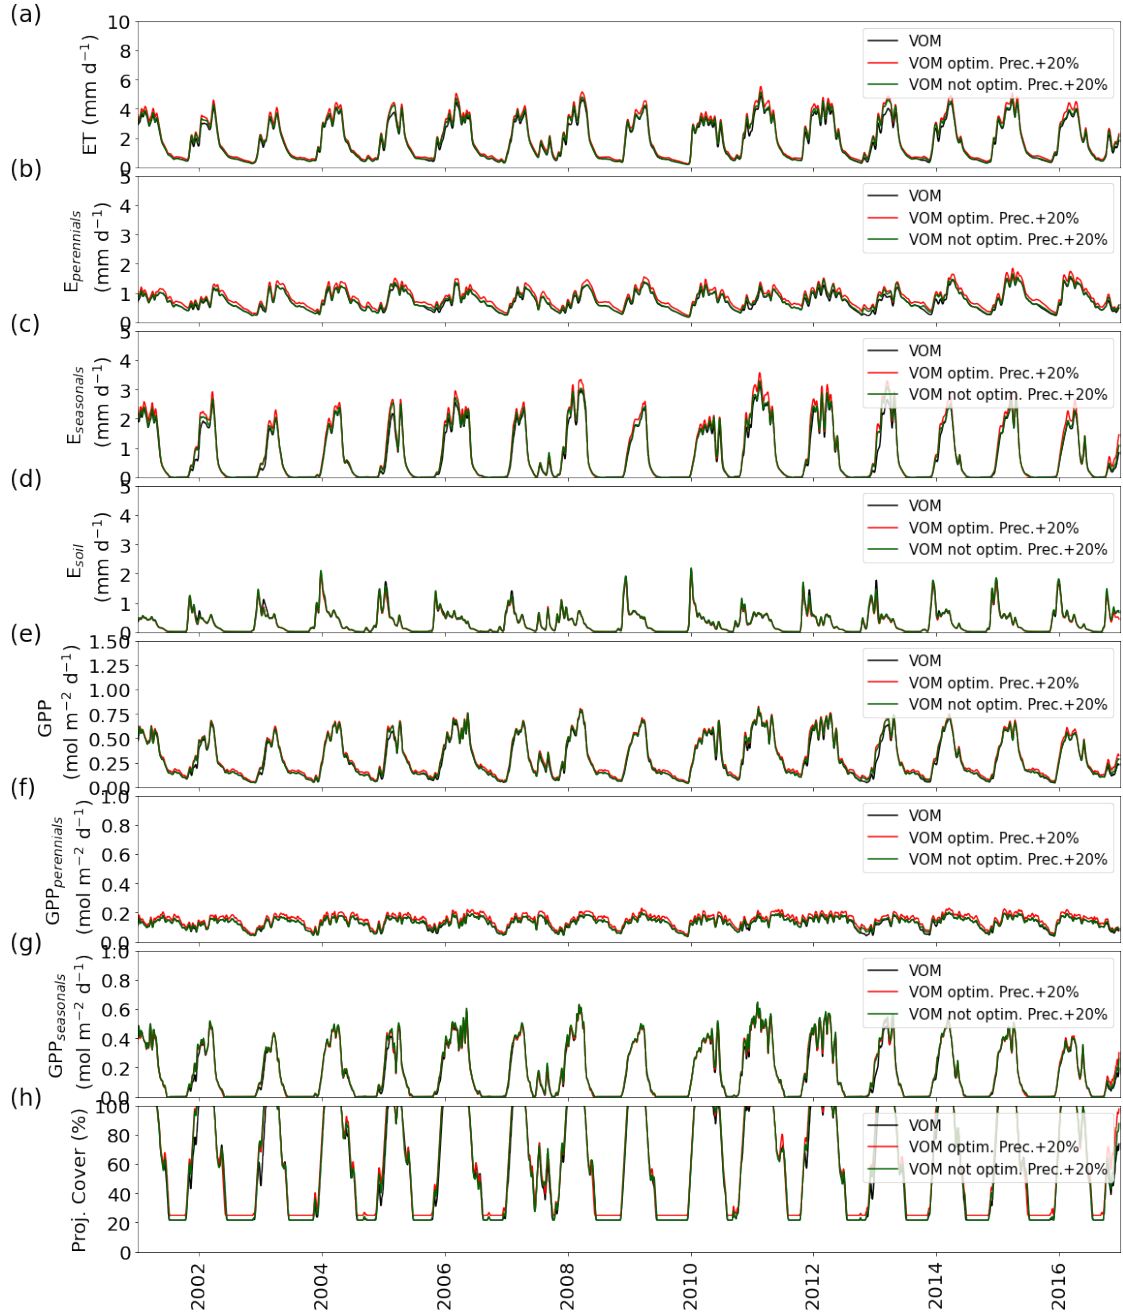

**Figure S1.34.** Fluxes for point 15.5S,133.5E from 2001-2016 (subset from 1980-2016) for a) ET, b) transpiration perennials (trees), c) transpiration seasonals (grasses), d) soil evaporation, e) GPP, f) GPP perennials (trees), g) GPP seasonals (grasses), all smoothed with a moving average of 7 days, for the optimized VOM (black), optimized VOM with increased precipitation (red), and the VOM without optimization and increased precipitation (green).

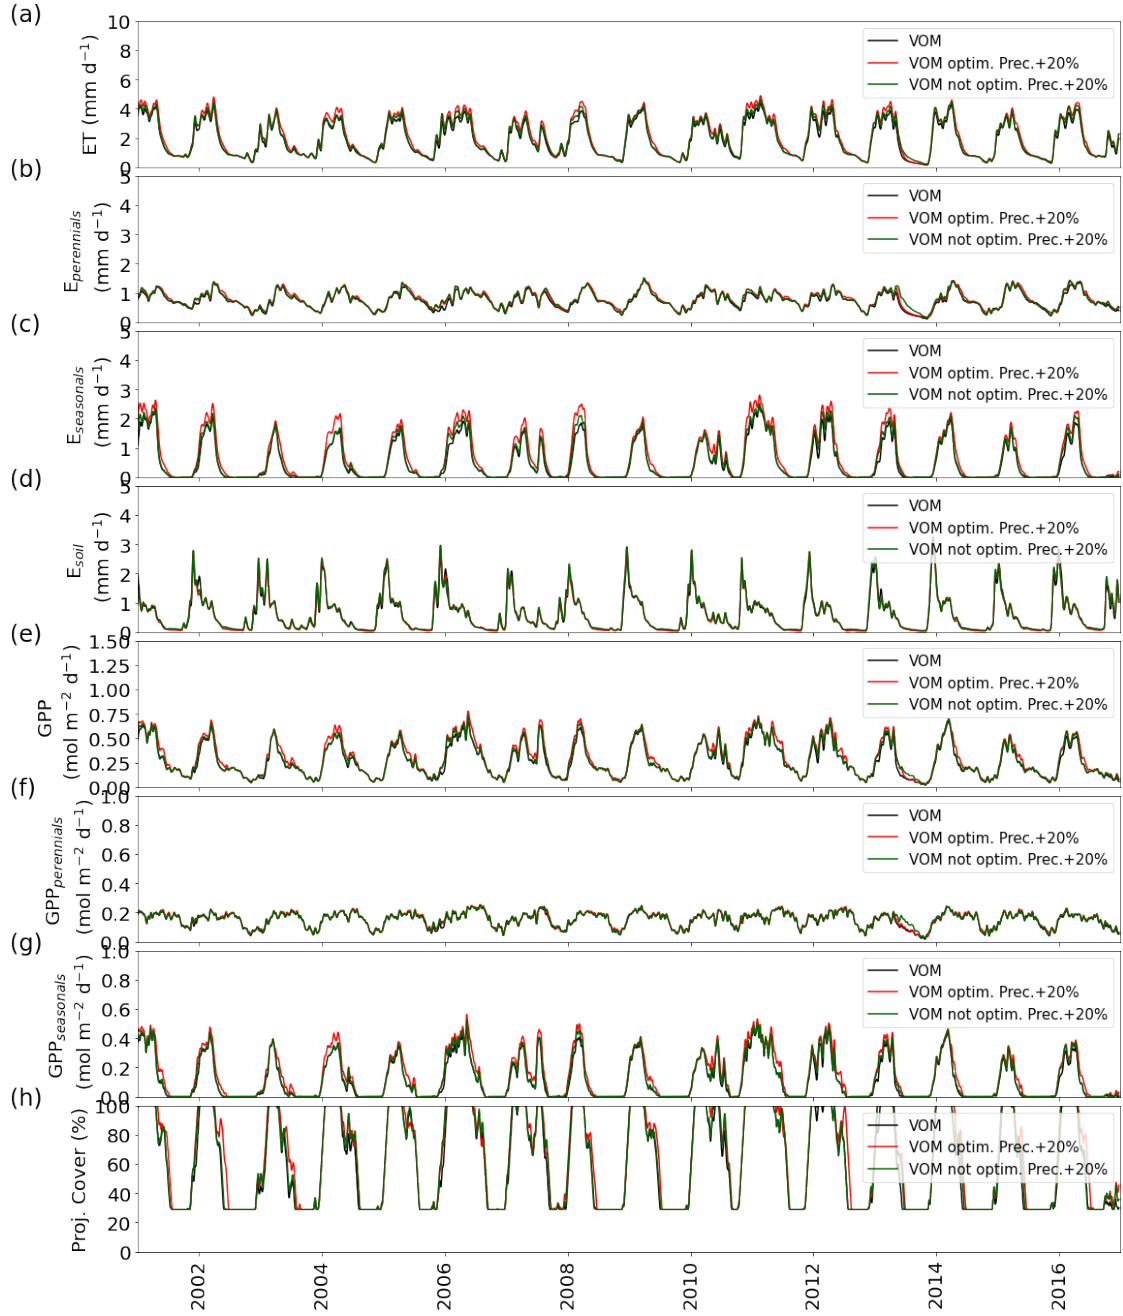

**Figure S1.35.** Fluxes for point 16.5S,131.0E from 2001-2016 (subset from 1980-2016) for a) ET, b) transpiration perennials (trees), c) transpiration seasonals (grasses), d) soil evaporation, e) GPP, f) GPP perennials (trees), g) GPP seasonals (grasses), all smoothed with a moving average of 7 days, for the optimized VOM (black), optimized VOM with increased precipitation (red), and the VOM without optimization and increased precipitation (green).

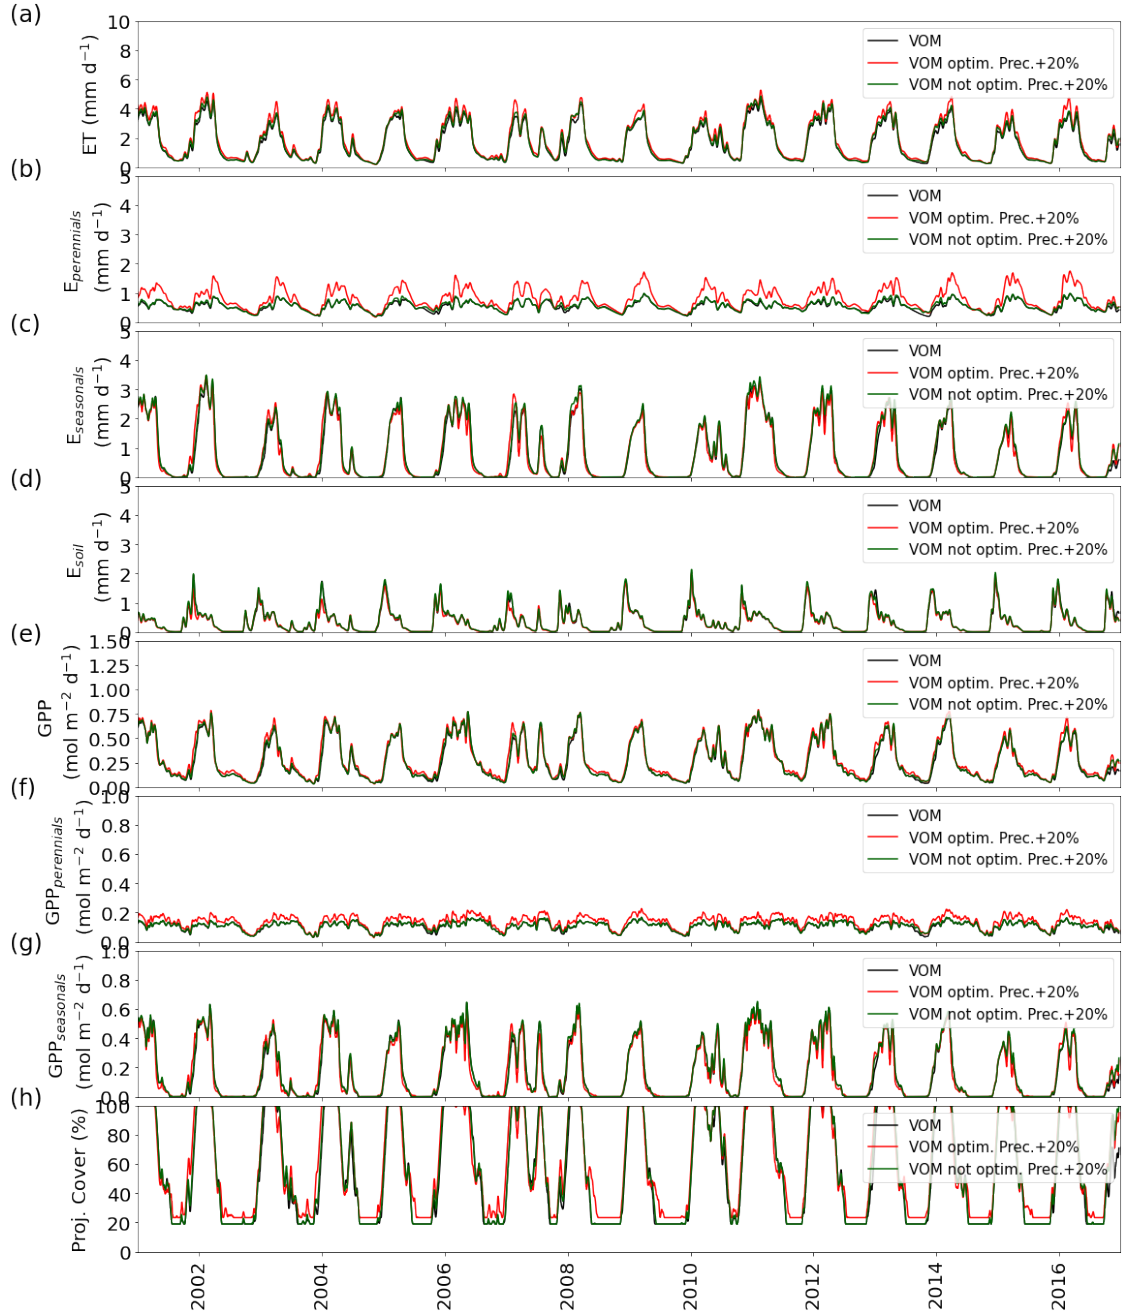

**Figure S1.36.** Fluxes for point 16.5S,131.5E from 2001-2016 (subset from 1980-2016) for a) ET, b) transpiration perennials (trees), c) transpiration seasonals (grasses), d) soil evaporation, e) GPP, f) GPP perennials (trees), g) GPP seasonals (grasses), all smoothed with a moving average of 7 days, for the optimized VOM (black), optimized VOM with increased precipitation (red), and the VOM without optimization and increased precipitation (green).

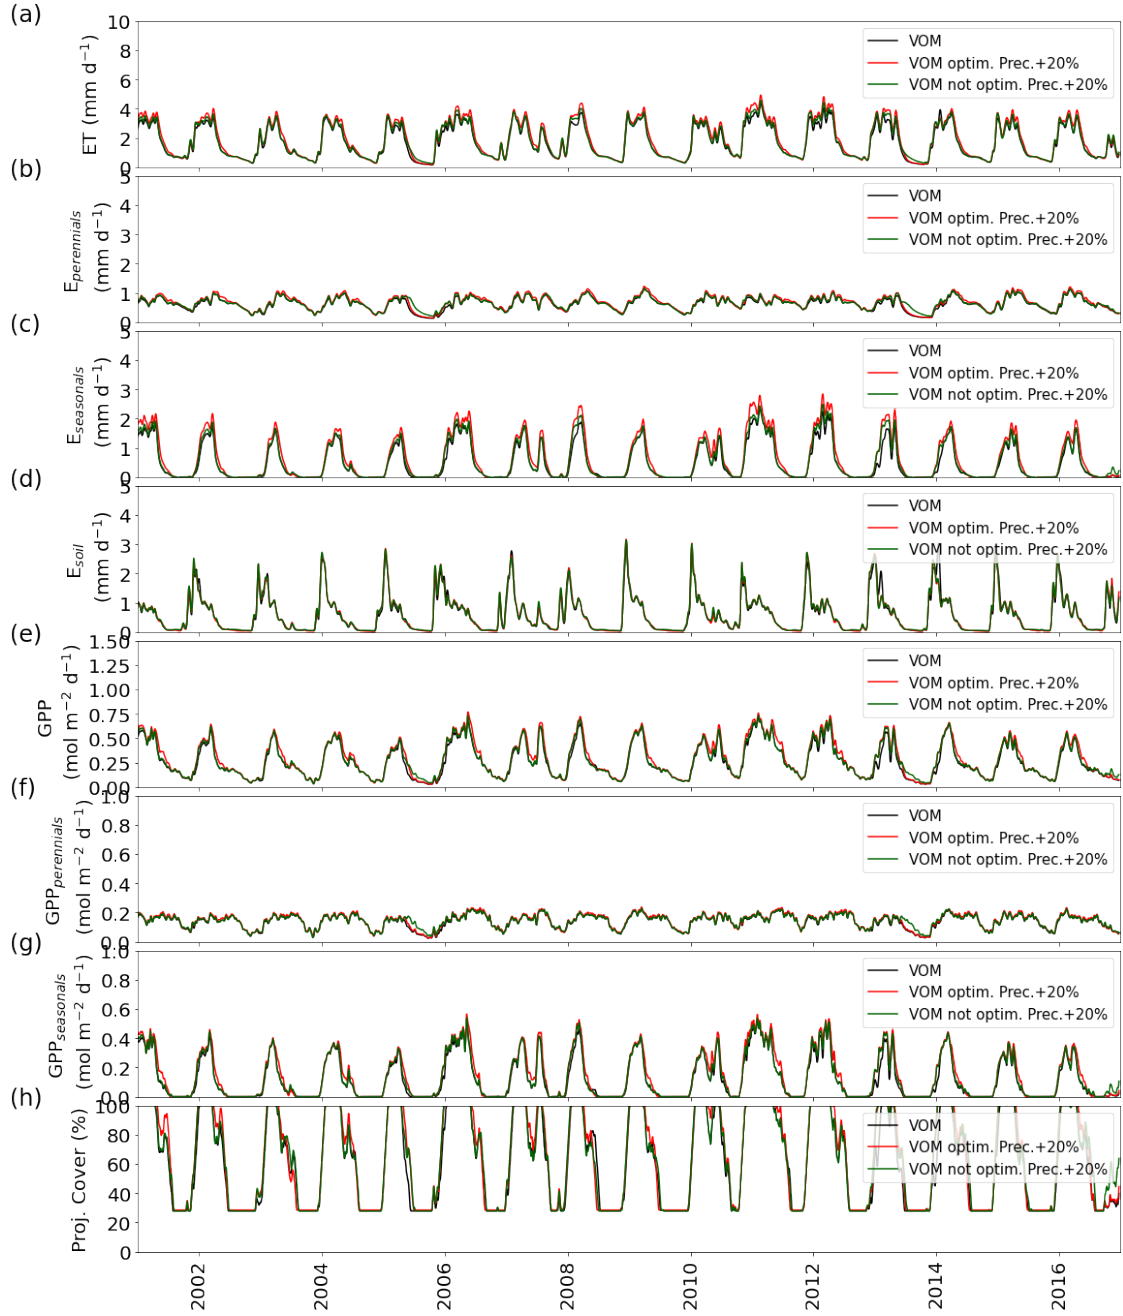

**Figure S1.37.** Fluxes for point 16.5S,132.0E from 2001-2016 (subset from 1980-2016) for a) ET, b) transpiration perennials (trees), c) transpiration seasonals (grasses), d) soil evaporation, e) GPP, f) GPP perennials (trees), g) GPP seasonals (grasses), all smoothed with a moving average of 7 days, for the optimized VOM (black), optimized VOM with increased precipitation (red), and the VOM without optimization and increased precipitation (green).

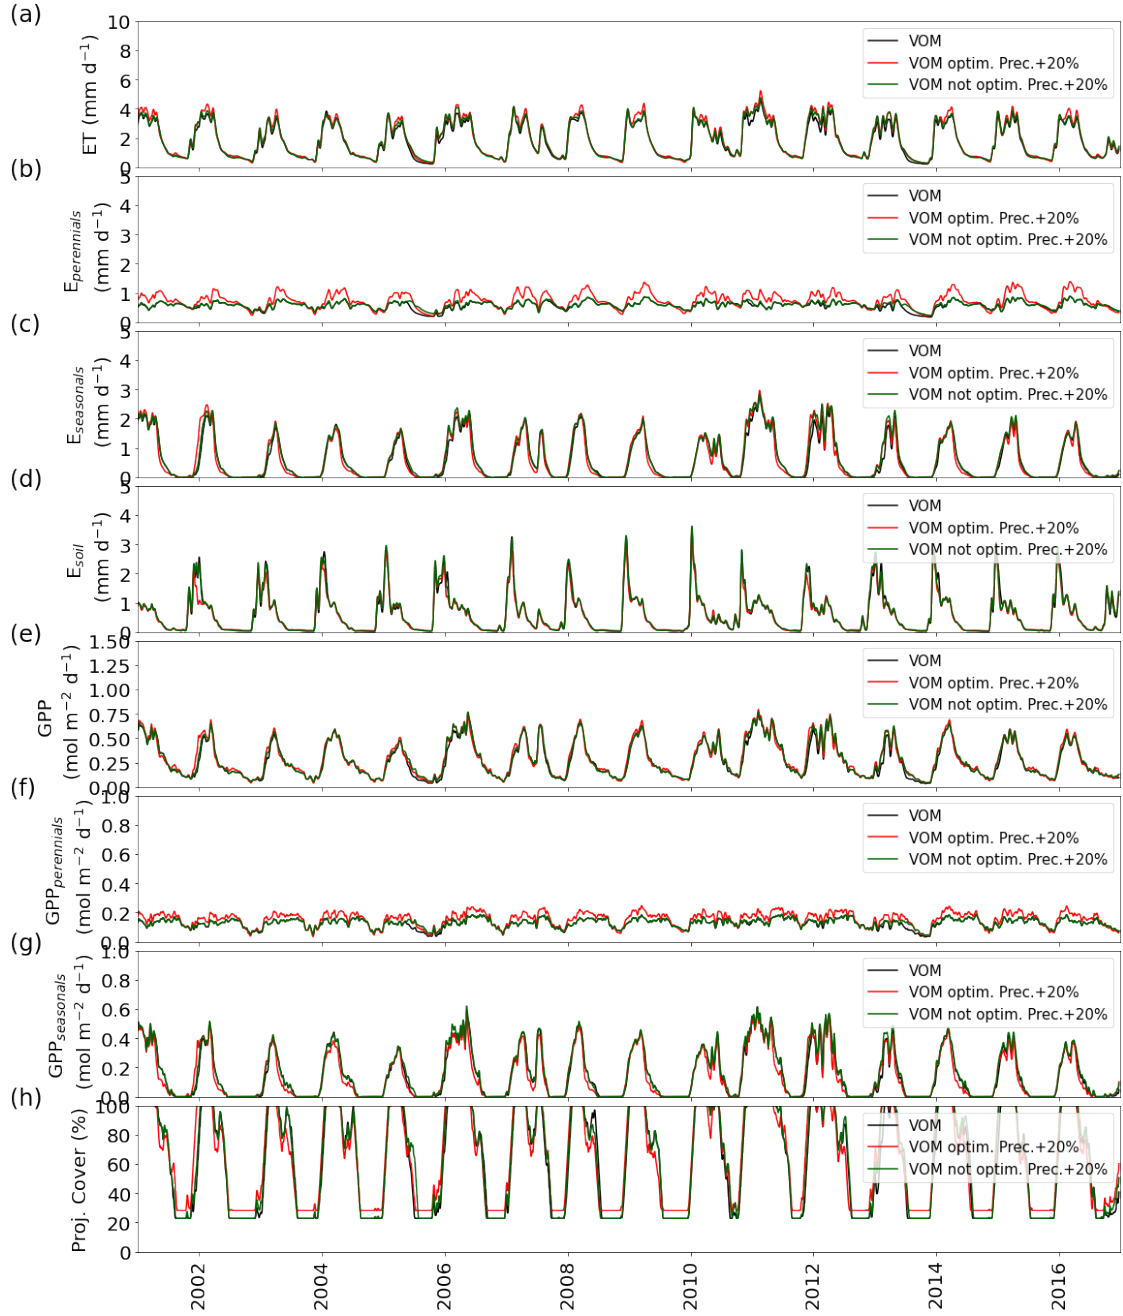

**Figure S1.38.** Fluxes for point 16.5S,132.5E from 2001-2016 (subset from 1980-2016) for a) ET, b) transpiration perennials (trees), c) transpiration seasonals (grasses), d) soil evaporation, e) GPP, f) GPP perennials (trees), g) GPP seasonals (grasses), all smoothed with a moving average of 7 days, for the optimized VOM (black), optimized VOM with increased precipitation (red), and the VOM without optimization and increased precipitation (green).

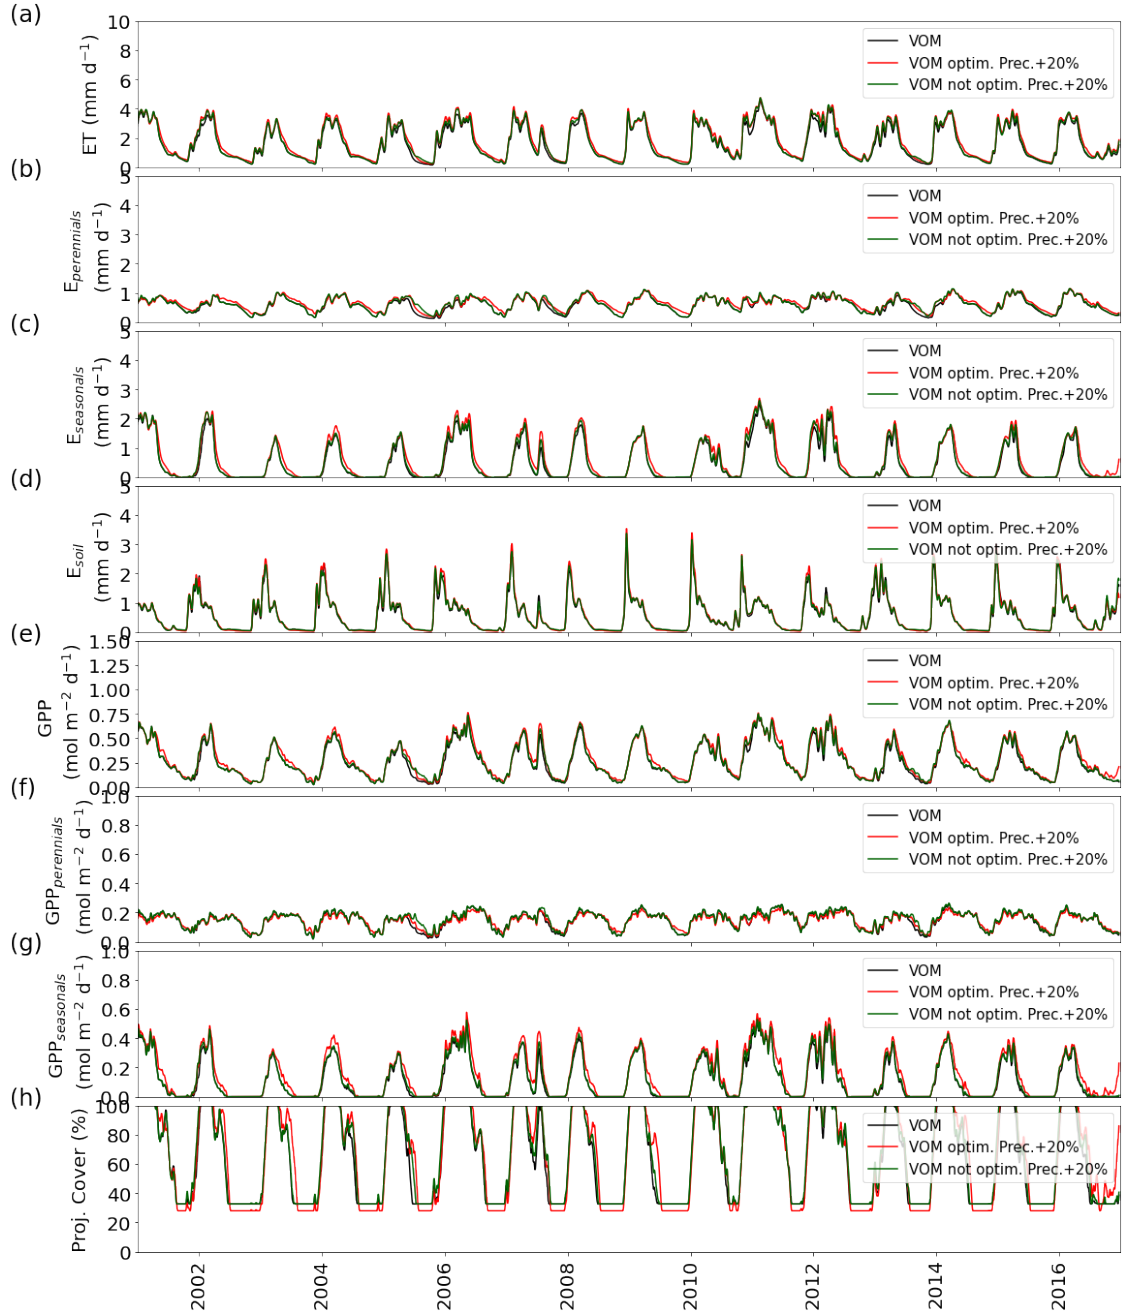

**Figure S1.39.** Fluxes for point 16.5S,133.0E from 2001-2016 (subset from 1980-2016) for a) ET, b) transpiration perennials (trees), c) transpiration seasonals (grasses), d) soil evaporation, e) GPP, f) GPP perennials (trees), g) GPP seasonals (grasses), all smoothed with a moving average of 7 days, for the optimized VOM (black), optimized VOM with increased precipitation (red), and the VOM without optimization and increased precipitation (green).

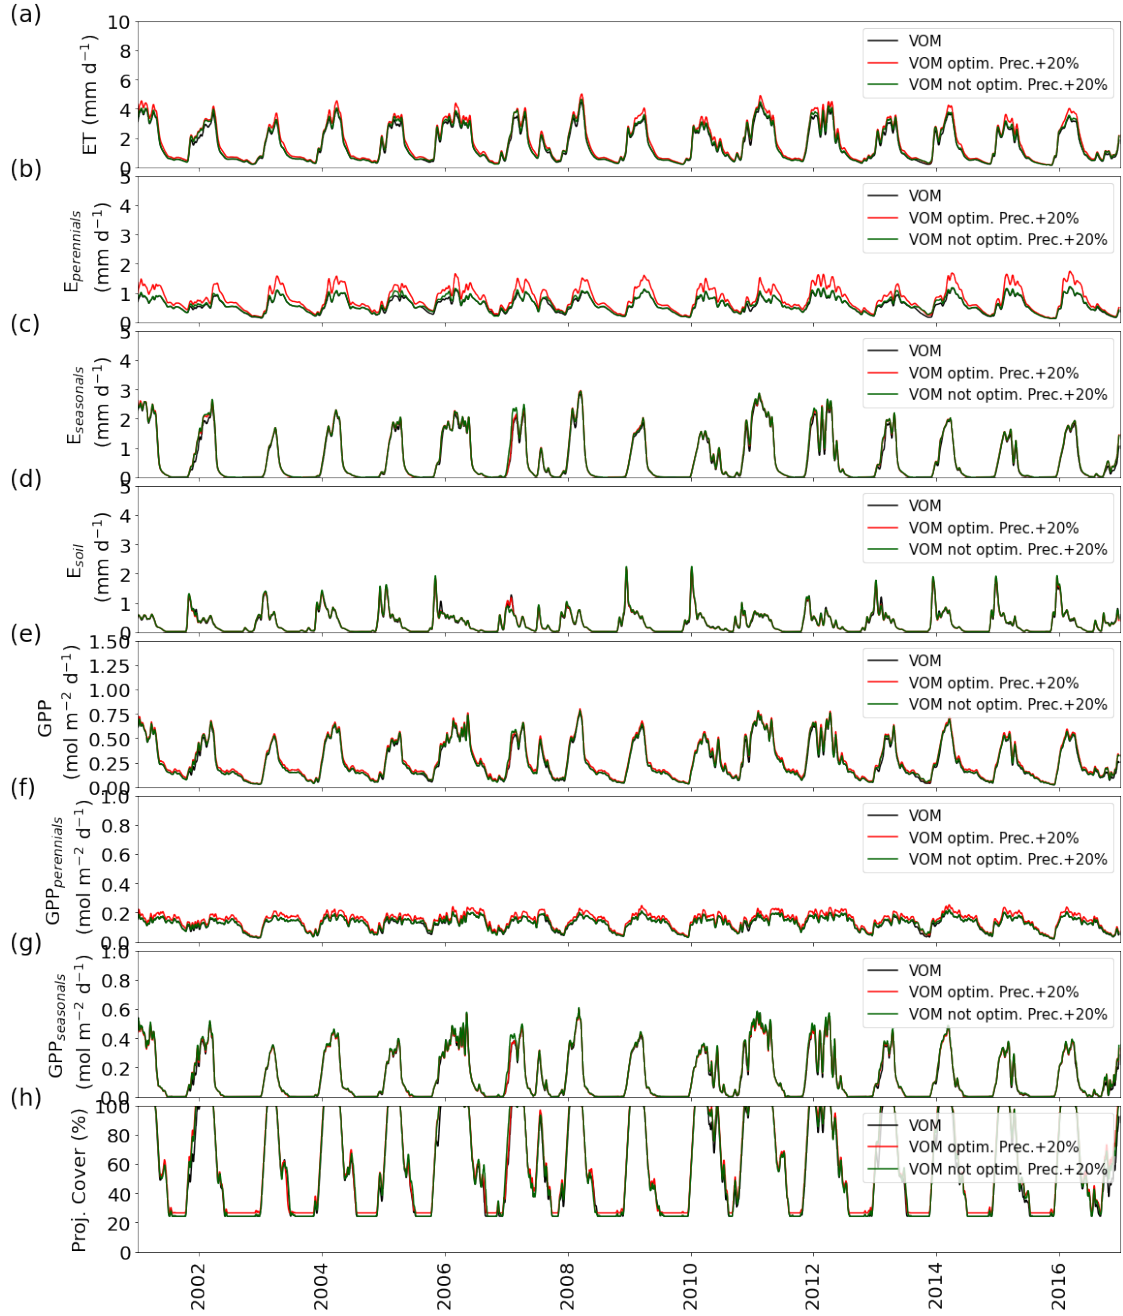

**Figure S1.40.** Fluxes for point 16.5S,133.5E from 2001-2016 (subset from 1980-2016) for a) ET, b) transpiration perennials (trees), c) transpiration seasonals (grasses), d) soil evaporation, e) GPP, f) GPP perennials (trees), g) GPP seasonals (grasses), all smoothed with a moving average of 7 days, for the optimized VOM (black), optimized VOM with increased precipitation (red), and the VOM without optimization and increased precipitation (green).

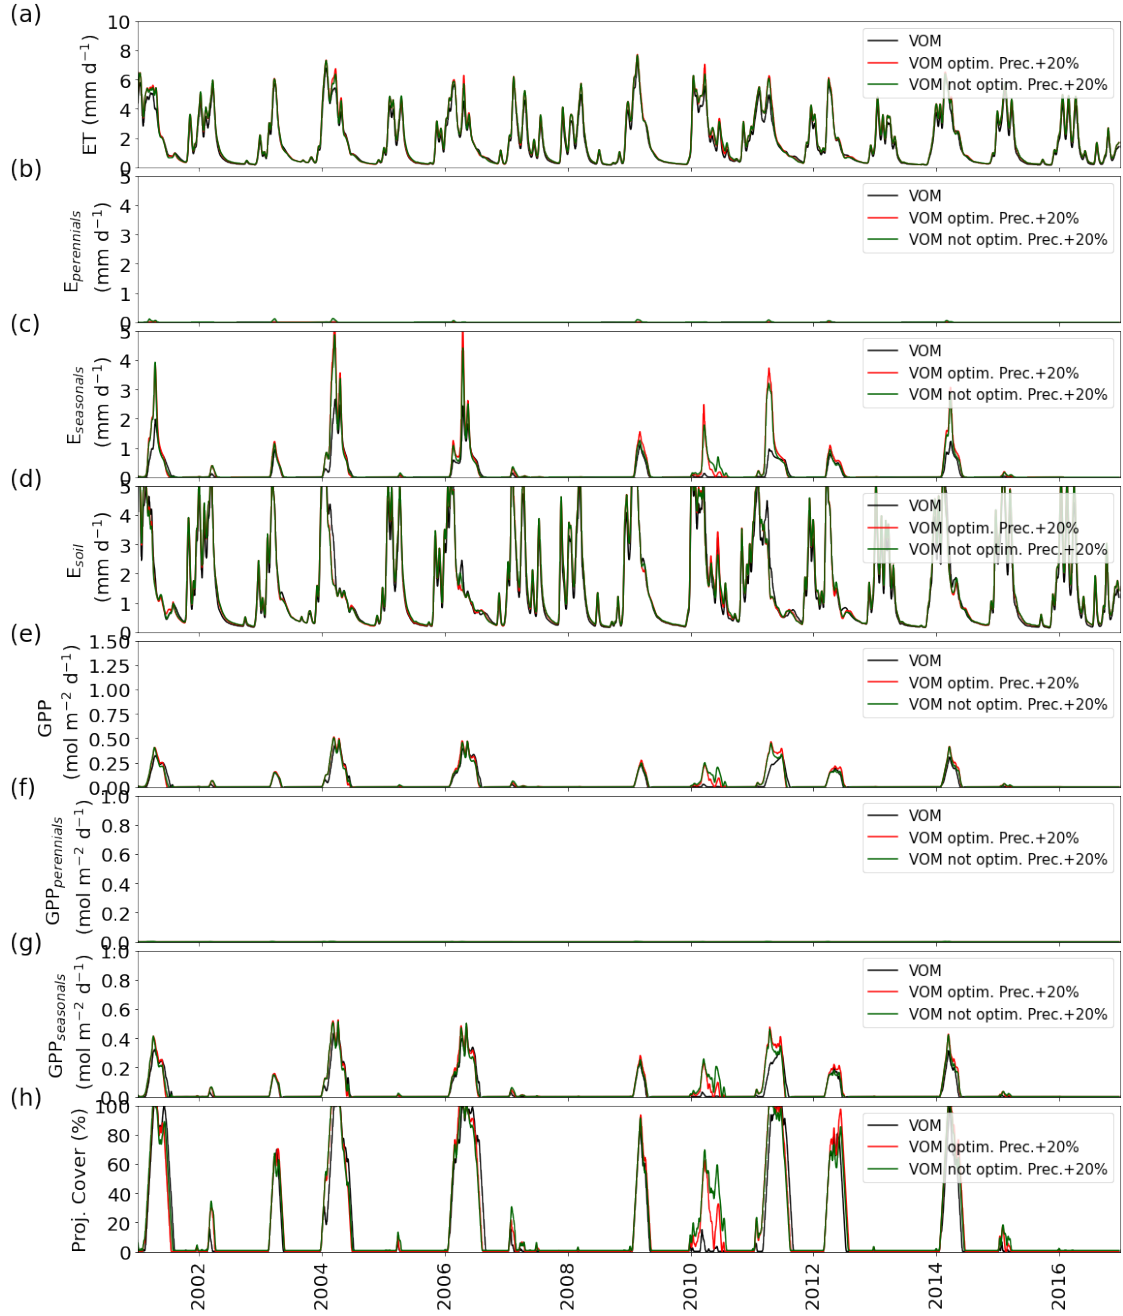

**Figure S1.41.** Fluxes for point 17.5S,131.0E from 2001-2016 (subset from 1980-2016) for a) ET, b) transpiration perennials (trees), c) transpiration seasonals (grasses), d) soil evaporation, e) GPP, f) GPP perennials (trees), g) GPP seasonals (grasses), all smoothed with a moving average of 7 days, for the optimized VOM (black), optimized VOM with increased precipitation (red), and the VOM without optimization and increased precipitation (green).

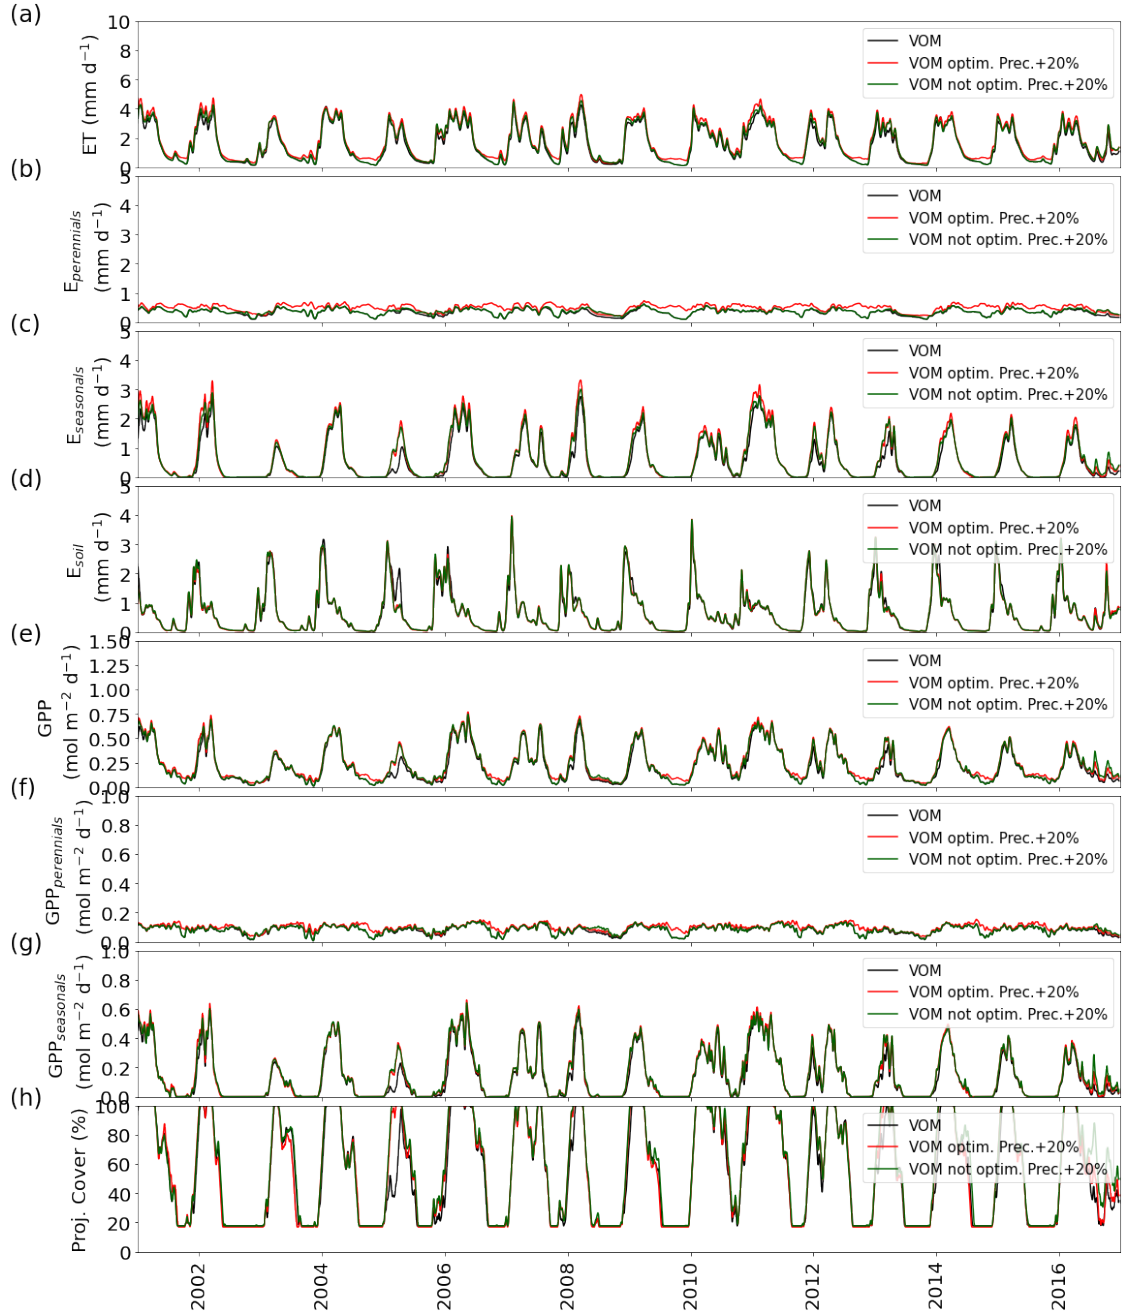

**Figure S1.42.** Fluxes for point 17.5S,131.5E from 2001-2016 (subset from 1980-2016) for a) ET, b) transpiration perennials (trees), c) transpiration seasonals (grasses), d) soil evaporation, e) GPP, f) GPP perennials (trees), g) GPP seasonals (grasses), all smoothed with a moving average of 7 days, for the optimized VOM (black), optimized VOM with increased precipitation (red), and the VOM without optimization and increased precipitation (green).

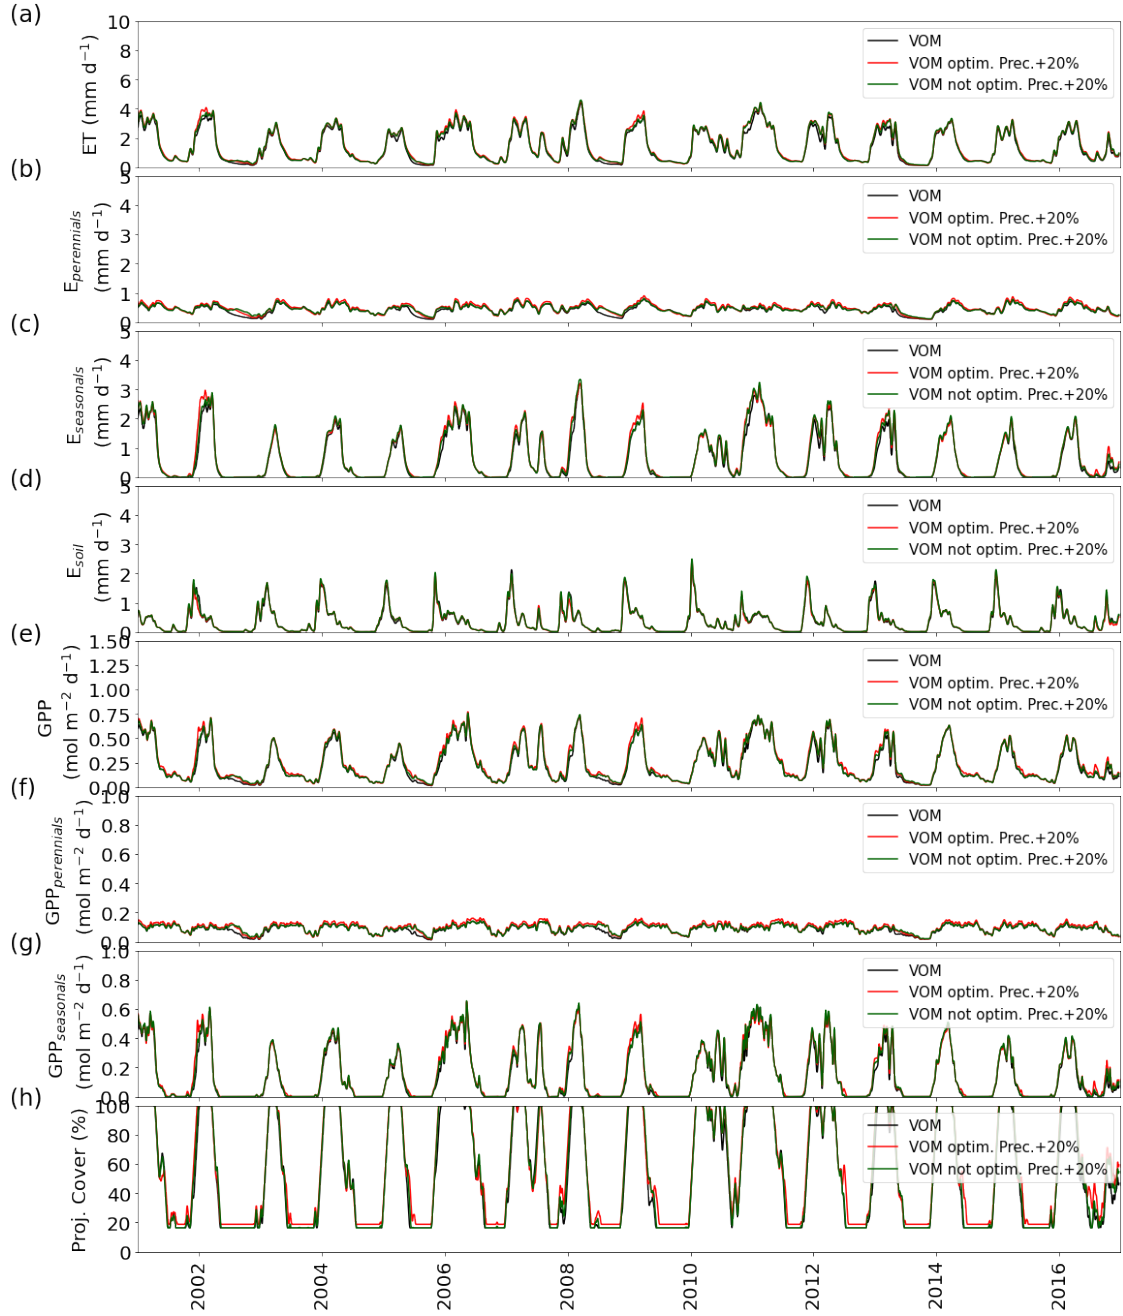

**Figure S1.43.** Fluxes for point 17.5S,132.0E from 2001-2016 (subset from 1980-2016) for a) ET, b) transpiration perennials (trees), c) transpiration seasonals (grasses), d) soil evaporation, e) GPP, f) GPP perennials (trees), g) GPP seasonals (grasses), all smoothed with a moving average of 7 days, for the optimized VOM (black), optimized VOM with increased precipitation (red), and the VOM without optimization and increased precipitation (green).

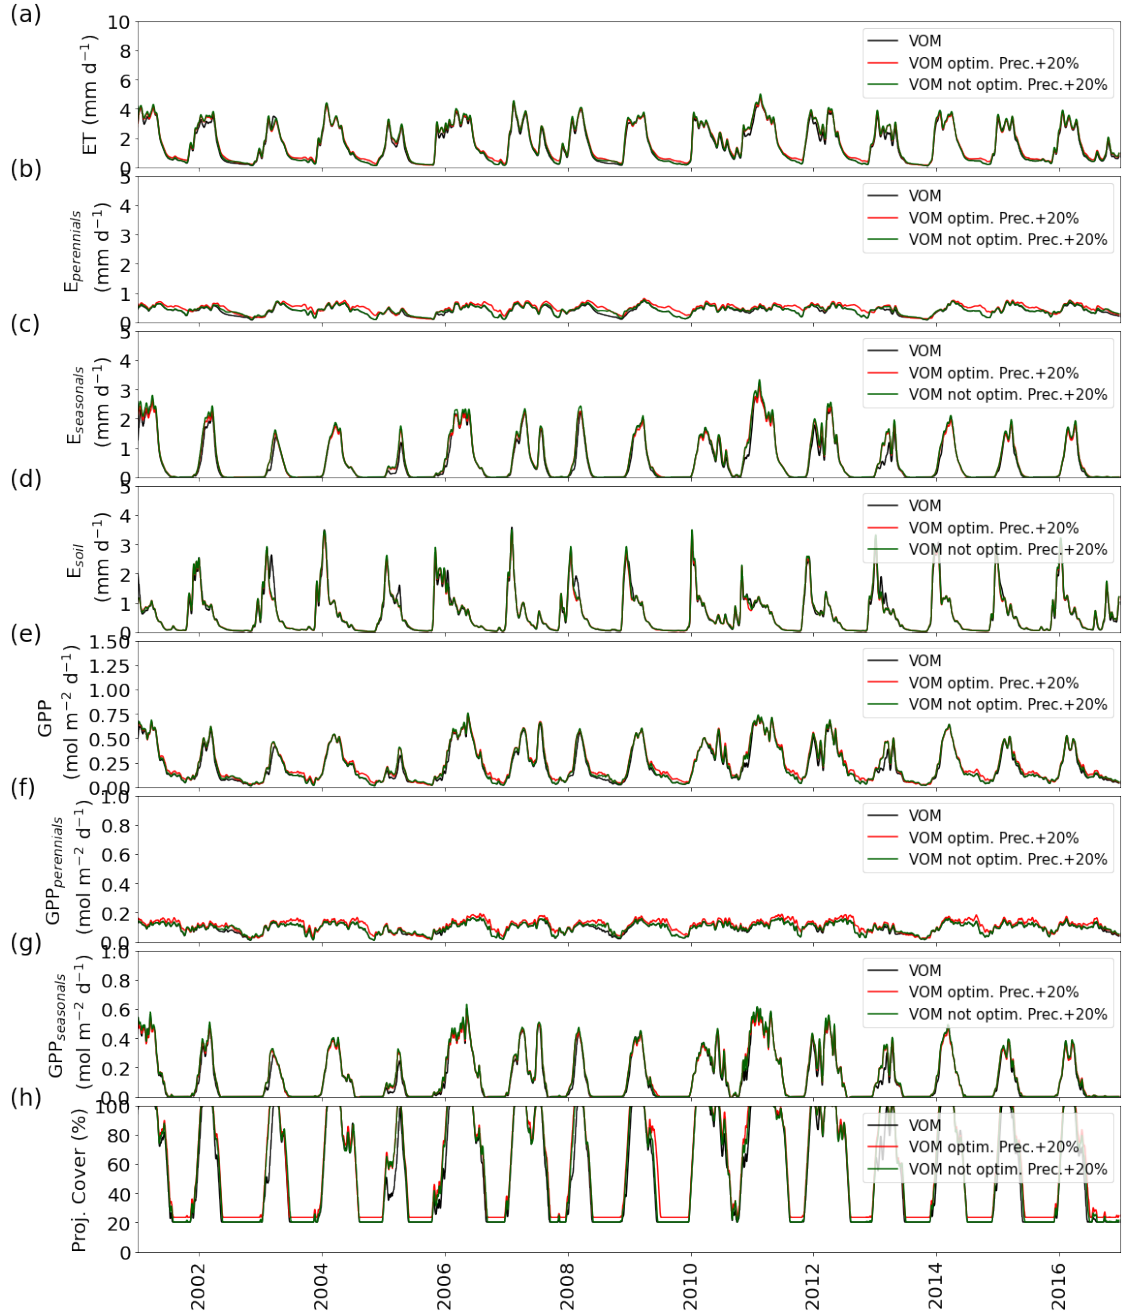

**Figure S1.44.** Fluxes for point 17.5S,132.5E from 2001-2016 (subset from 1980-2016) for a) ET, b) transpiration perennials (trees), c) transpiration seasonals (grasses), d) soil evaporation, e) GPP, f) GPP perennials (trees), g) GPP seasonals (grasses), all smoothed with a moving average of 7 days, for the optimized VOM (black), optimized VOM with increased precipitation (red), and the VOM without optimization and increased precipitation (green).

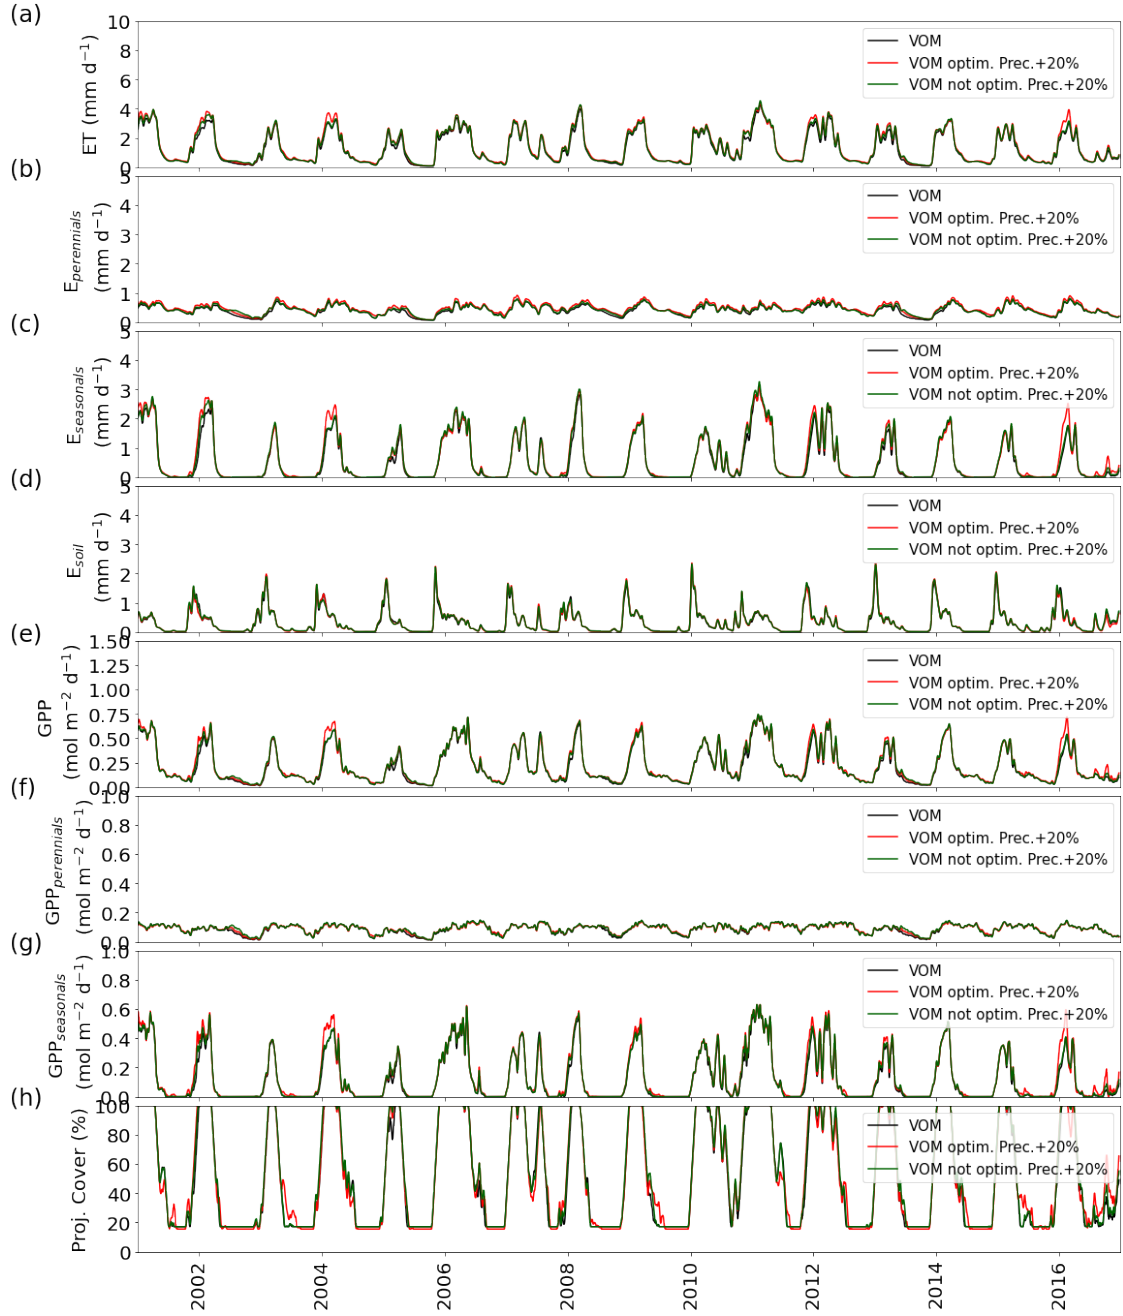

**Figure S1.45.** Fluxes for point 17.5S,133.0E from 2001-2016 (subset from 1980-2016) for a) ET, b) transpiration perennials (trees), c) transpiration seasonals (grasses), d) soil evaporation, e) GPP, f) GPP perennials (trees), g) GPP seasonals (grasses), all smoothed with a moving average of 7 days, for the optimized VOM (black), optimized VOM with increased precipitation (red), and the VOM without optimization and increased precipitation (green).

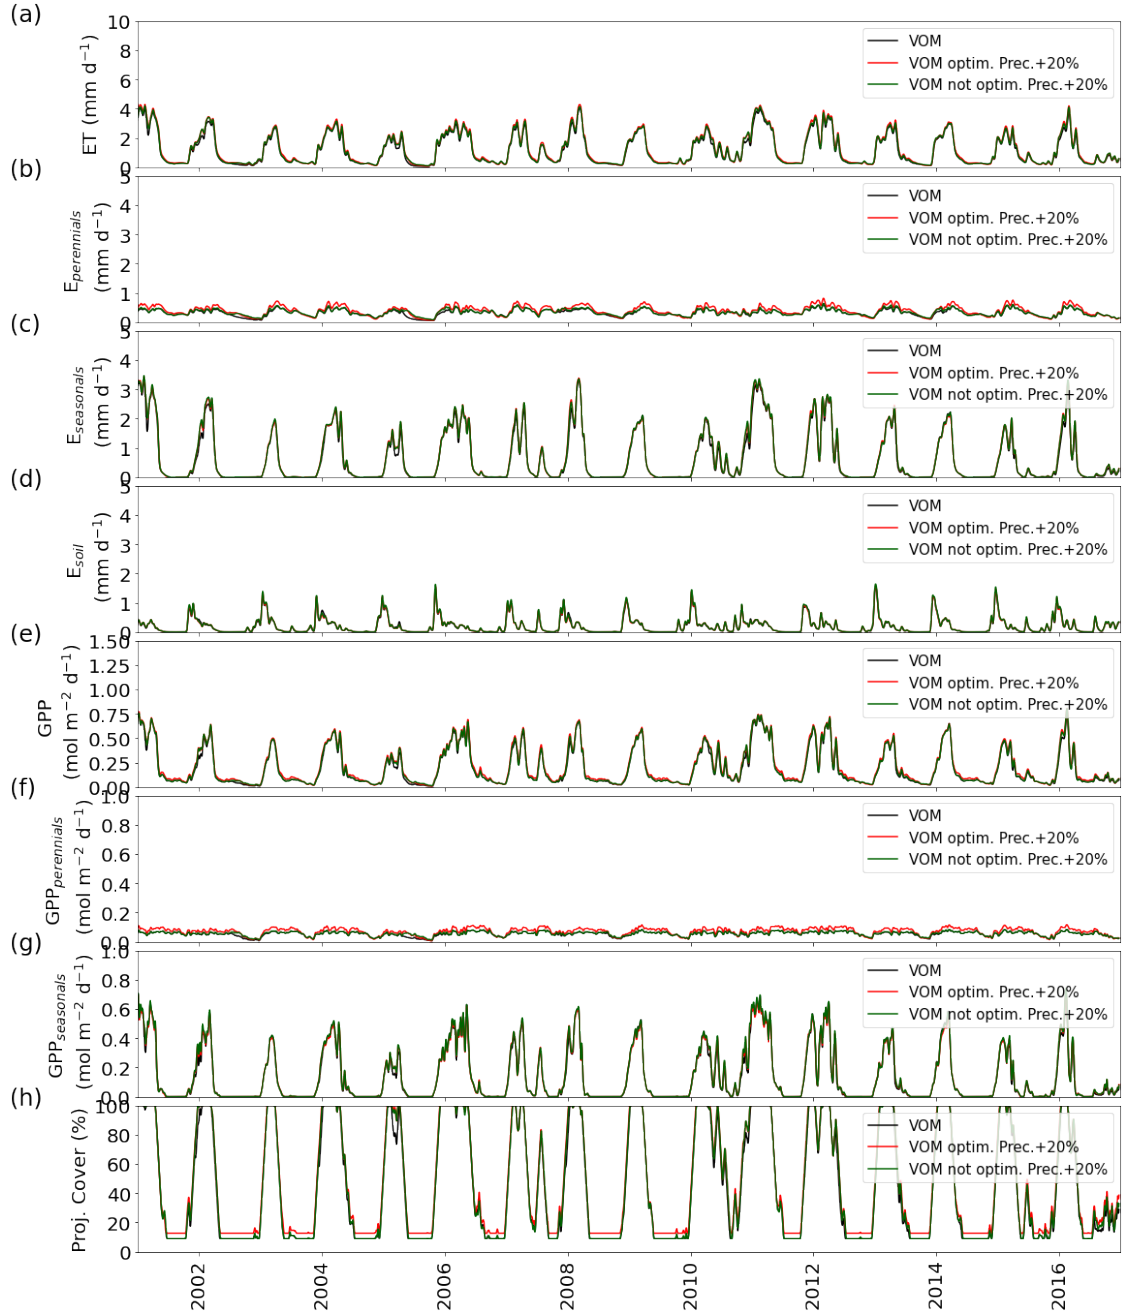

**Figure S1.46.** Fluxes for point 17.5S,133.5E from 2001-2016 (subset from 1980-2016) for a) ET, b) transpiration perennials (trees), c) transpiration seasonals (grasses), d) soil evaporation, e) GPP, f) GPP perennials (trees), g) GPP seasonals (grasses), all smoothed with a moving average of 7 days, for the optimized VOM (black), optimized VOM with increased precipitation (red), and the VOM without optimization and increased precipitation (green).

### 1.3 Australian catchments

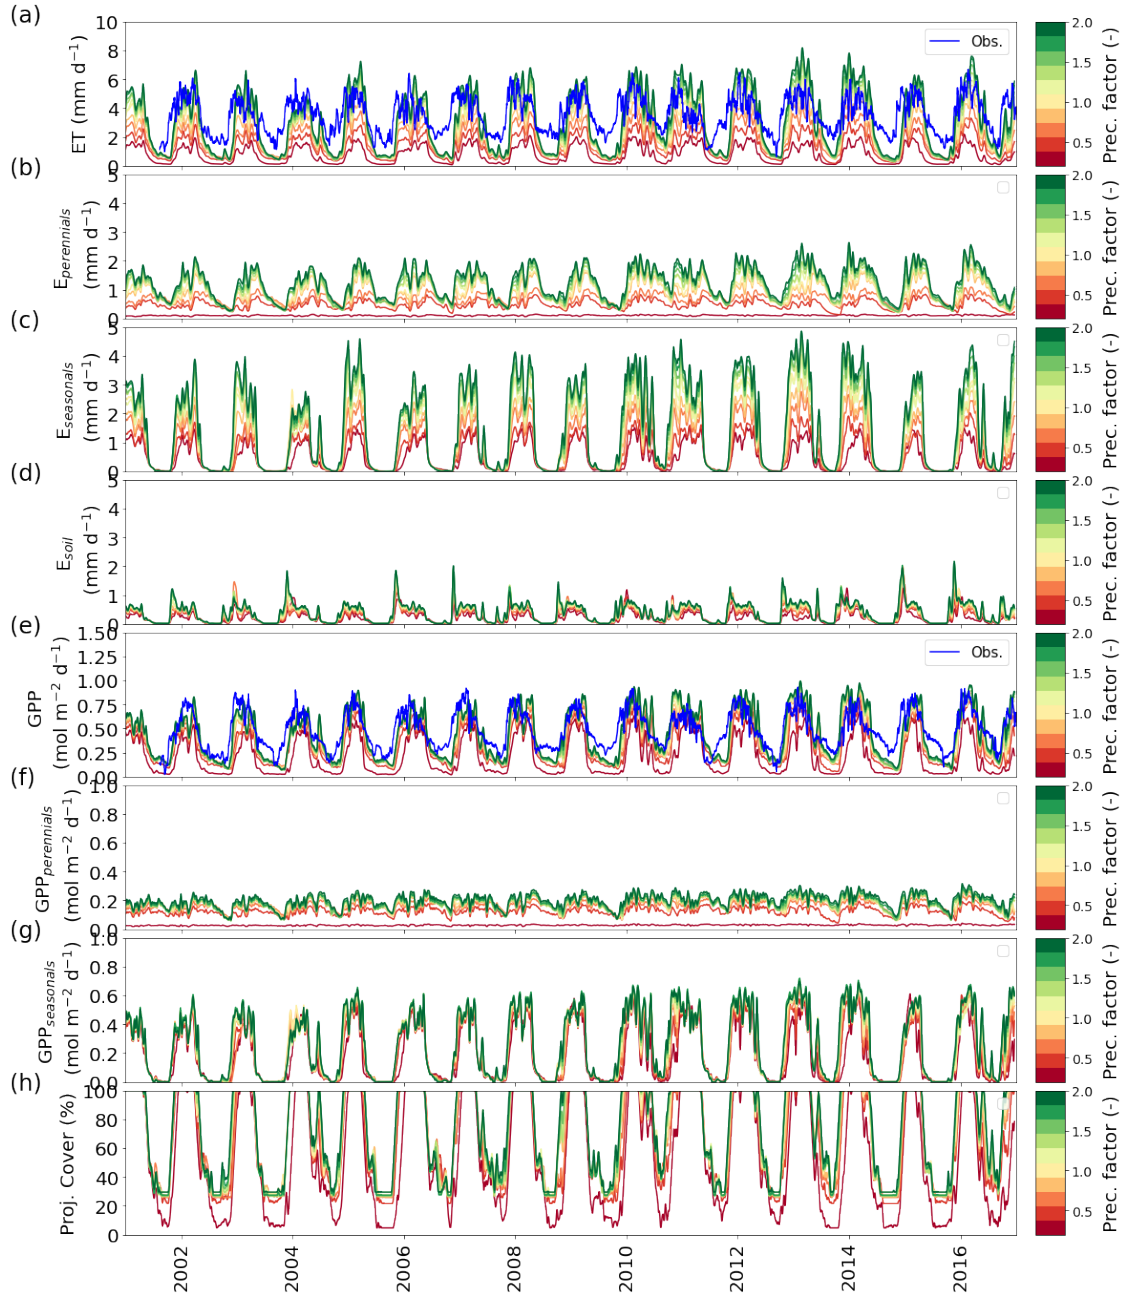

**Figure S1.47.** Fluxes for the Adelaide River catchment from 2001-2016 (subset from 1980-2016) for a) ET, b) transpiration perennials (trees), c) transpiration seasonals (grasses), d) soil evaporation, e) GPP, f) GPP perennials (trees), g) GPP seasonals (grasses), all smoothed with a moving average of 7 days, for the optimized VOM with different multiplications of the precipitation (color scale).

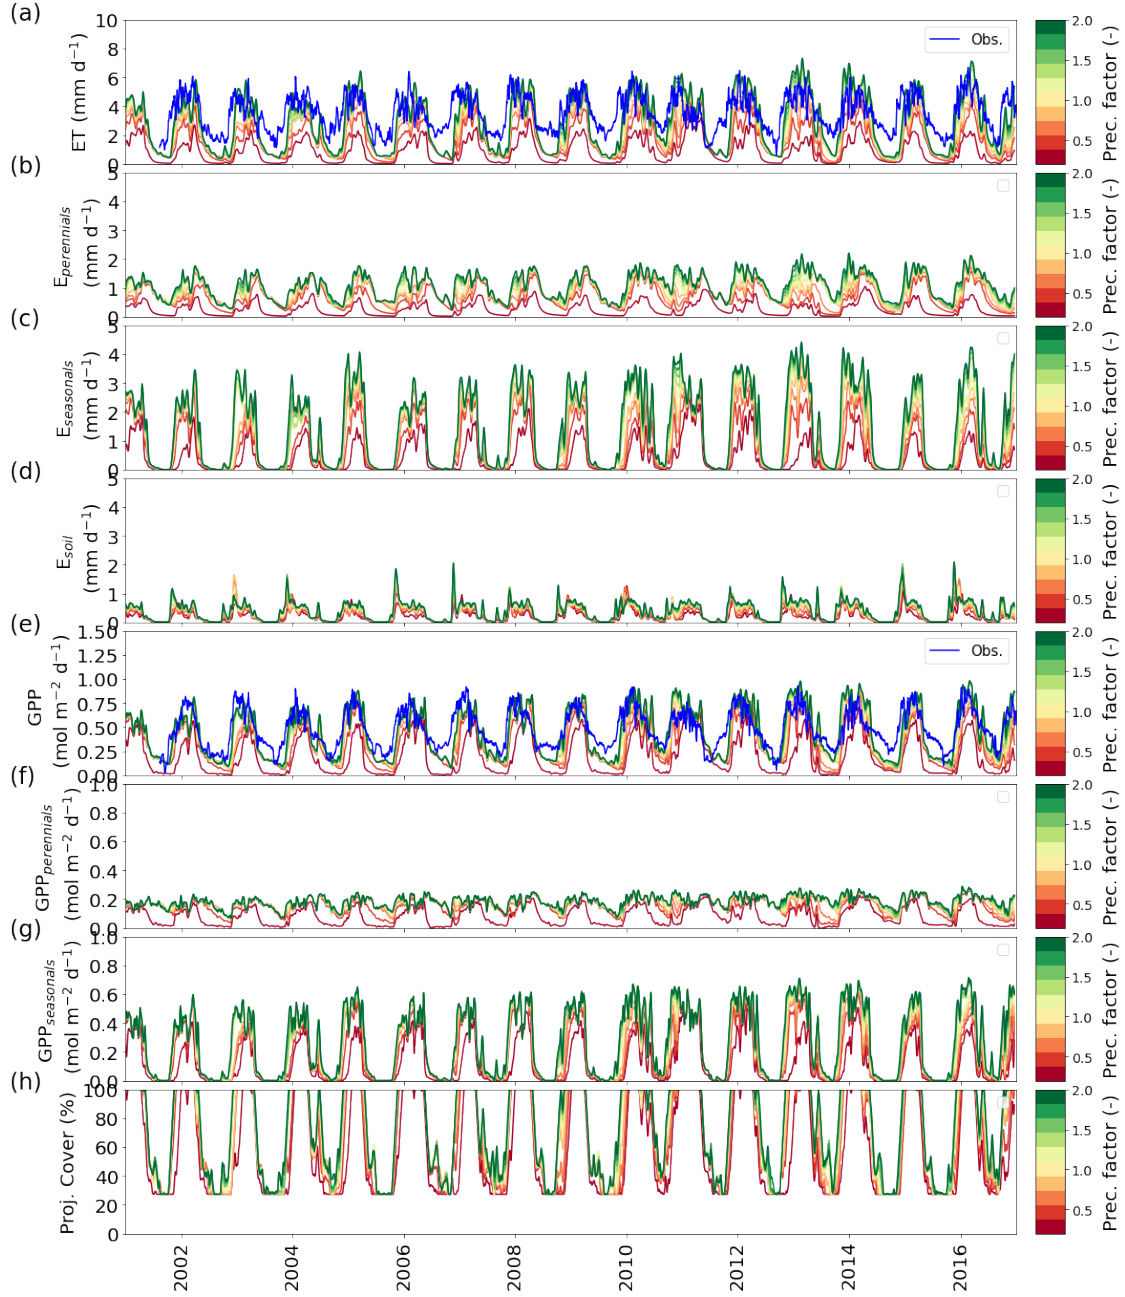

**Figure S1.48.** Fluxes for the Adelaide River catchment from 2001-2016 (subset from 1980-2016) for a) ET, b) transpiration perennials (trees), c) transpiration seasonals (grasses), d) soil evaporation, e) GPP, f) GPP perennials (trees), g) GPP seasonals (grasses), all smoothed with a moving average of 7 days, for the VOM with different multiplications of the precipitation (color scale) and the same vegetation parameters.

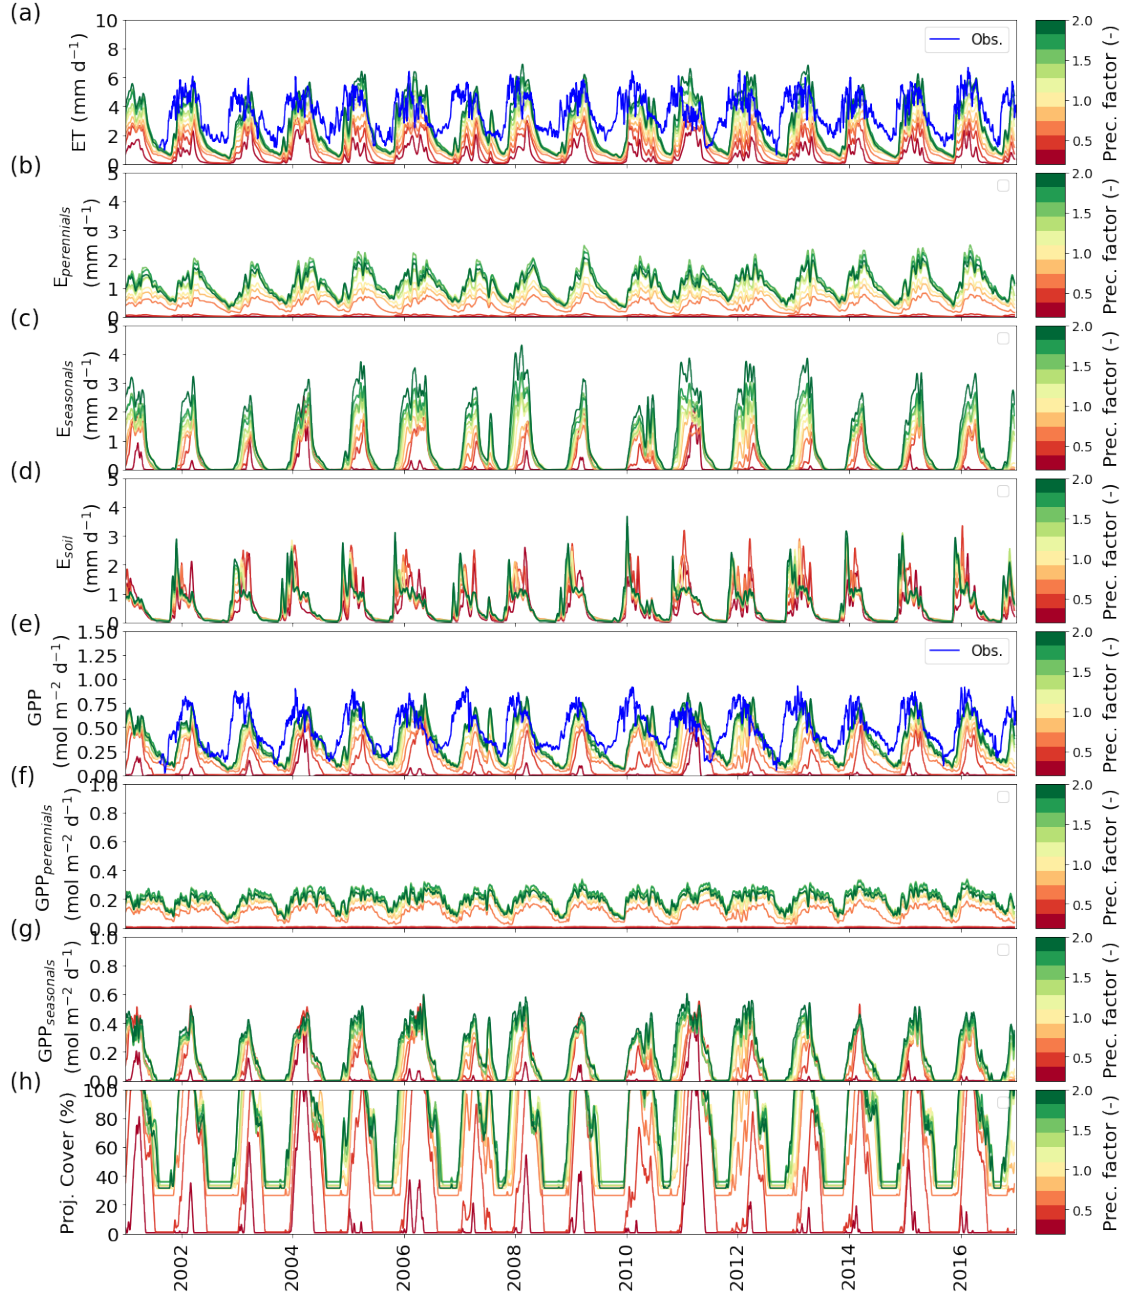

**Figure S1.49.** Fluxes for the Dry River catchment from 2001-2016 (subset from 1980-2016) for a) ET, b) transpiration perennials (trees), c) transpiration seasonals (grasses), d) soil evaporation, e) GPP, f) GPP perennials (trees), g) GPP seasonals (grasses), all smoothed with a moving average of 7 days, for the optimized VOM with different multiplications of the precipitation (color scale).

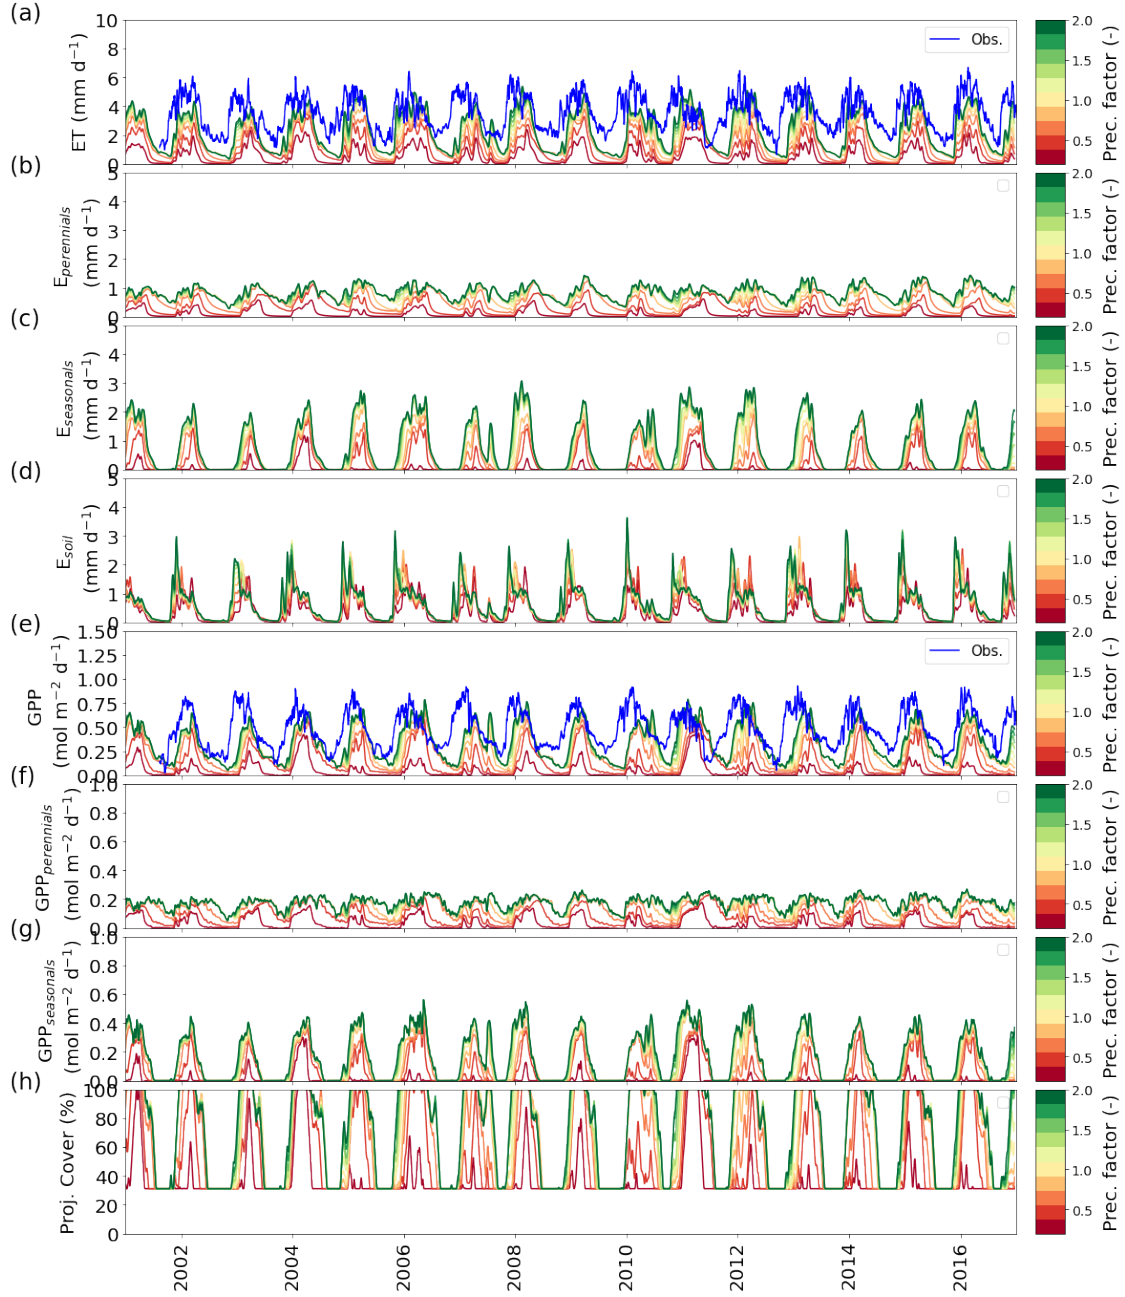

**Figure S1.50.** Fluxes for the Dry River catchment from 2001-2016 (subset from 1980-2016) for a) ET, b) transpiration perennials (trees), c) transpiration seasonals (grasses), d) soil evaporation, e) GPP, f) GPP perennials (trees), g) GPP seasonals (grasses), all smoothed with a moving average of 7 days, for the VOM with different multiplications of the precipitation (color scale) and the same vegetation parameters.

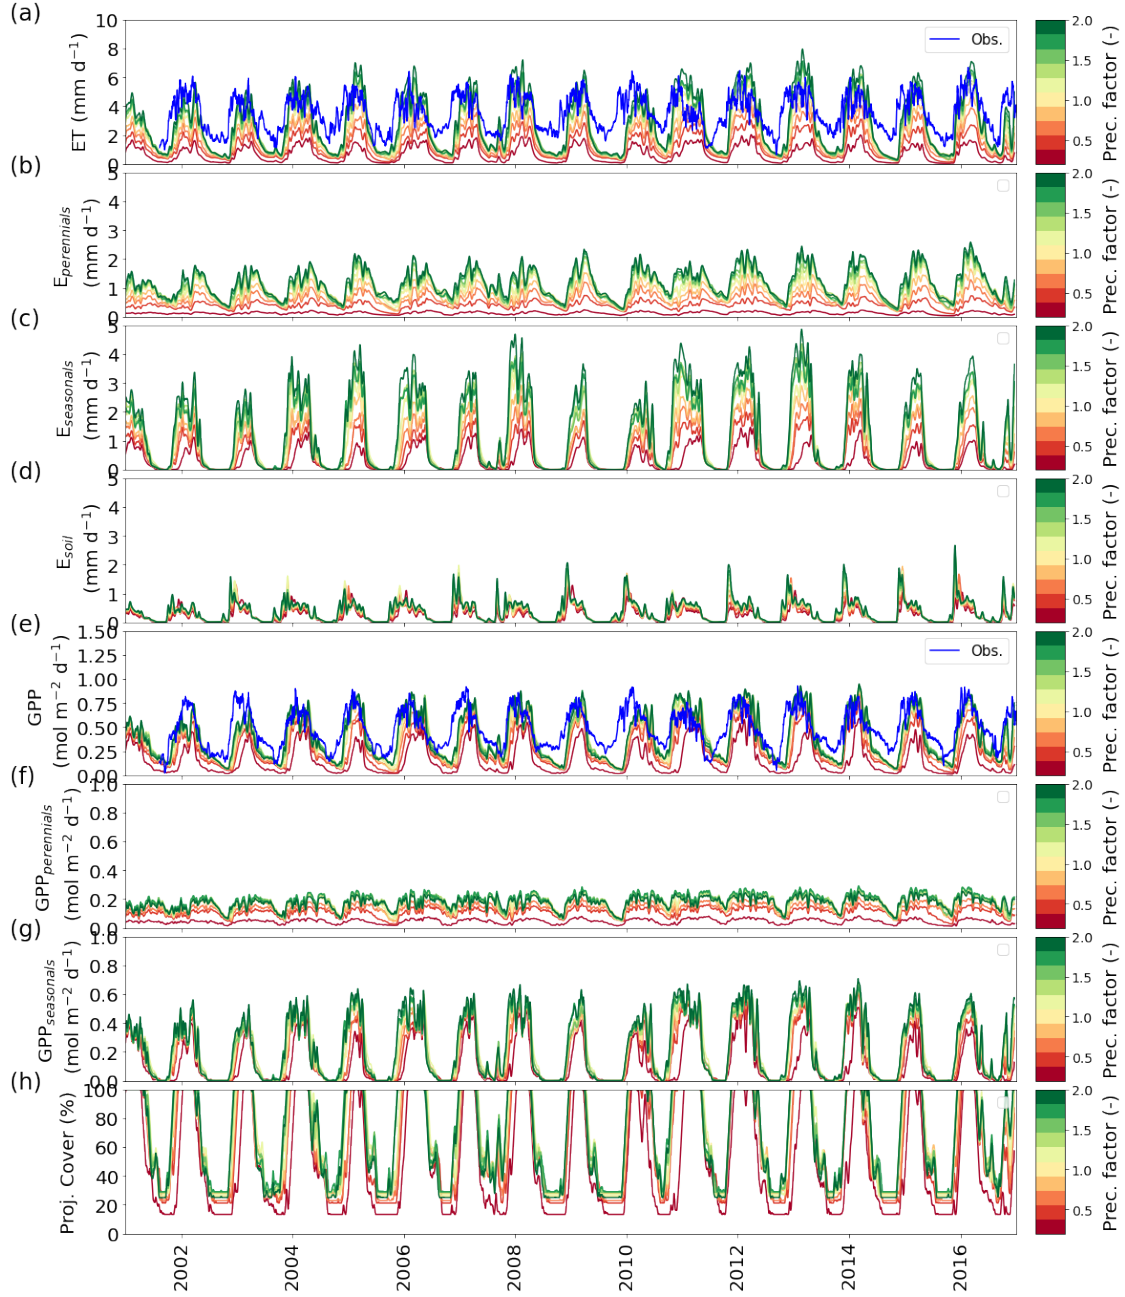

**Figure S1.51.** Fluxes for the Fergusson River catchment from 2001-2016 (subset from 1980-2016) for a) ET, b) transpiration perennials (trees), c) transpiration seasonals (grasses), d) soil evaporation, e) GPP, f) GPP perennials (trees), g) GPP seasonals (grasses), all smoothed with a moving average of 7 days, for the optimized VOM with different multiplications of the precipitation (color scale).

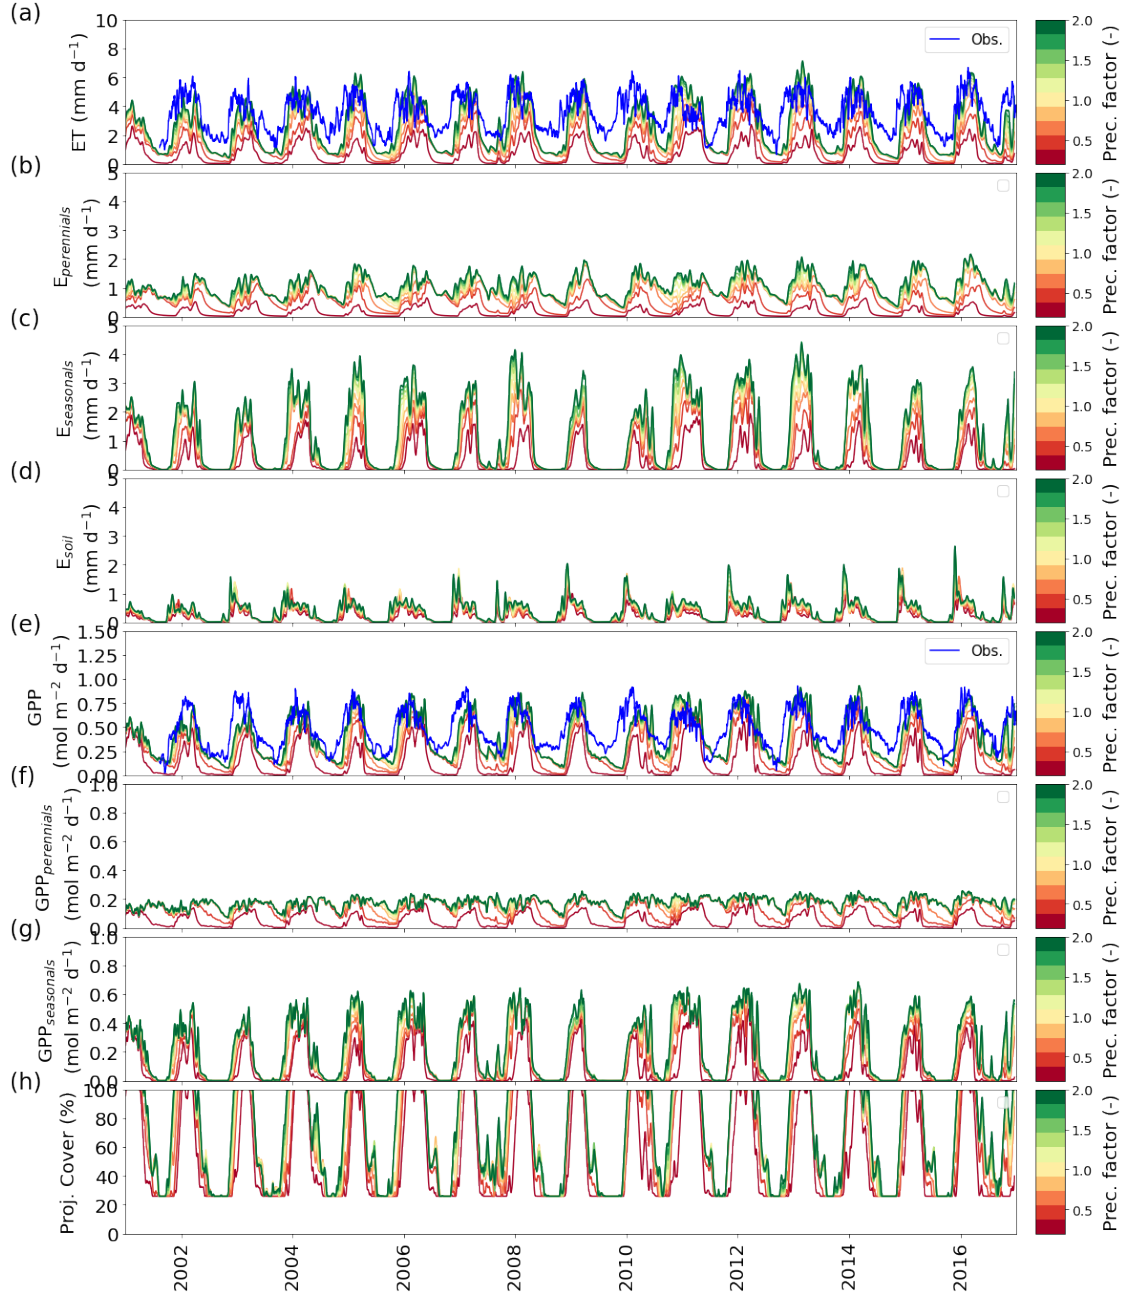

**Figure S1.52.** Fluxes for the Fergusson River catchment from 2001-2016 (subset from 1980-2016) for a) ET, b) transpiration perennials (trees), c) transpiration seasonals (grasses), d) soil evaporation, e) GPP, f) GPP perennials (trees), g) GPP seasonals (grasses), all smoothed with a moving average of 7 days, for the VOM with different multiplications of the precipitation (color scale) and the same vegetation parameters.

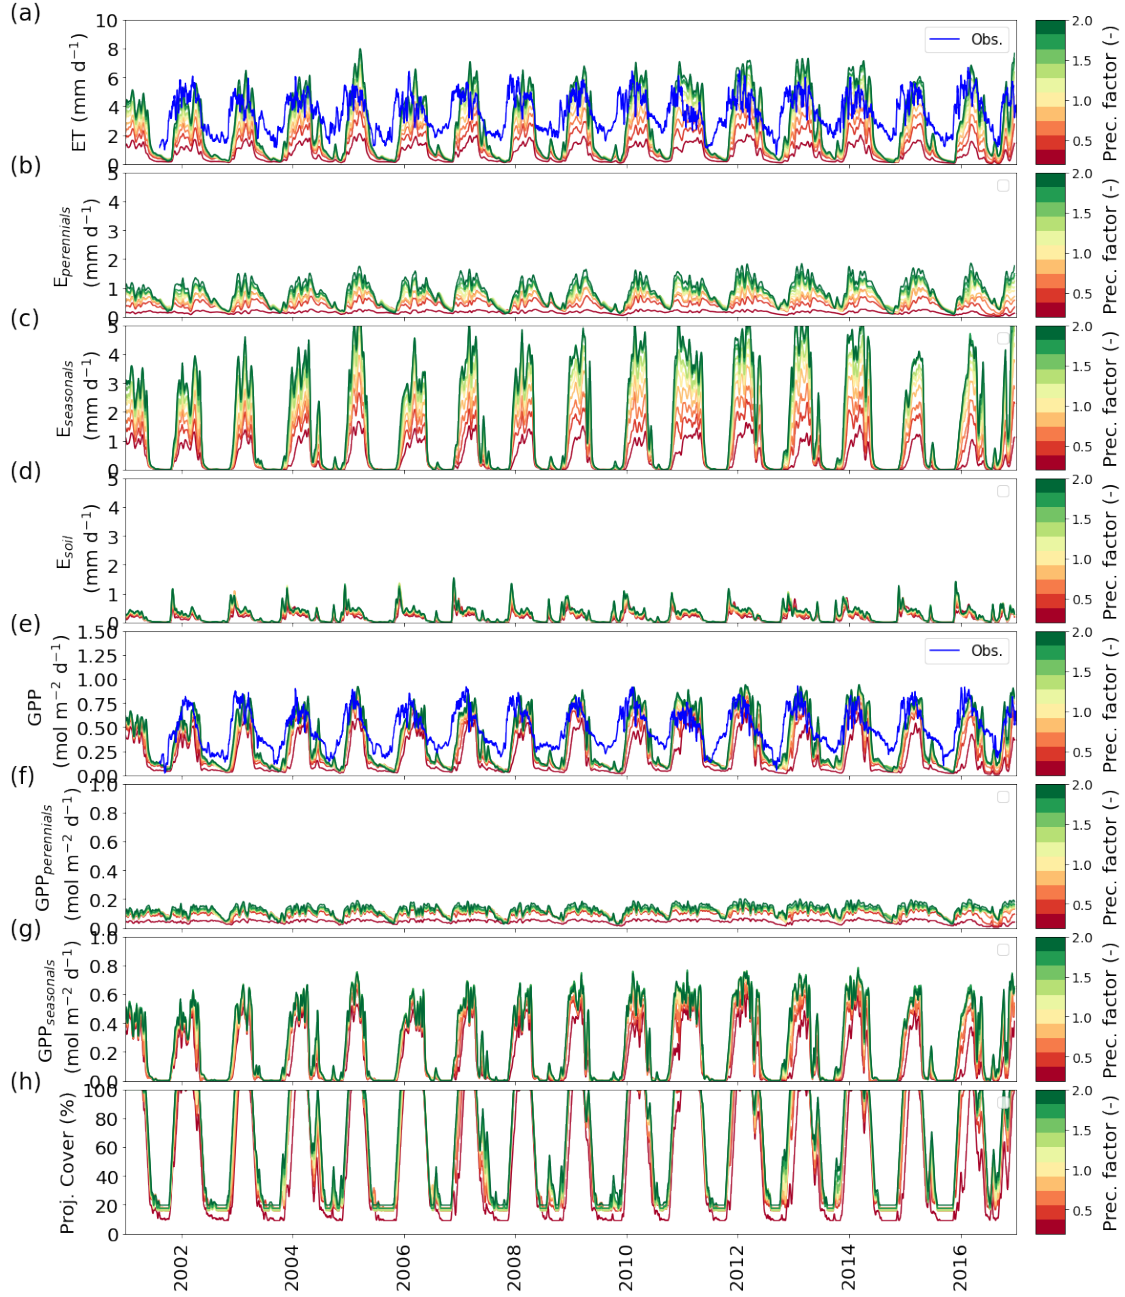

**Figure S1.53.** Fluxes for the Magela Creek catchment from 2001-2016 (subset from 1980-2016) for a) ET, b) transpiration perennials (trees), c) transpiration seasonals (grasses), d) soil evaporation, e) GPP, f) GPP perennials (trees), g) GPP seasonals (grasses), all smoothed with a moving average of 7 days, for the optimized VOM with different multiplications of the precipitation (color scale).

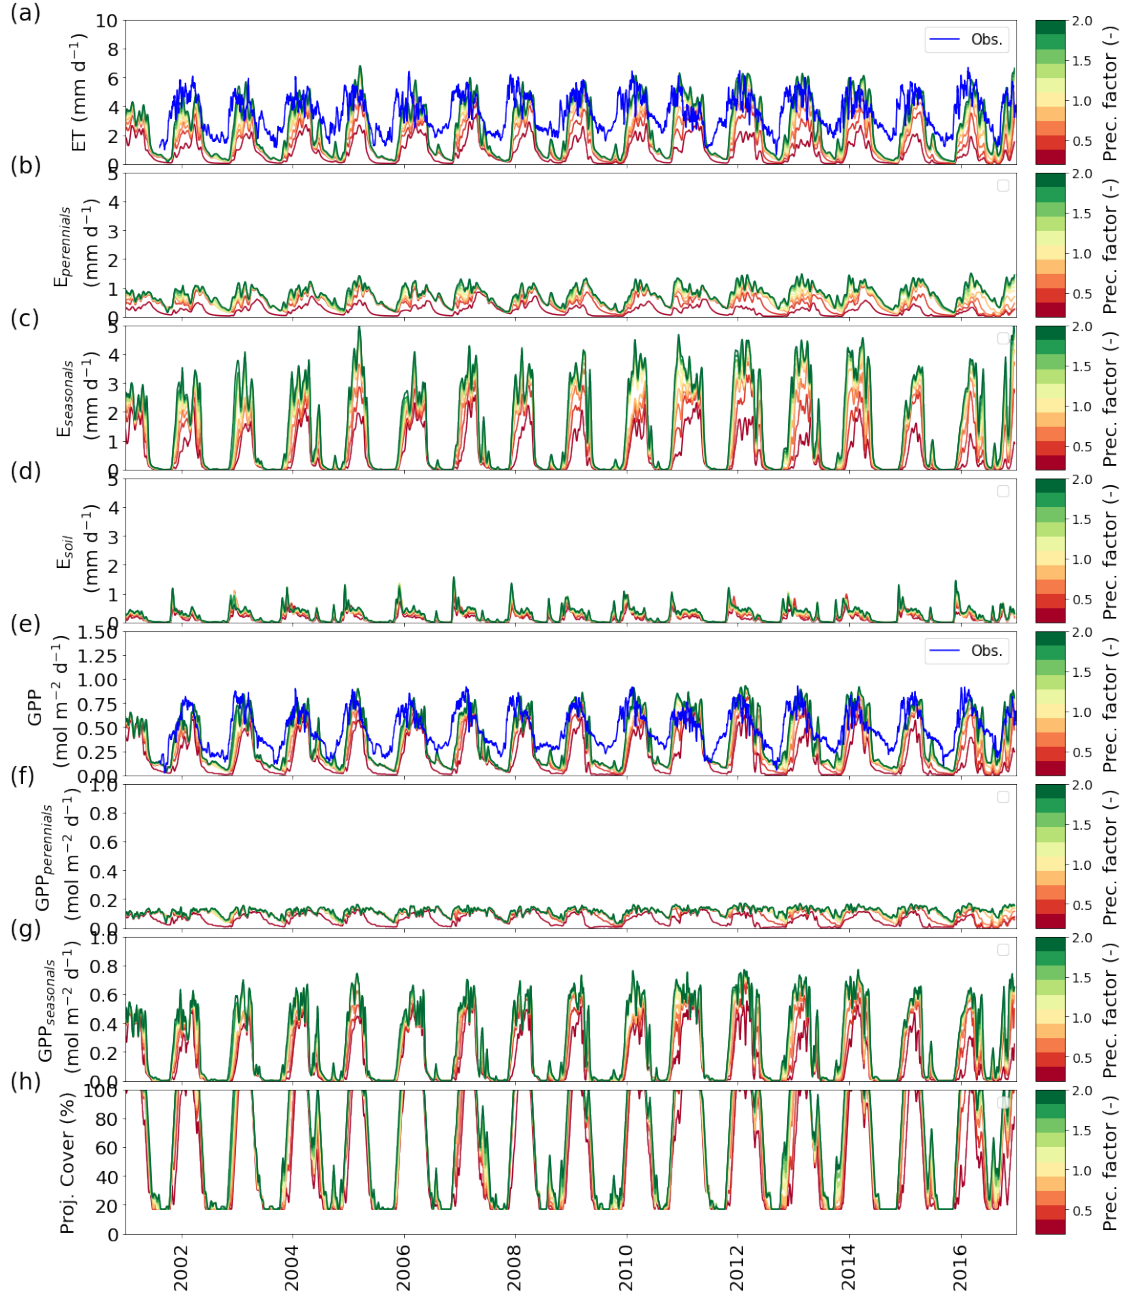

**Figure S1.54.** Fluxes for the Magela Creek catchment from 2001-2016 (subset from 1980-2016) for a) ET, b) transpiration perennials (trees), c) transpiration seasonals (grasses), d) soil evaporation, e) GPP, f) GPP perennials (trees), g) GPP seasonals (grasses), all smoothed with a moving average of 7 days, for the VOM with different multiplications of the precipitation (color scale) and the same vegetation parameters.
